# Supplementary material for: Comparative Efficacy of Different Protein Supplements on Muscle Mass, Strength, and Physical Indices of Sarcopenia among Community-Dwelling, Hospitalized or Institutionalized Older Adults Undergoing Resistance Training: A Network Meta-Analysis of Randomized Controlled Trials
Source: MDPI journal article supplement (doi:10.3390/nu16070941), 2024-03-25

Figure S1. Risk of bias summary for each trial

|                          | Random sequence generation (selection bias) | Allocation concealment (selection bias) | Blinding of participants and personnel (performance bias) | Blinding of outcome assessment (detection bias) | Incomplete outcome data (attrition bias) | Selective reporting (reporting bias) | Other bias | Overall |
|--------------------------|---------------------------------------------|-----------------------------------------|-----------------------------------------------------------|-------------------------------------------------|------------------------------------------|--------------------------------------|------------|---------|
| Aas 2019                 | +                                           | +                                       | -                                                         | -                                               | -                                        | +                                    | +          | -       |
| Amasene 2019             | ?                                           | -                                       | +                                                         | -                                               | -                                        | +                                    | +          | -       |
| Andiero 2014             | ?                                           | -                                       | -                                                         | -                                               | -                                        | +                                    | +          | -       |
| Amarnson 2013            | +                                           | +                                       | +                                                         | +                                               | -                                        | +                                    | +          | ?       |
| Bagheri 2022             | +                                           | +                                       | +                                                         | +                                               | -                                        | +                                    | +          | ?       |
| Bijeh 2022               | +                                           | +                                       | +                                                         | +                                               | +                                        | +                                    | +          | +       |
| Candow 2006              | +                                           | +                                       | +                                                         | +                                               | -                                        | +                                    | -          | -       |
| Candow 2008              | ?                                           | -                                       | +                                                         | +                                               | -                                        | +                                    | -          | -       |
| Chale 2013               | +                                           | +                                       | -                                                         | -                                               | +                                        | +                                    | +          | -       |
| Chang 2019               | ?                                           | -                                       | -                                                         | -                                               | ?                                        | +                                    | ?          | -       |
| Chen 2017                | +                                           | -                                       | -                                                         | +                                               | +                                        | +                                    | ?          | -       |
| Colonetti 2023           | +                                           | +                                       | +                                                         | +                                               | -                                        | +                                    | +          | ?       |
| Daly 2014                | +                                           | +                                       | -                                                         | ?                                               | +                                        | +                                    | +          | ?       |
| de Azevedo Bach 2022     | +                                           | +                                       | +                                                         | +                                               | -                                        | +                                    | +          | ?       |
| de Carvalho Bastona 2020 | +                                           | +                                       | -                                                         | +                                               | +                                        | +                                    | +          | ?       |
| Deer 2019                | +                                           | +                                       | +                                                         | -                                               | +                                        | +                                    | +          | ?       |
| Deibert 2011             | ?                                           | -                                       | -                                                         | -                                               | -                                        | +                                    | +          | -       |
| Duff 2014                | +                                           | -                                       | +                                                         | +                                               | +                                        | +                                    | -          | -       |
| Dulac 2021               | ?                                           | -                                       | +                                                         | +                                               | -                                        | +                                    | +          | -       |
| Eliot 2008               | ?                                           | -                                       | +                                                         | +                                               | +                                        | +                                    | +          | ?       |
| Fialarone 1994           | ?                                           | -                                       | +                                                         | -                                               | -                                        | +                                    | +          | -       |
| Formica 2020             | +                                           | +                                       | -                                                         | -                                               | +                                        | +                                    | +          | -       |
| Francis 2017             | ?                                           | -                                       | -                                                         | -                                               | -                                        | +                                    | -          | -       |
| Gade 2019                | +                                           | +                                       | +                                                         | +                                               | +                                        | +                                    | +          | +       |
| Granic 2020              | +                                           | +                                       | -                                                         | -                                               | -                                        | +                                    | -          | -       |
| Griffen 2022             | +                                           | +                                       | +                                                         | +                                               | -                                        | +                                    | +          | ?       |
| Gronstedt 2020           | +                                           | -                                       | -                                                         | -                                               | +                                        | +                                    | +          | -       |
| Hamarsland 2019          | +                                           | ?                                       | +                                                         | +                                               | -                                        | +                                    | +          | ?       |
| Heß 2022                 | +                                           | ?                                       | -                                                         | -                                               | -                                        | +                                    | +          | -       |
| Haub 2002                | ?                                           | -                                       | -                                                         | -                                               | -                                        | +                                    | -          | -       |
| He 2022                  | +                                           | -                                       | -                                                         | -                                               | +                                        | +                                    | ?          | -       |
| Holm 2008                | ?                                           | -                                       | +                                                         | +                                               | -                                        | +                                    | -          | -       |
| Holwerda 2018            | ?                                           | -                                       | +                                                         | +                                               | -                                        | +                                    | ?          | -       |
| Kang 2020                | +                                           | +                                       | +                                                         | +                                               | -                                        | +                                    | +          | ?       |
| Kanelis 2015             | ?                                           | -                                       | +                                                         | +                                               | -                                        | +                                    | +          | -       |
| Kemmler 2020             | +                                           | +                                       | +                                                         | +                                               | +                                        | +                                    | +          | +       |
| Krause 2019              | ?                                           | -                                       | +                                                         | -                                               | +                                        | +                                    | +          | -       |
| Kukuljan 2009            | ?                                           | -                                       | -                                                         | -                                               | +                                        | +                                    | +          | -       |
| Kwon 2015                | +                                           | +                                       | +                                                         | +                                               | -                                        | +                                    | +          | ?       |
| Lamb 2020                | ?                                           | -                                       | -                                                         | -                                               | -                                        | +                                    | +          | -       |
| Leenders 2013            | ?                                           | -                                       | +                                                         | +                                               | -                                        | +                                    | +          | -       |
| Liao 2021                | +                                           | +                                       | -                                                         | +                                               | +                                        | +                                    | +          | ?       |
| Maesta 2007              | ?                                           | -                                       | +                                                         | -                                               | -                                        | +                                    | -          | -       |
| Maltais 2016             | ?                                           | ?                                       | +                                                         | +                                               | -                                        | +                                    | +          | ?       |
| McKenna 2021             | +                                           | +                                       | -                                                         | +                                               | +                                        | +                                    | +          | ?       |
| Mertz 2021               | +                                           | +                                       | +                                                         | +                                               | +                                        | +                                    | +          | +       |
| Miller 2021              | +                                           | +                                       | -                                                         | +                                               | +                                        | +                                    | +          | ?       |
| Mitchell 2018            | +                                           | +                                       | +                                                         | +                                               | +                                        | +                                    | +          | +       |
| Molnar 2016              | ?                                           | -                                       | -                                                         | -                                               | +                                        | +                                    | +          | -       |
| Mori 2018                | +                                           | +                                       | -                                                         | -                                               | -                                        | +                                    | +          | -       |
| Mori 2022                | +                                           | +                                       | -                                                         | +                                               | -                                        | +                                    | +          | -       |
| Nabuco 2018              | +                                           | +                                       | +                                                         | +                                               | -                                        | +                                    | +          | ?       |
| Nabuco 2019b             | +                                           | +                                       | +                                                         | +                                               | +                                        | +                                    | +          | +       |
| Nabuco 2019c             | +                                           | +                                       | +                                                         | +                                               | +                                        | +                                    | +          | +       |
| Nielsen 2020             | +                                           | +                                       | +                                                         | +                                               | -                                        | +                                    | +          | ?       |
| Ossen 2015               | ?                                           | -                                       | -                                                         | +                                               | -                                        | +                                    | -          | -       |
| Orsatti 2018             | +                                           | +                                       | +                                                         | +                                               | -                                        | +                                    | +          | ?       |
| Roschel 2021             | +                                           | +                                       | +                                                         | +                                               | +                                        | +                                    | +          | +       |
| Seino 2018               | ?                                           | -                                       | -                                                         | +                                               | +                                        | +                                    | +          | -       |
| Shahar 2013              | ?                                           | -                                       | -                                                         | -                                               | -                                        | +                                    | +          | -       |
| Shenoy 2013              | ?                                           | -                                       | -                                                         | -                                               | +                                        | +                                    | ?          | -       |
| Soares 2023              | +                                           | +                                       | +                                                         | +                                               | +                                        | +                                    | +          | +       |
| Sugihara Junior 2018     | ?                                           | -                                       | +                                                         | +                                               | +                                        | +                                    | +          | ?       |
| Tang 2020                | +                                           | -                                       | -                                                         | -                                               | +                                        | +                                    | -          | -       |
| Thomson 2016             | +                                           | ?                                       | -                                                         | ?                                               | ?                                        | +                                    | +          | ?       |
| Tieland 2012             | +                                           | +                                       | +                                                         | +                                               | +                                        | +                                    | +          | +       |
| Trevisan 2010            | +                                           | +                                       | +                                                         | +                                               | +                                        | +                                    | +          | +       |
| Unterberger 2022         | +                                           | +                                       | +                                                         | +                                               | -                                        | +                                    | +          | ?       |
| Verdijk 2009             | ?                                           | -                                       | +                                                         | +                                               | -                                        | +                                    | +          | -       |
| Vereijken 2015           | +                                           | +                                       | +                                                         | +                                               | -                                        | +                                    | +          | ?       |
| Vijayakumaran 2023       | ?                                           | -                                       | -                                                         | -                                               | +                                        | +                                    | +          | -       |
| Vikberg 2019             | +                                           | +                                       | -                                                         | +                                               | -                                        | +                                    | +          | -       |
| Villanueva 2014          | ?                                           | -                                       | -                                                         | -                                               | +                                        | +                                    | ?          | -       |
| Weisgarber 2015          | ?                                           | -                                       | +                                                         | +                                               | -                                        | +                                    | +          | -       |
| Yamada 2019              | +                                           | -                                       | -                                                         | +                                               | +                                        | +                                    | +          | -       |
| Zdziebik 2021            | ?                                           | -                                       | +                                                         | +                                               | -                                        | +                                    | +          | -       |
| Zhao 2022                | +                                           | -                                       | -                                                         | -                                               | +                                        | +                                    | -          | -       |
| Zhu 2019                 | +                                           | +                                       | ?                                                         | +                                               | +                                        | +                                    | +          | +       |

Figure S2. Forest plot of node-splitting results for muscle mass

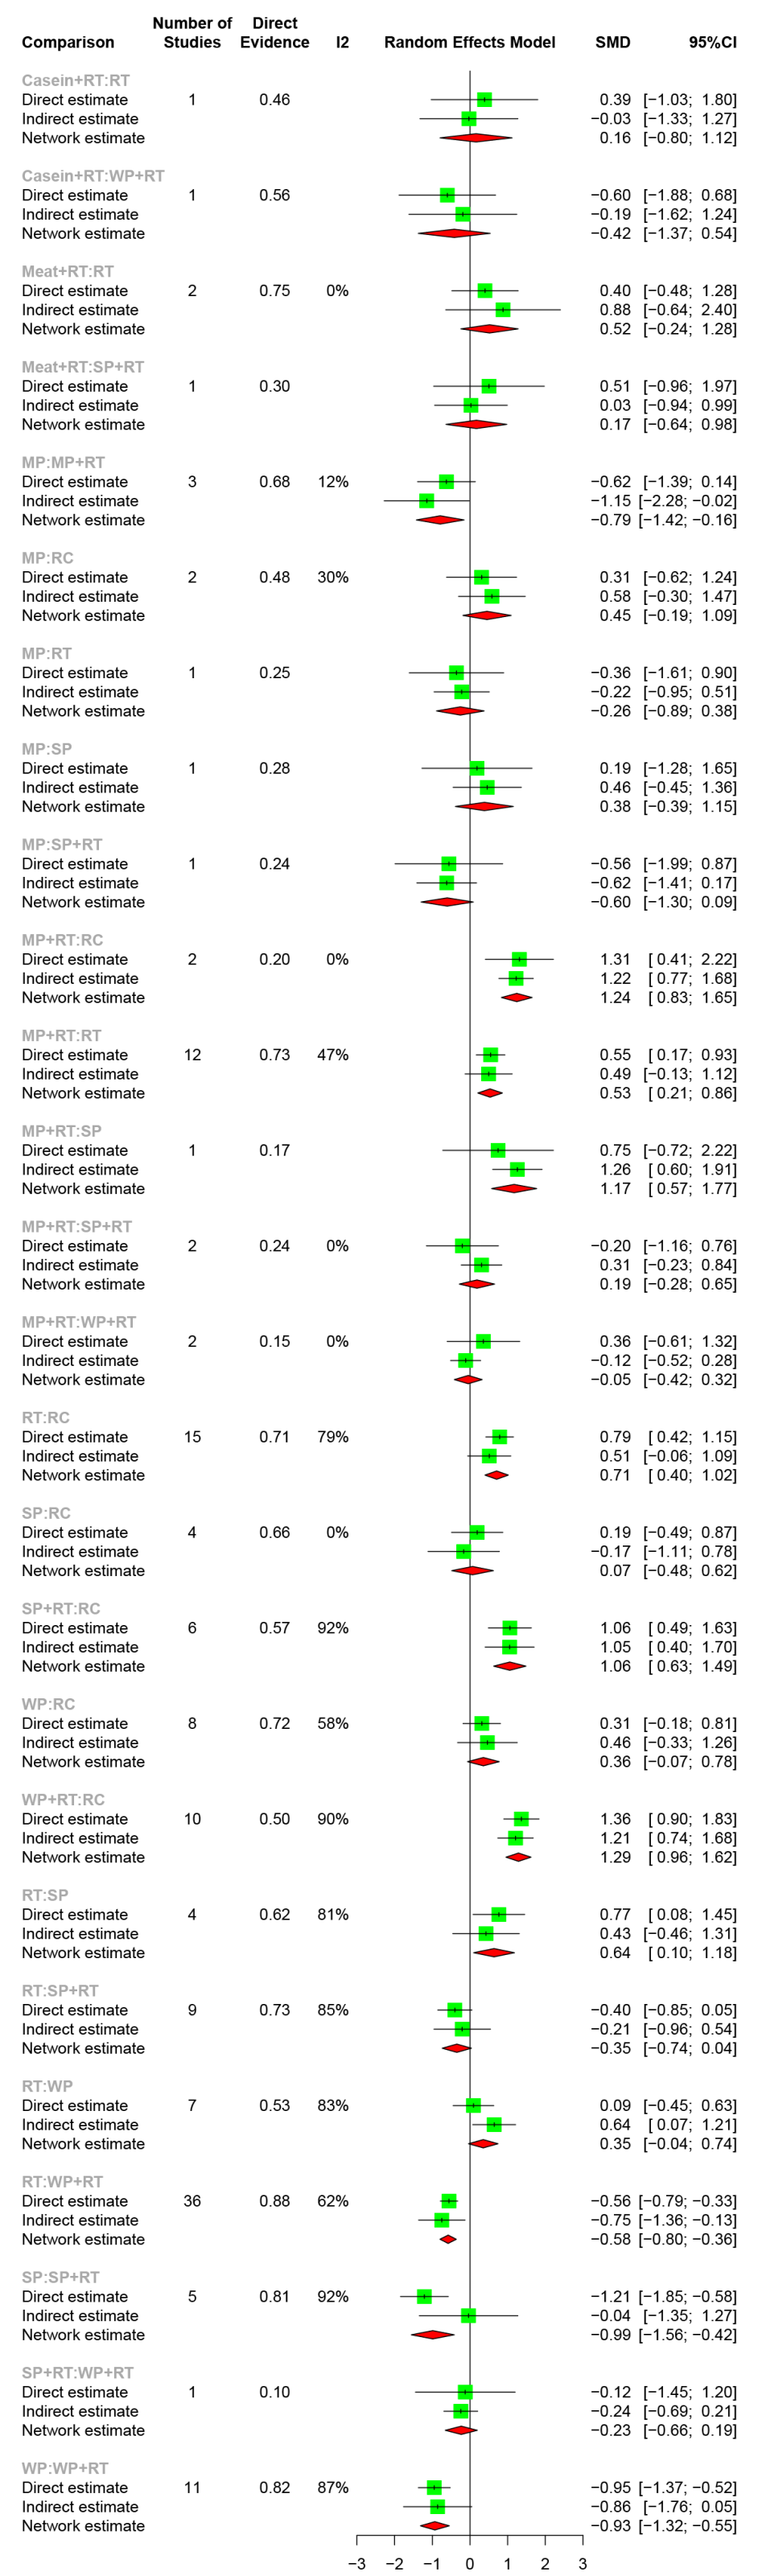

**Supplementary Figure S3.** Relative effects among treatment regimens for muscle mass gain at each follow-up time frame

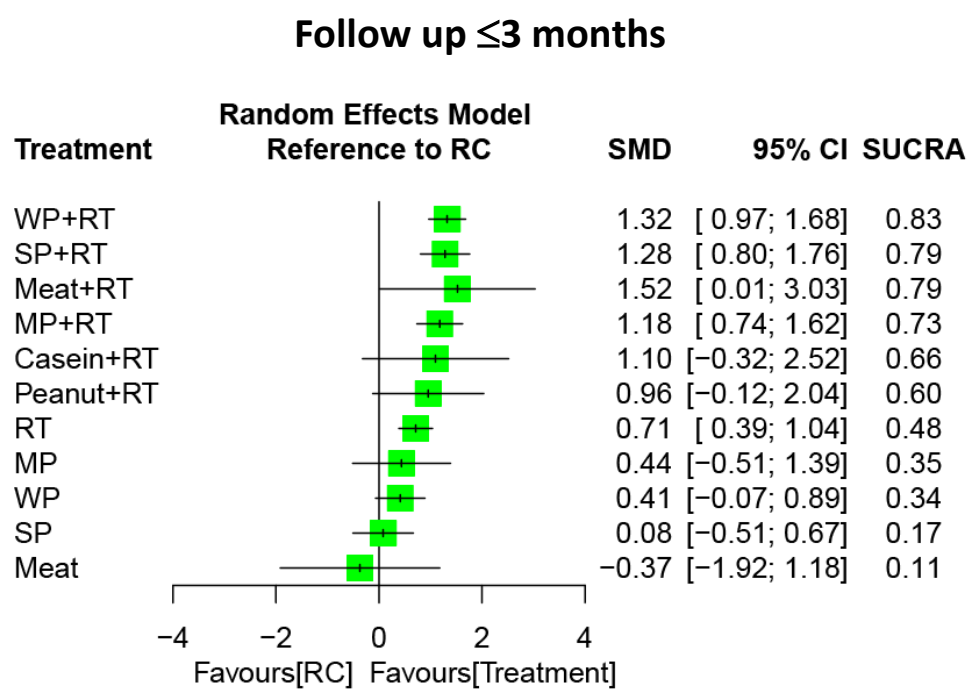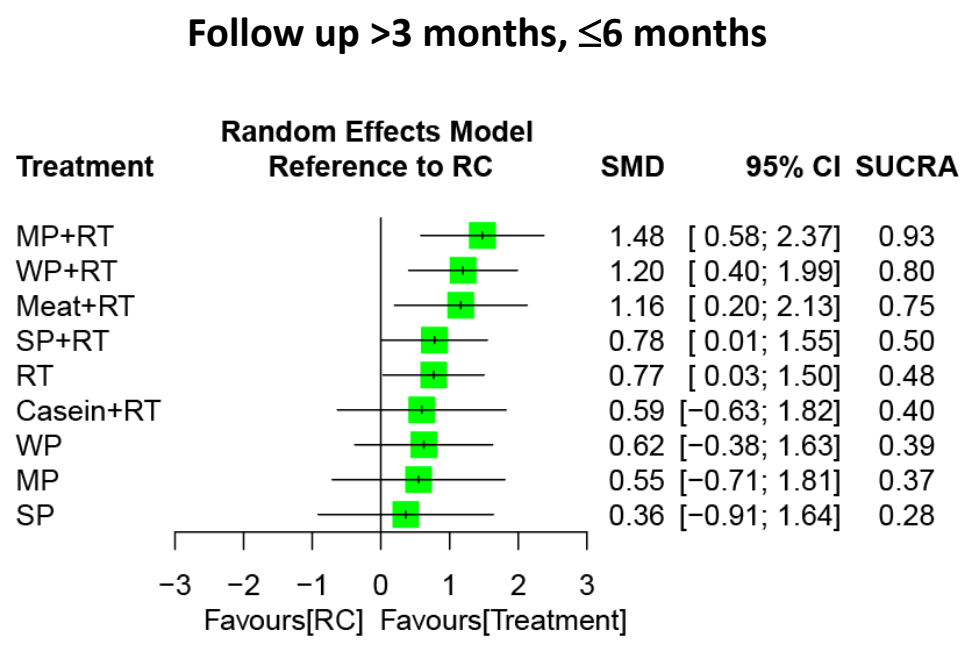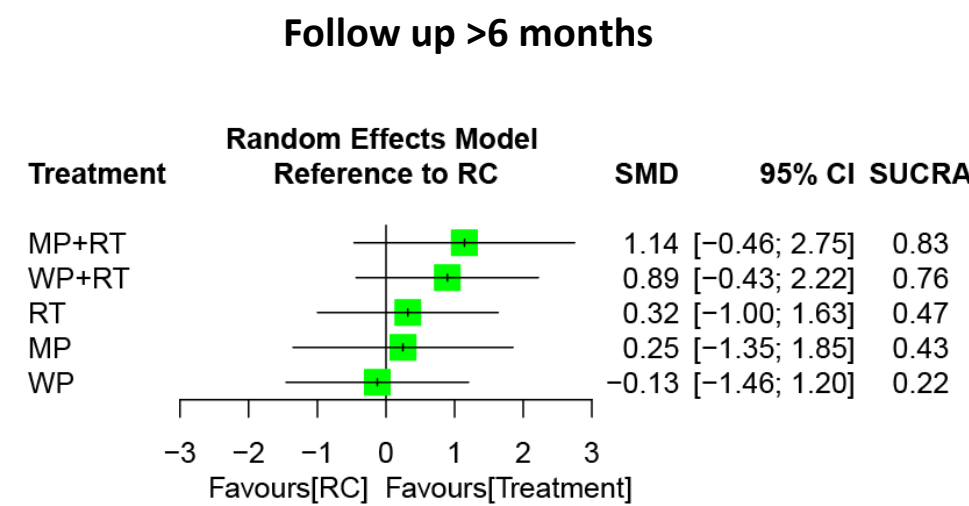

Figure S4. Forest plot of node-splitting results for handgrip strength

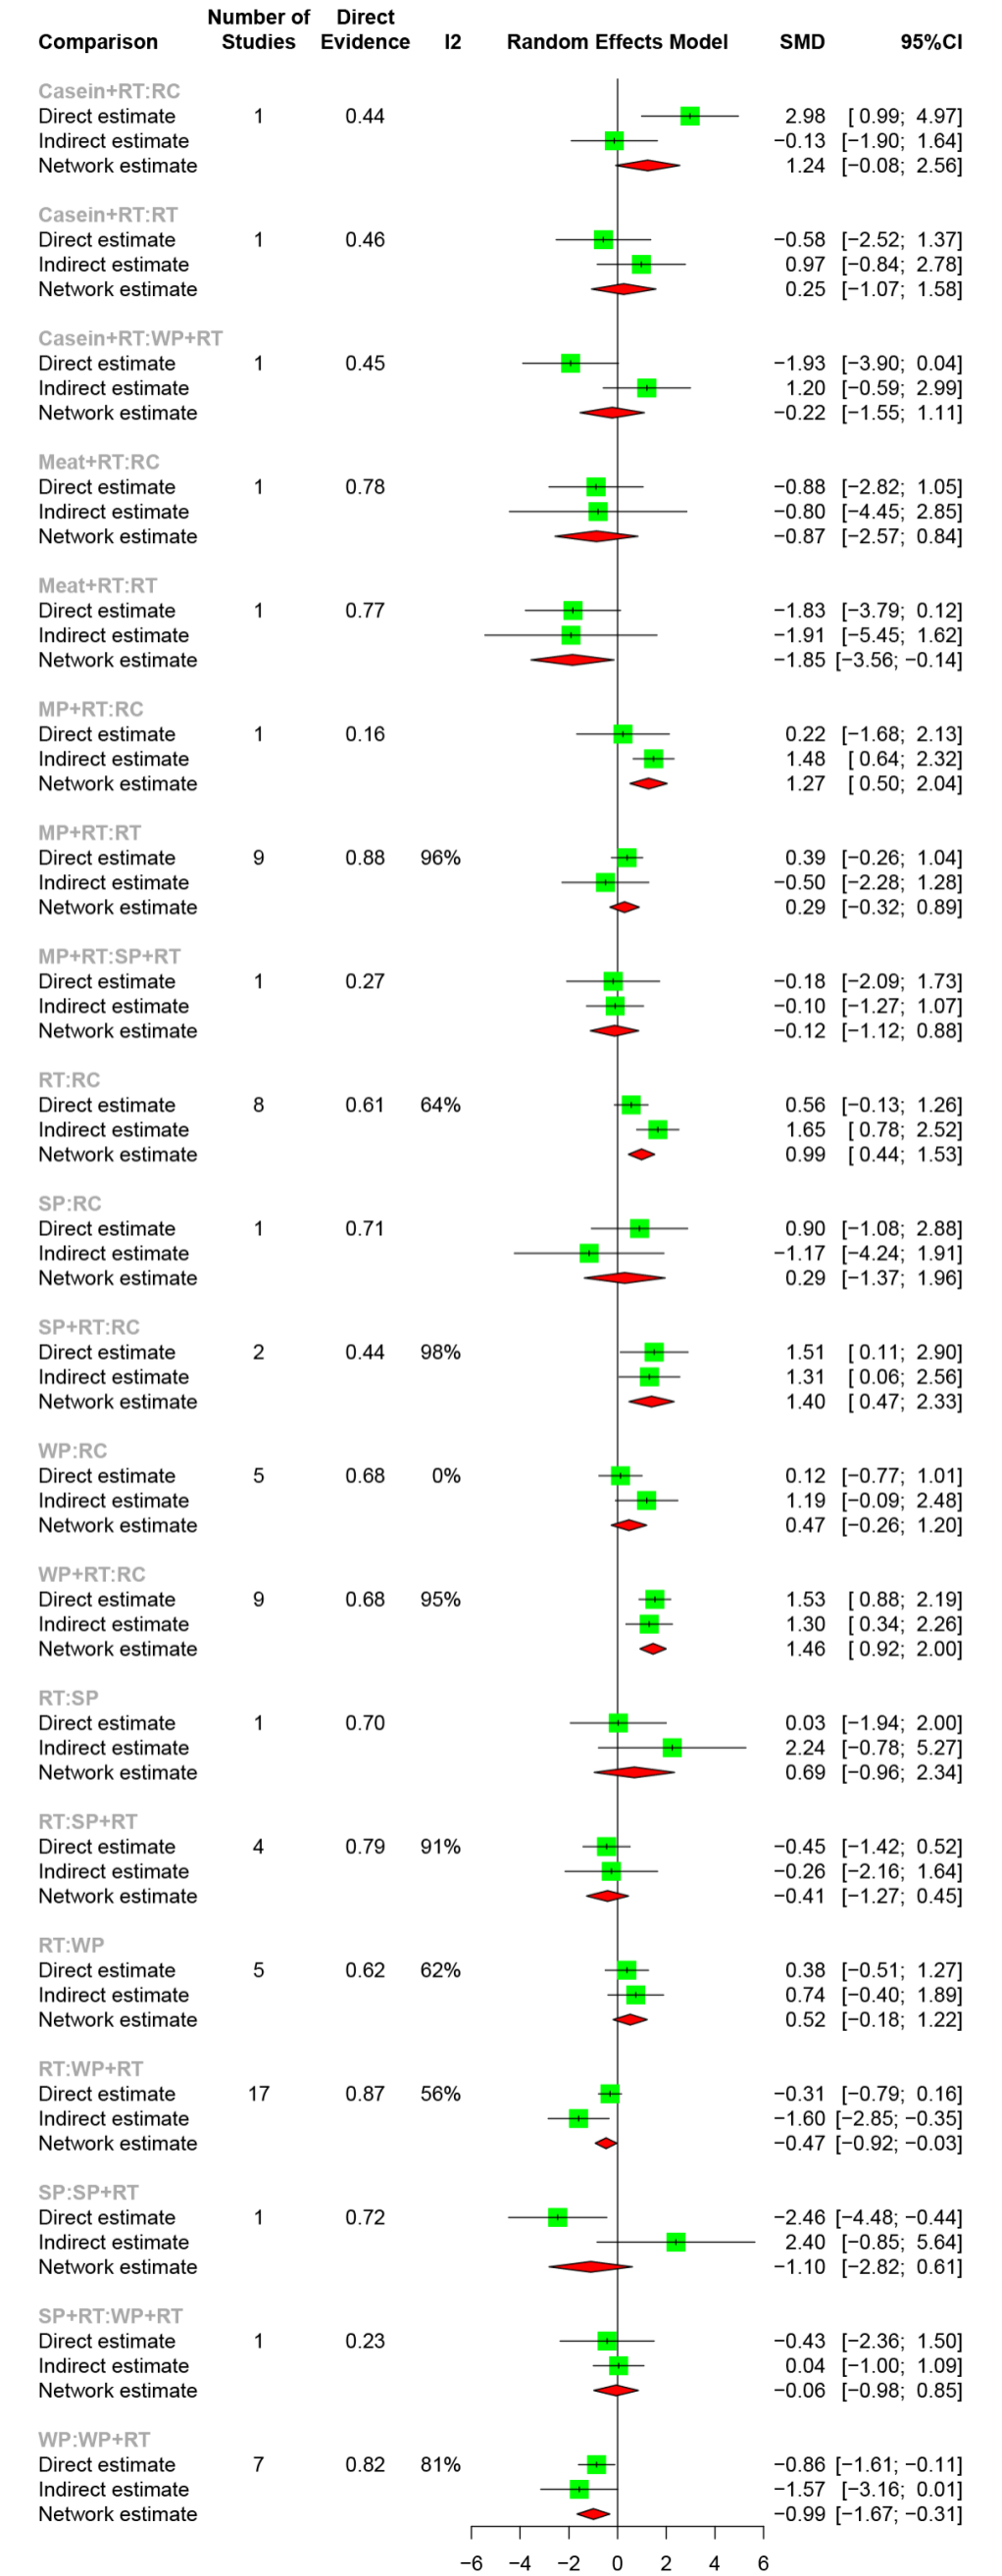

**Figure S5.** Forest plot of node-splitting results for leg strength

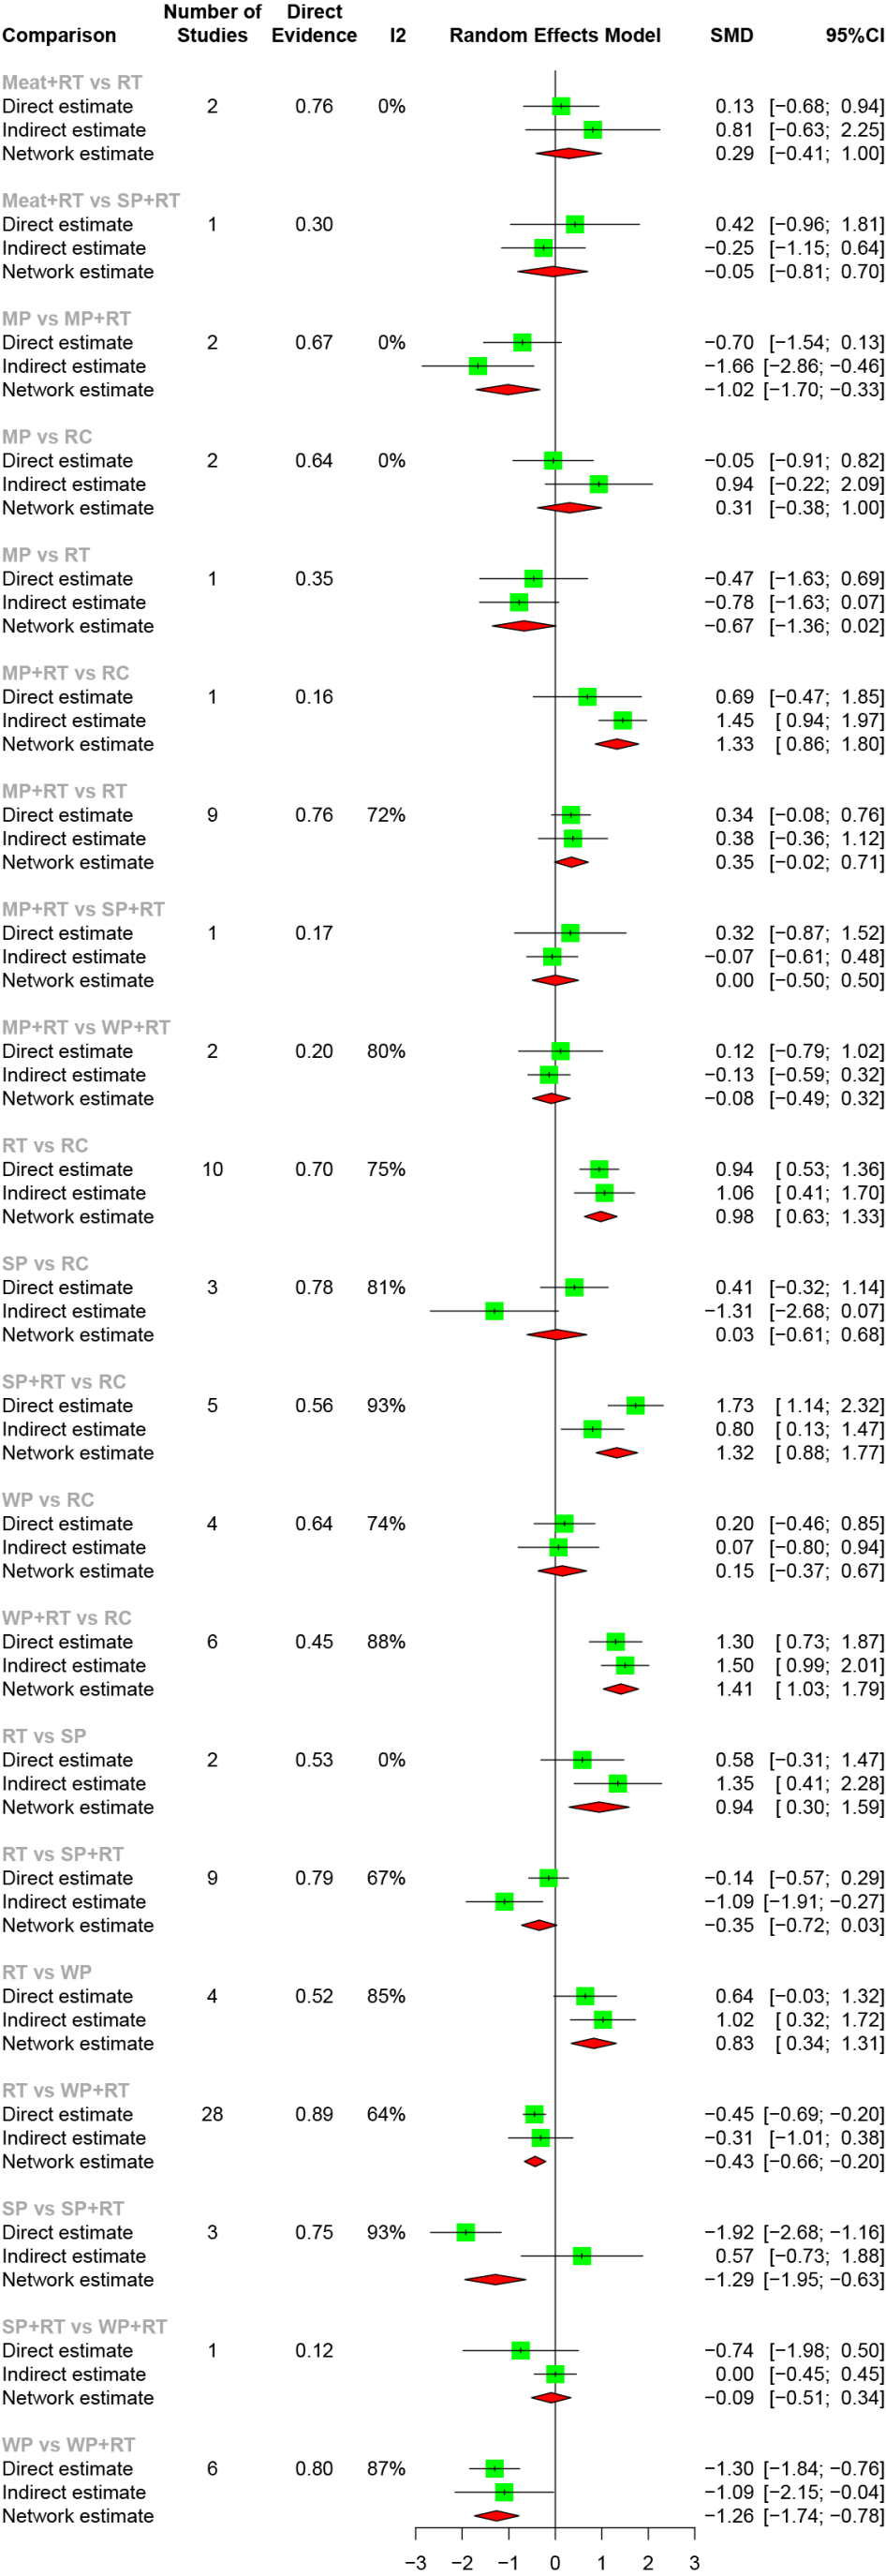

**Supplementary Figure S6.** Relative effects among treatment regimens for handgrip strength at each follow-up time frame

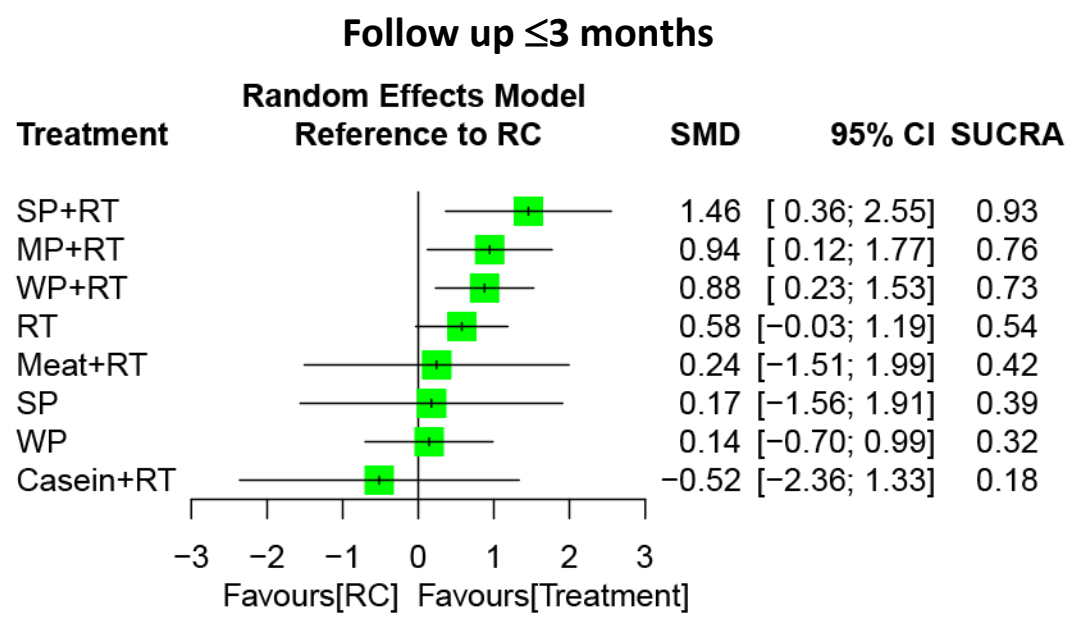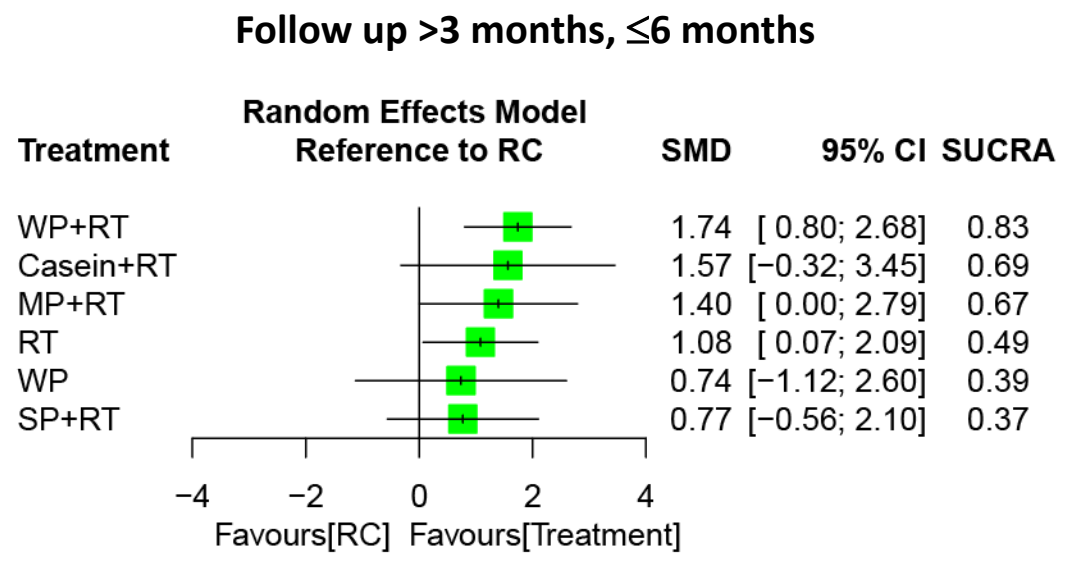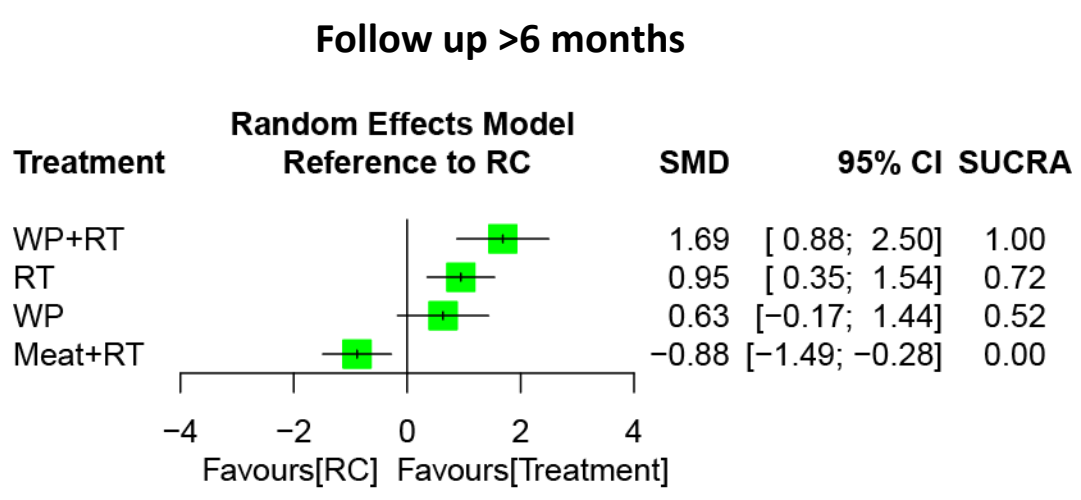

**Supplementary Figure S7.** Relative effects among treatment regimens for leg strength at each follow-up time frame

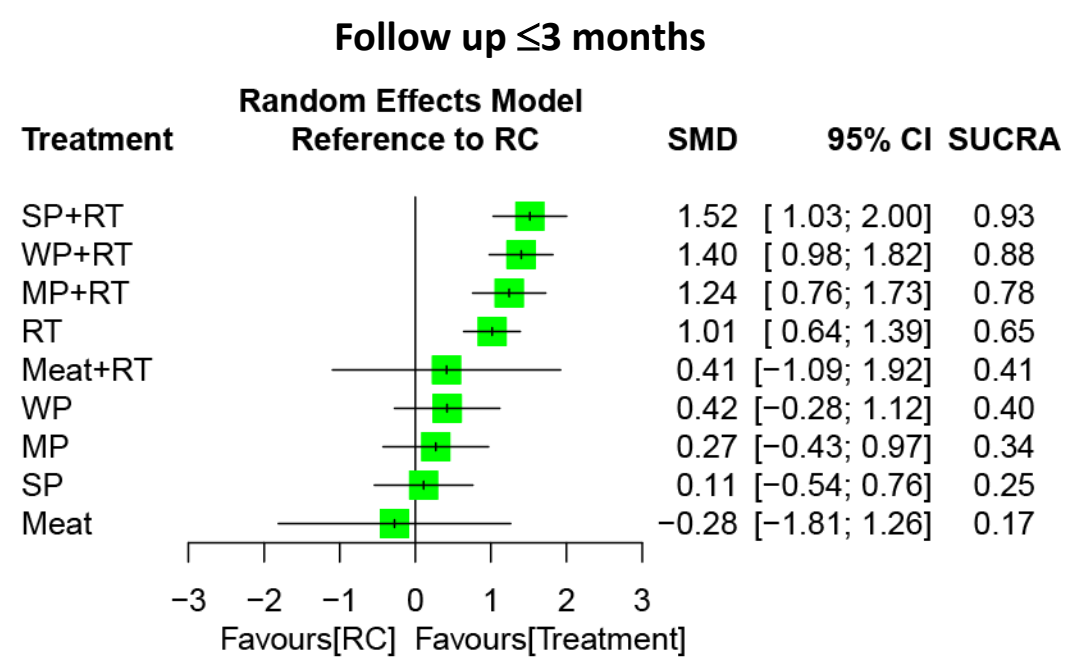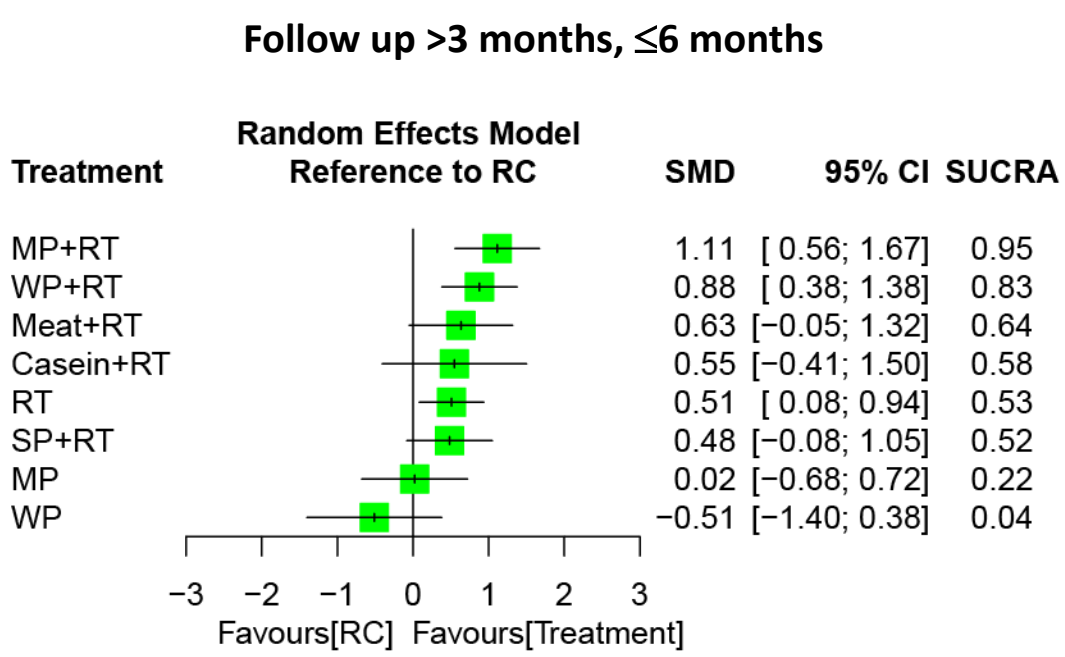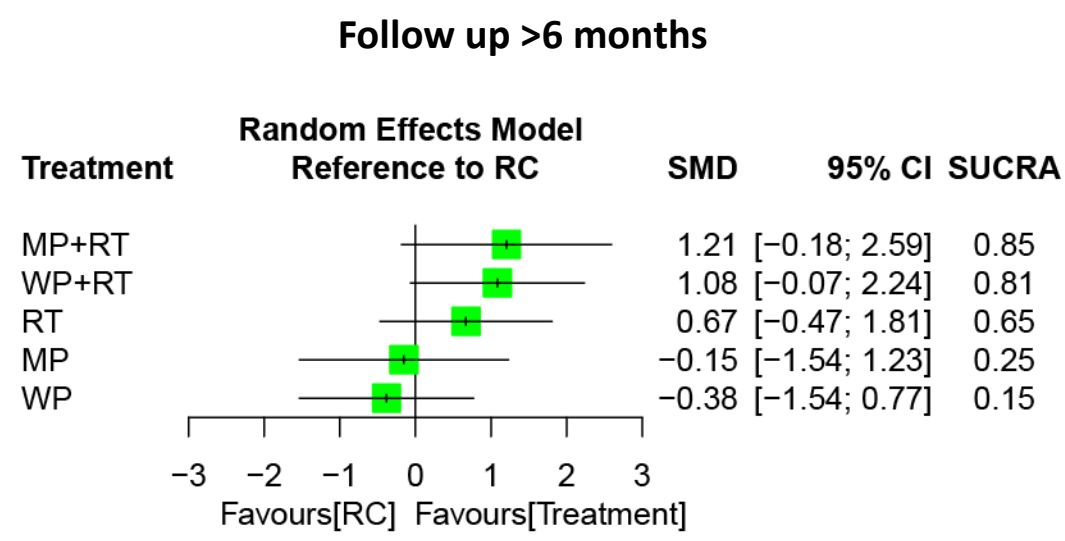

**Supplementary Figure S8.** Relative effects among treatment regimens for walking speed at each follow-up time frame

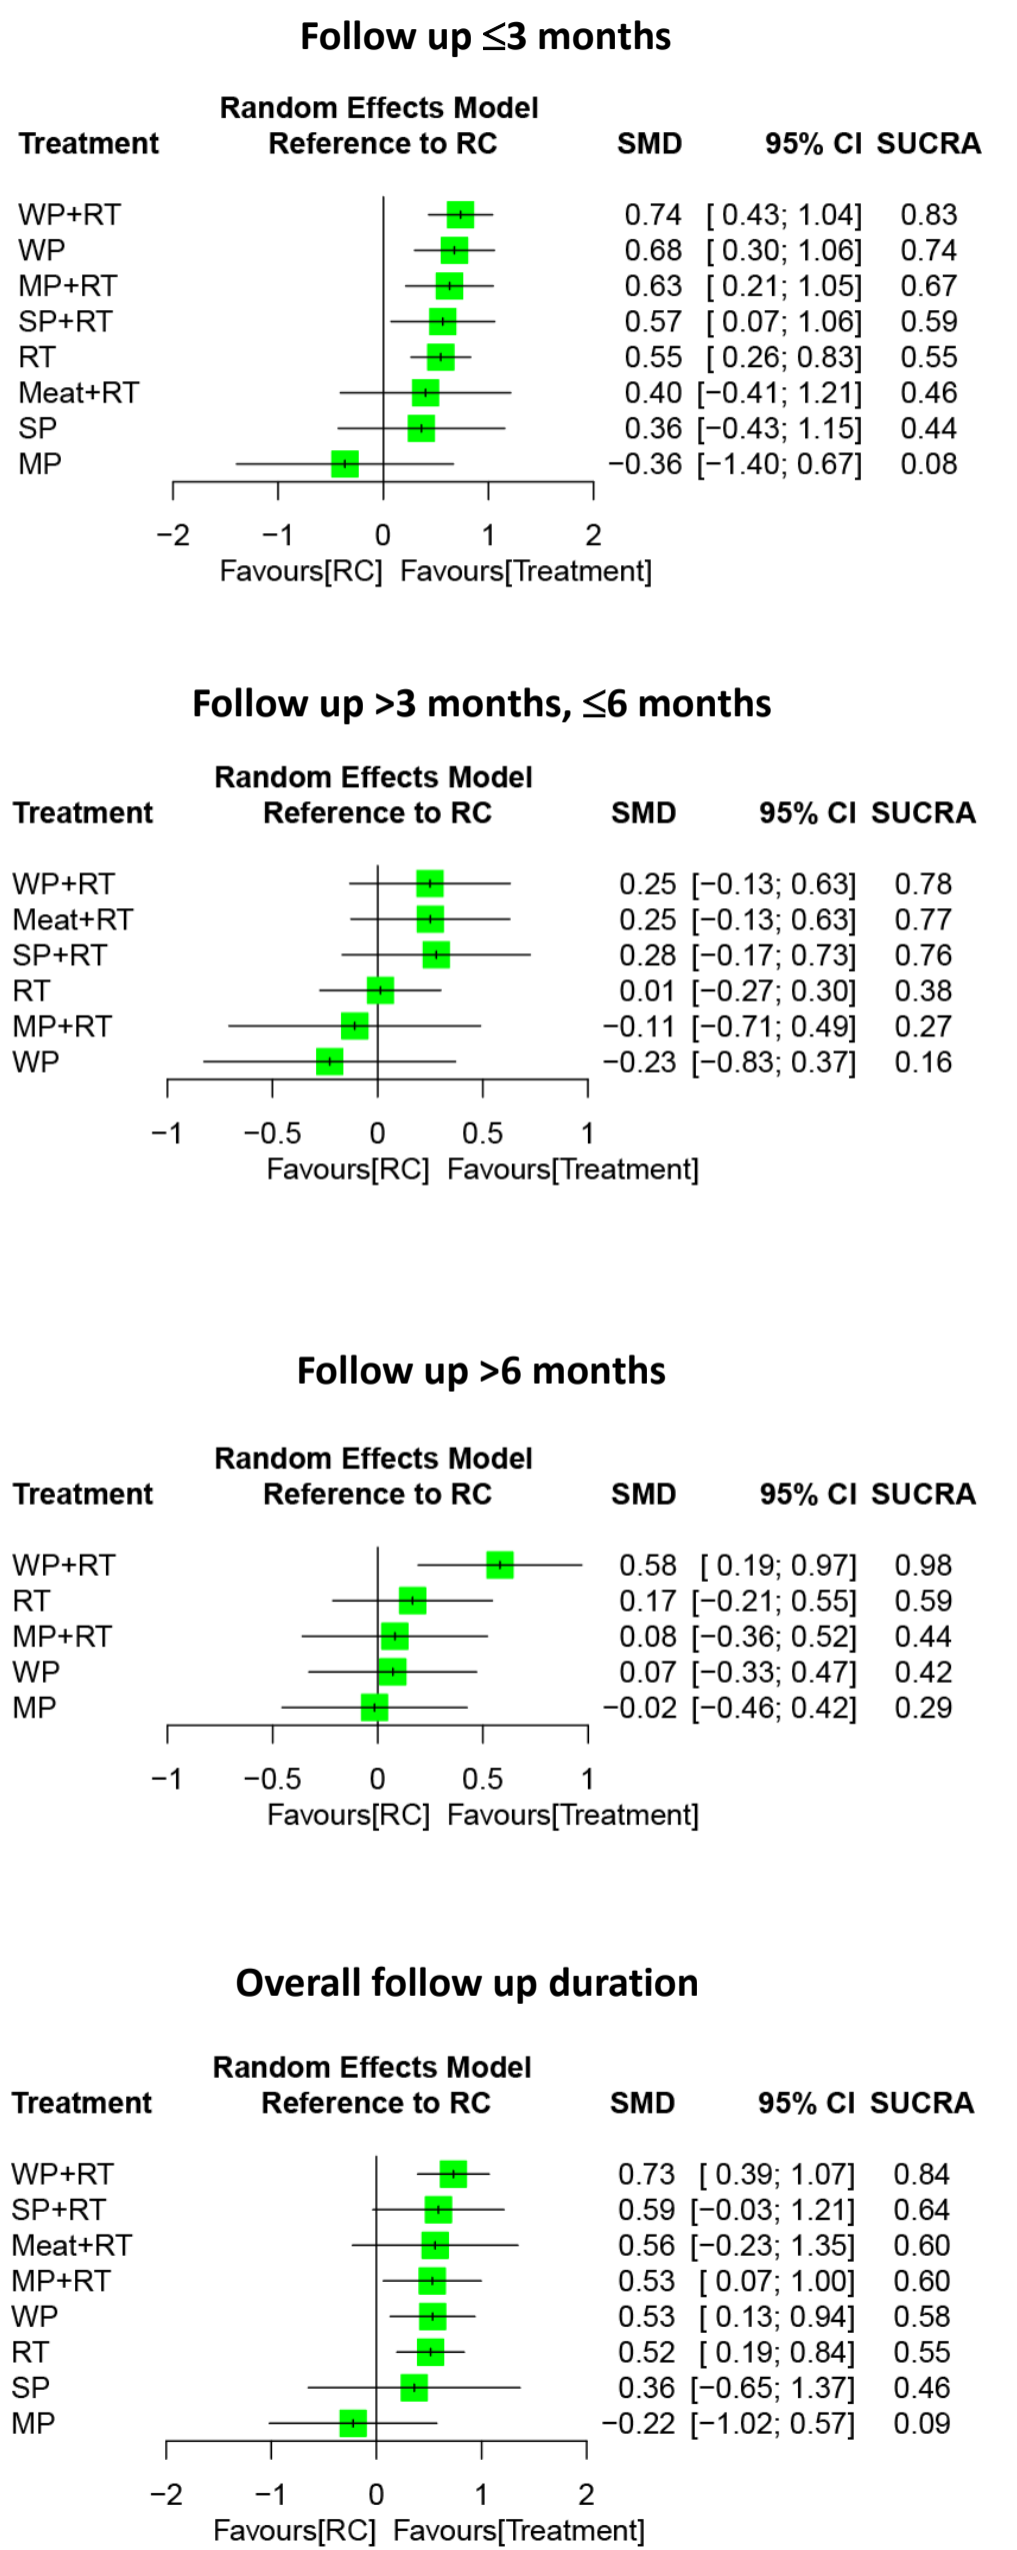

Figure S9. Forest plot of node-splitting results for walking speed

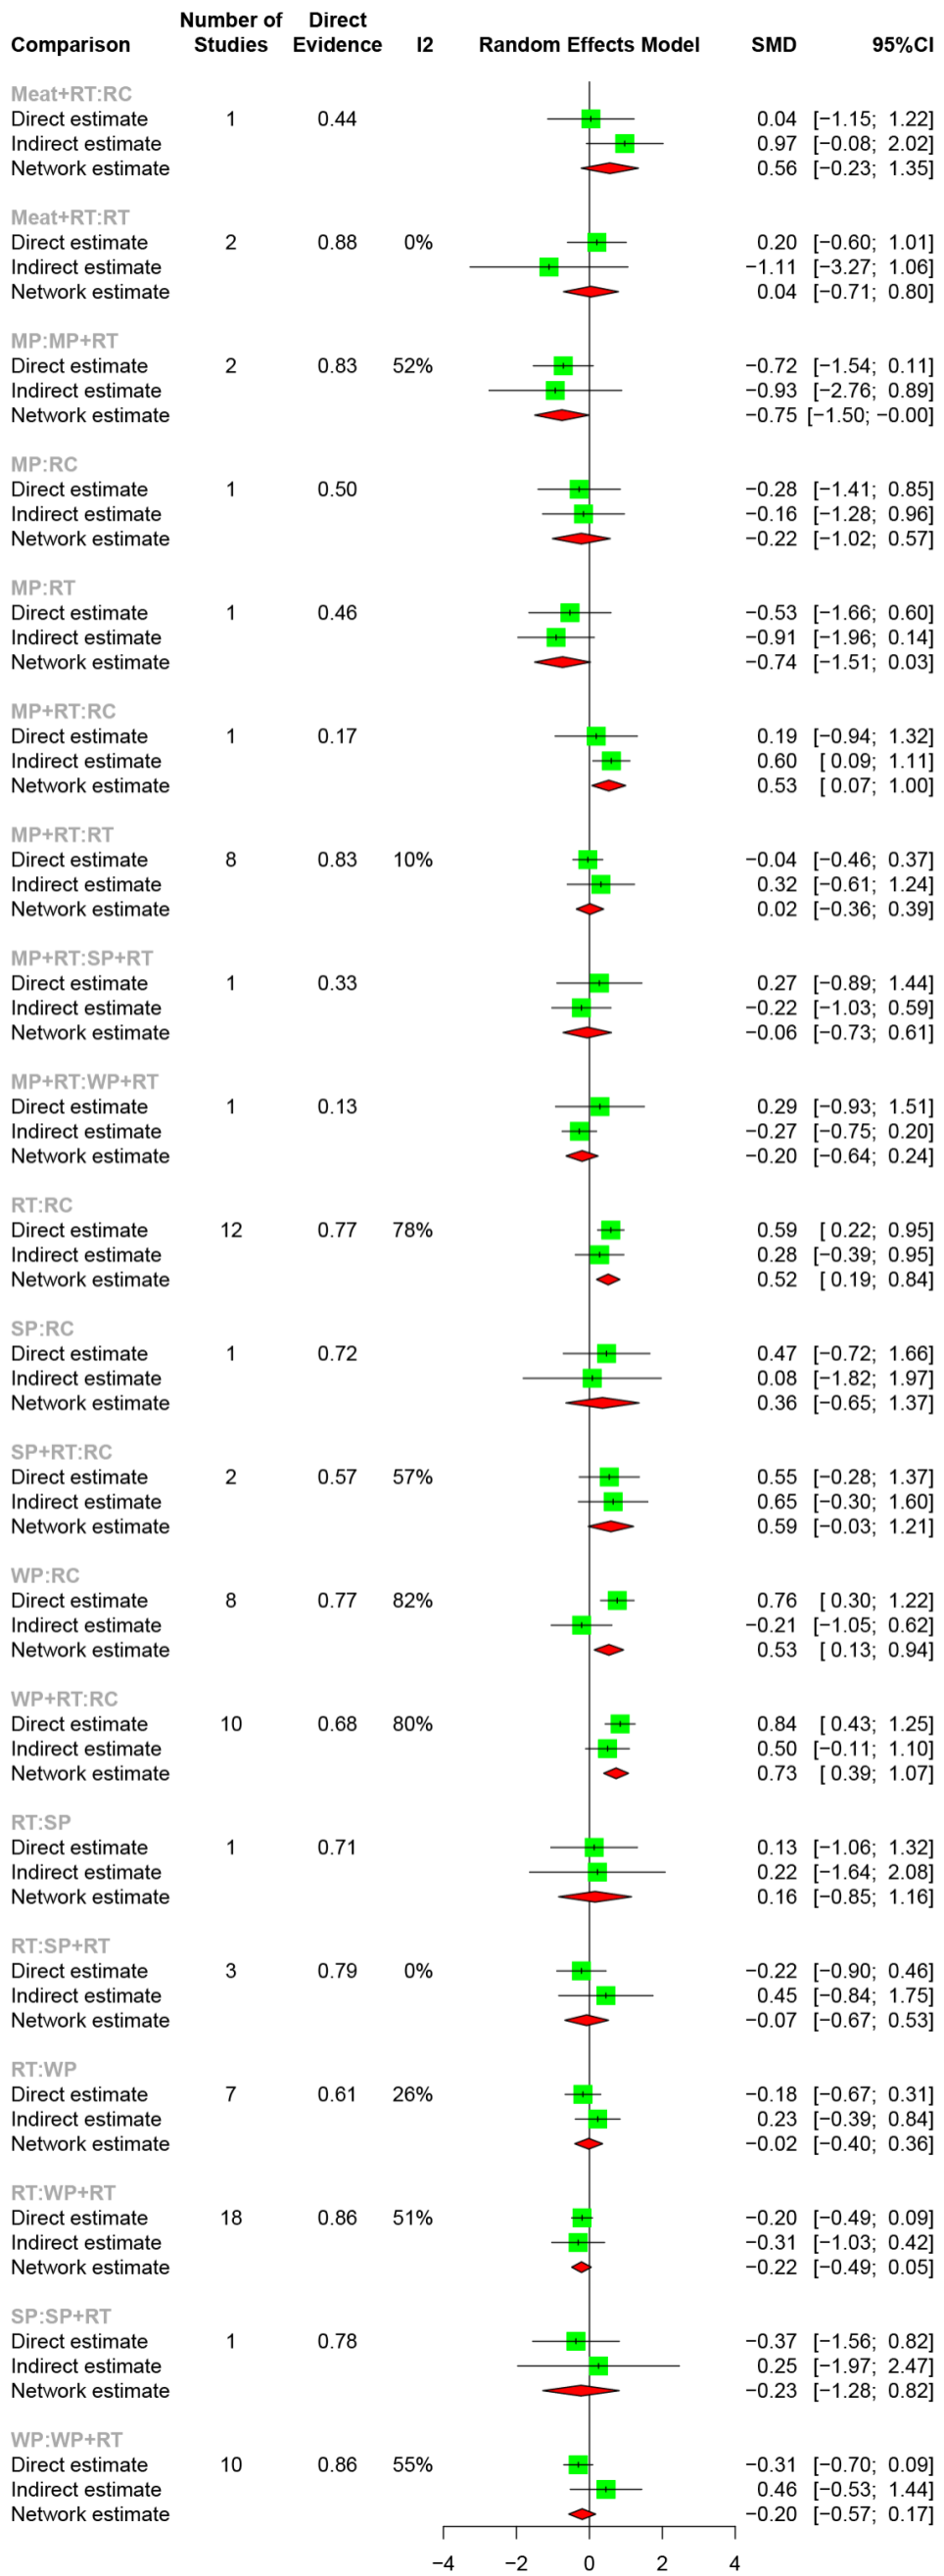

**Supplementary Figure S10.** Relative effects among treatment regimens for chair rise at each follow-up time frame

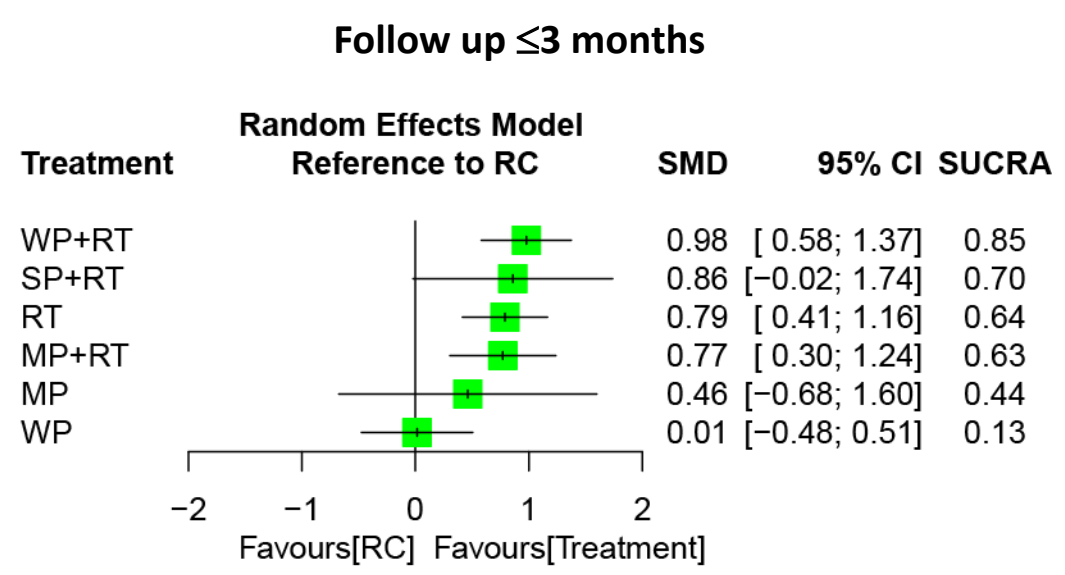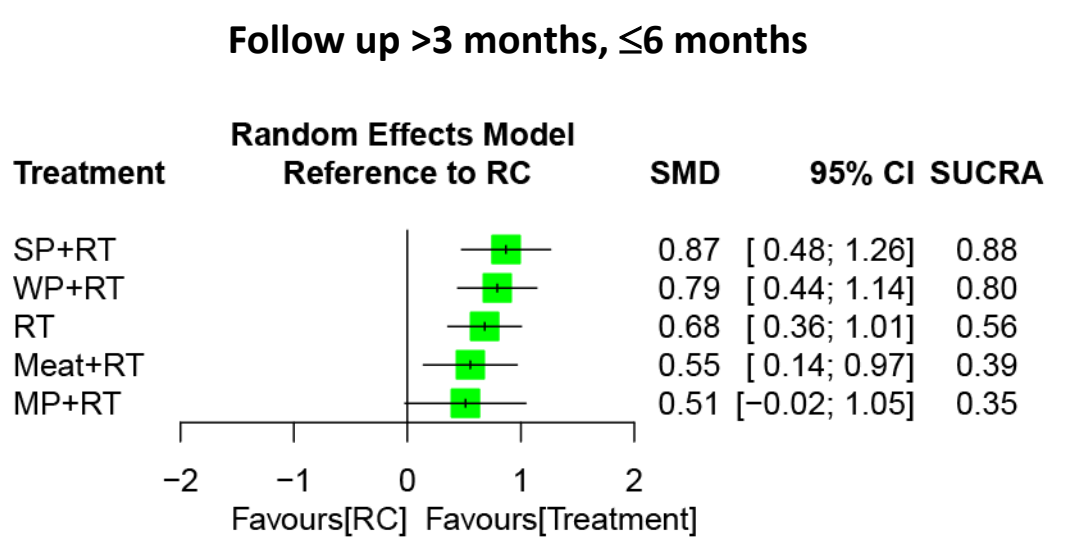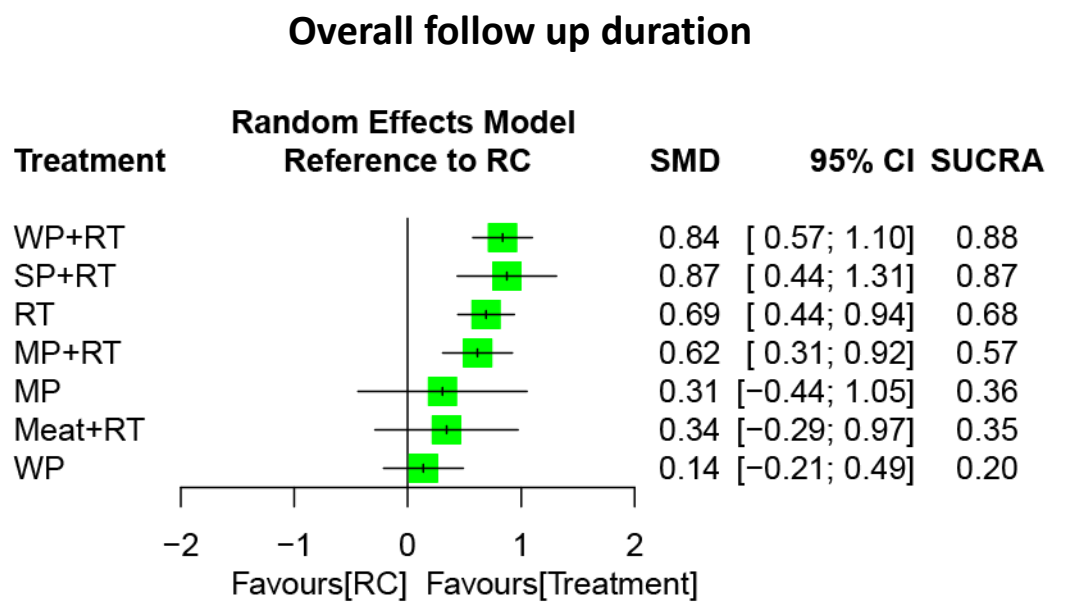

**Figure S11.** Forest plot of node-splitting results for chair rise

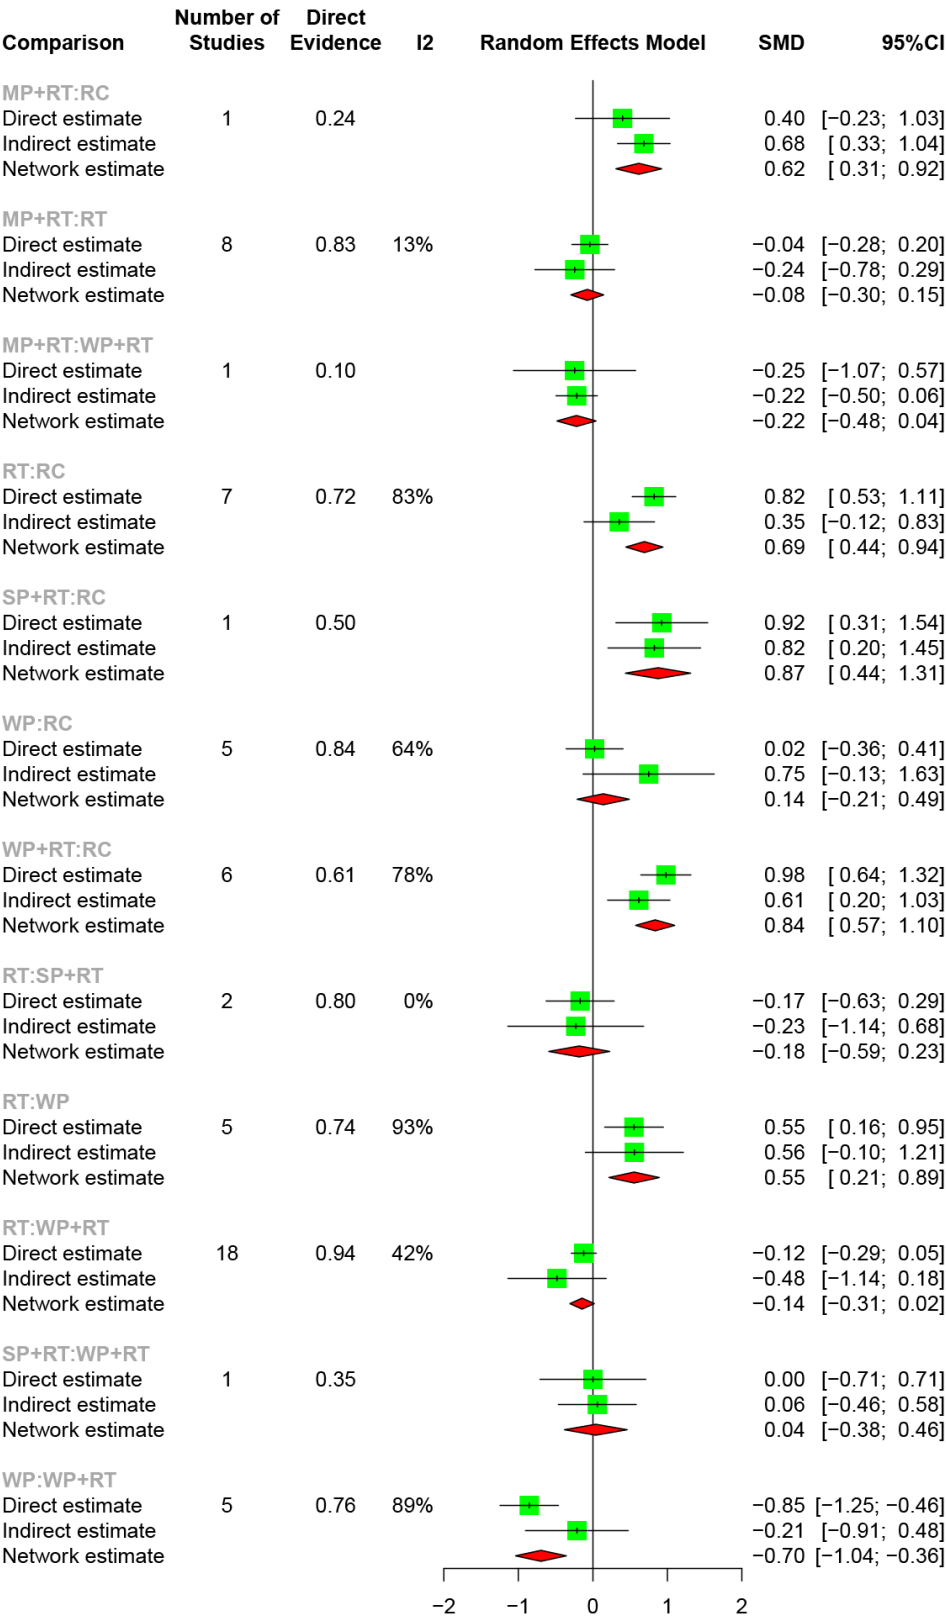

## Supplementary Figure S12. Relative effects among treatment regimens for timed up-and-go task at each follow-up time frame

### Follow up $\leq 3$ months

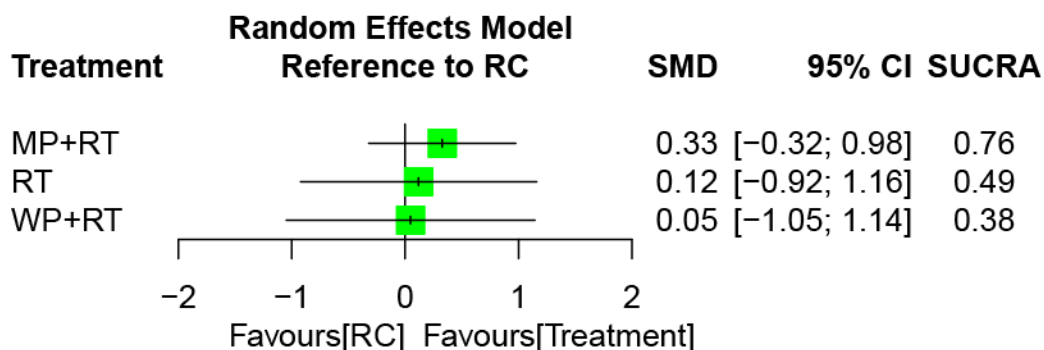

### Follow up $>3$ months, $\leq 6$ months

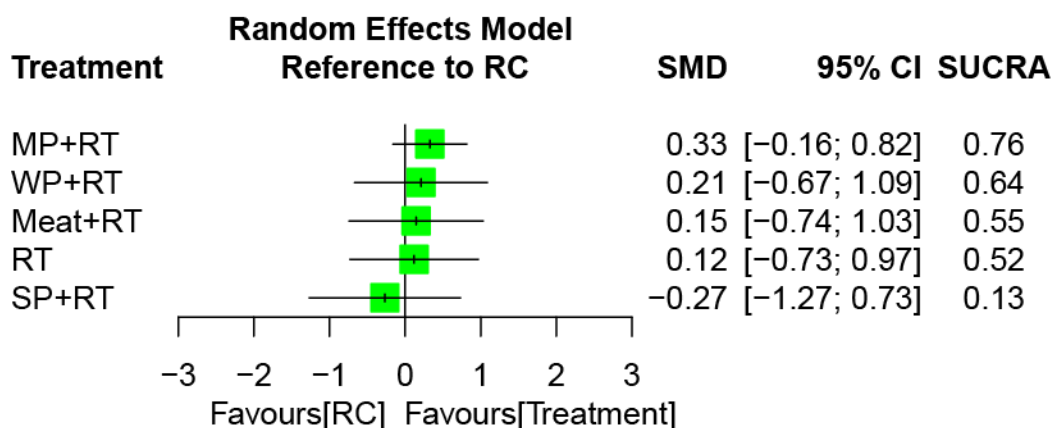

### Overall follow up duration

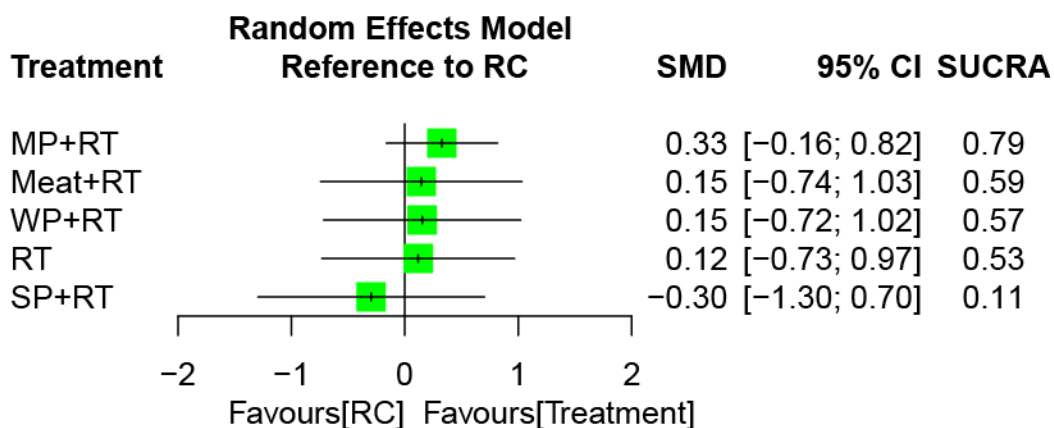

**Figure S13.** Forest plot of node-splitting results for timed up and go

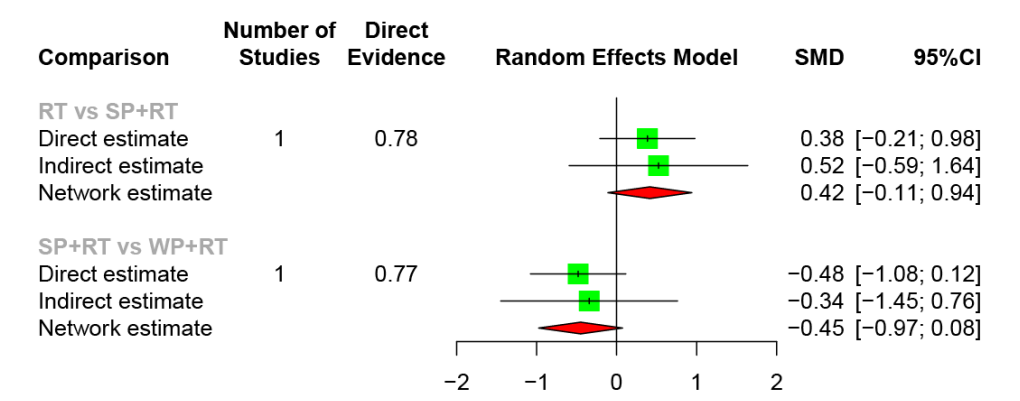

**Supplementary Figure S14.** Relative effects among treatment regimens for Short Physical Performance Battery at each follow-up time frame

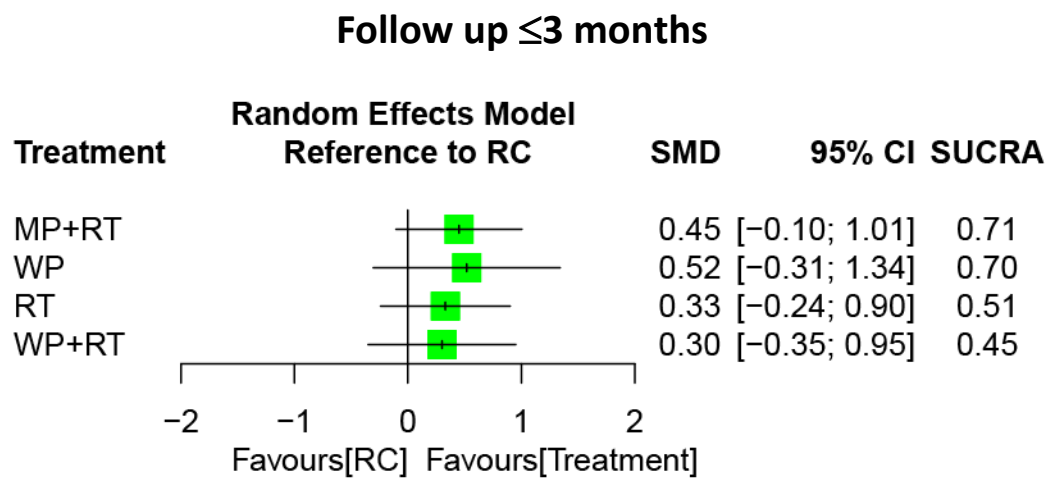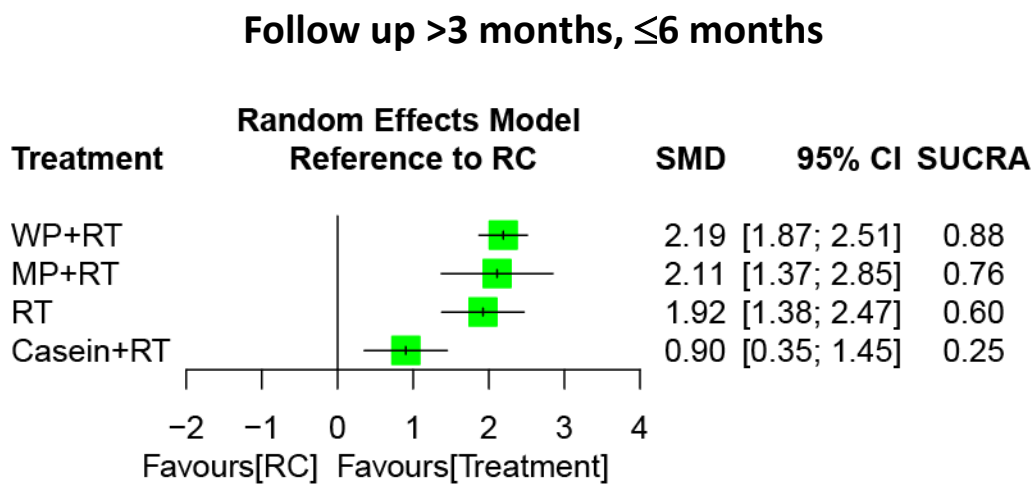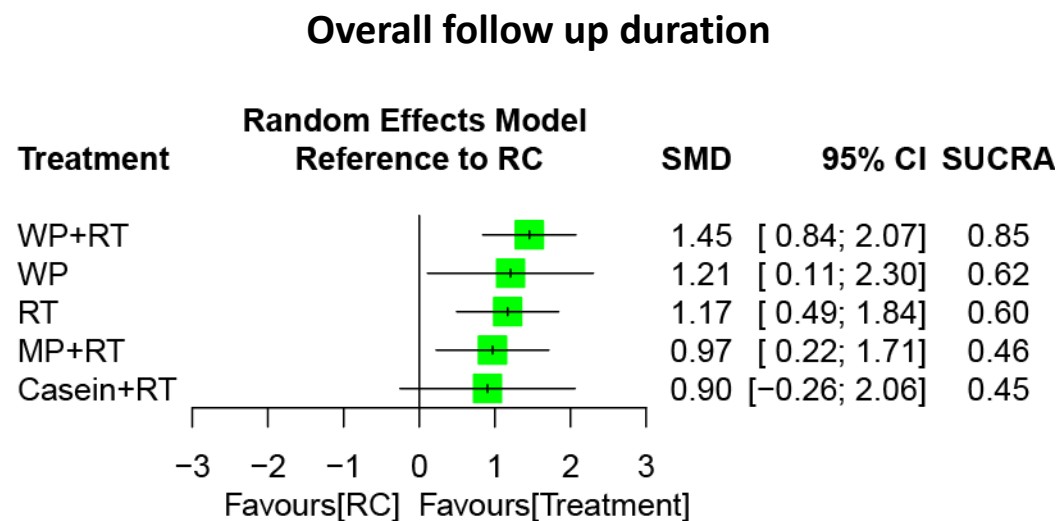

Figure S15. Forest plot of node-splitting results for SPPB

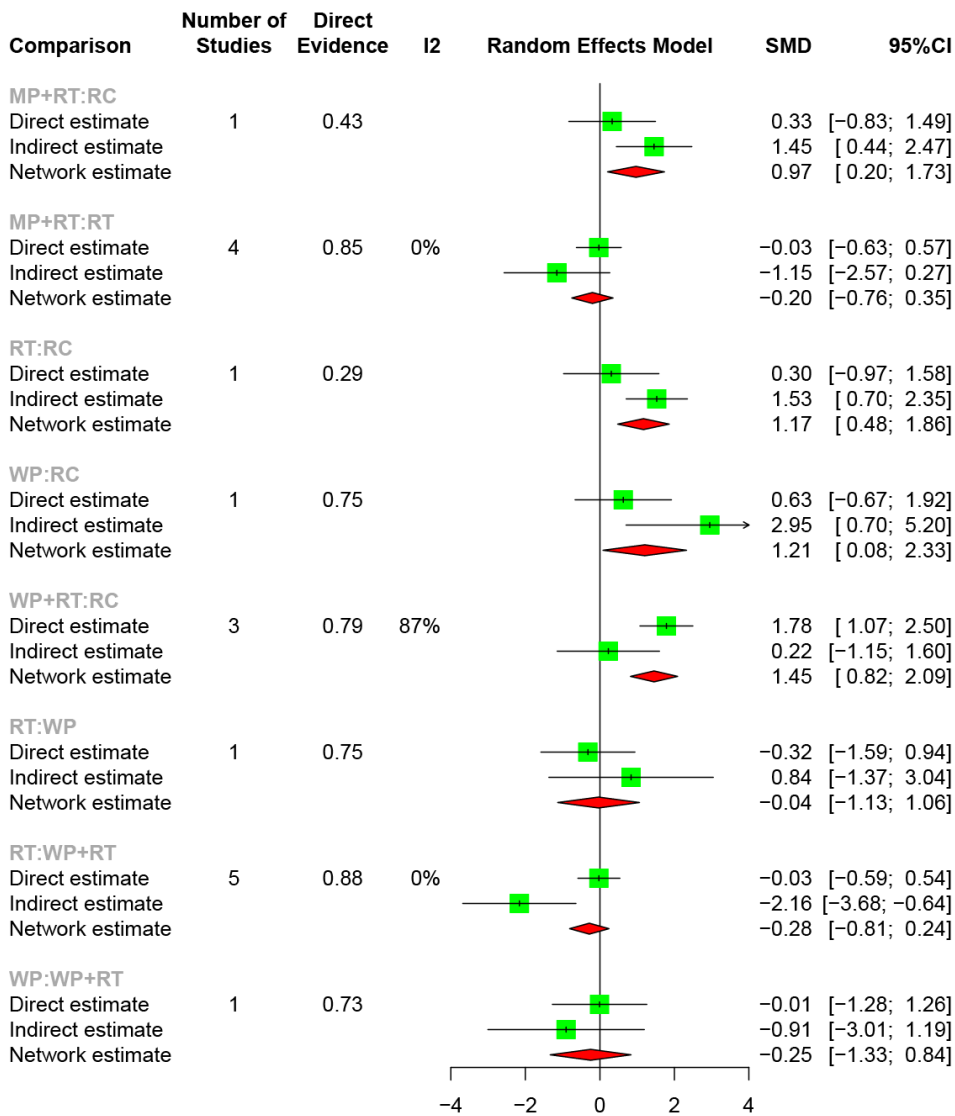

Supplementary figure S16

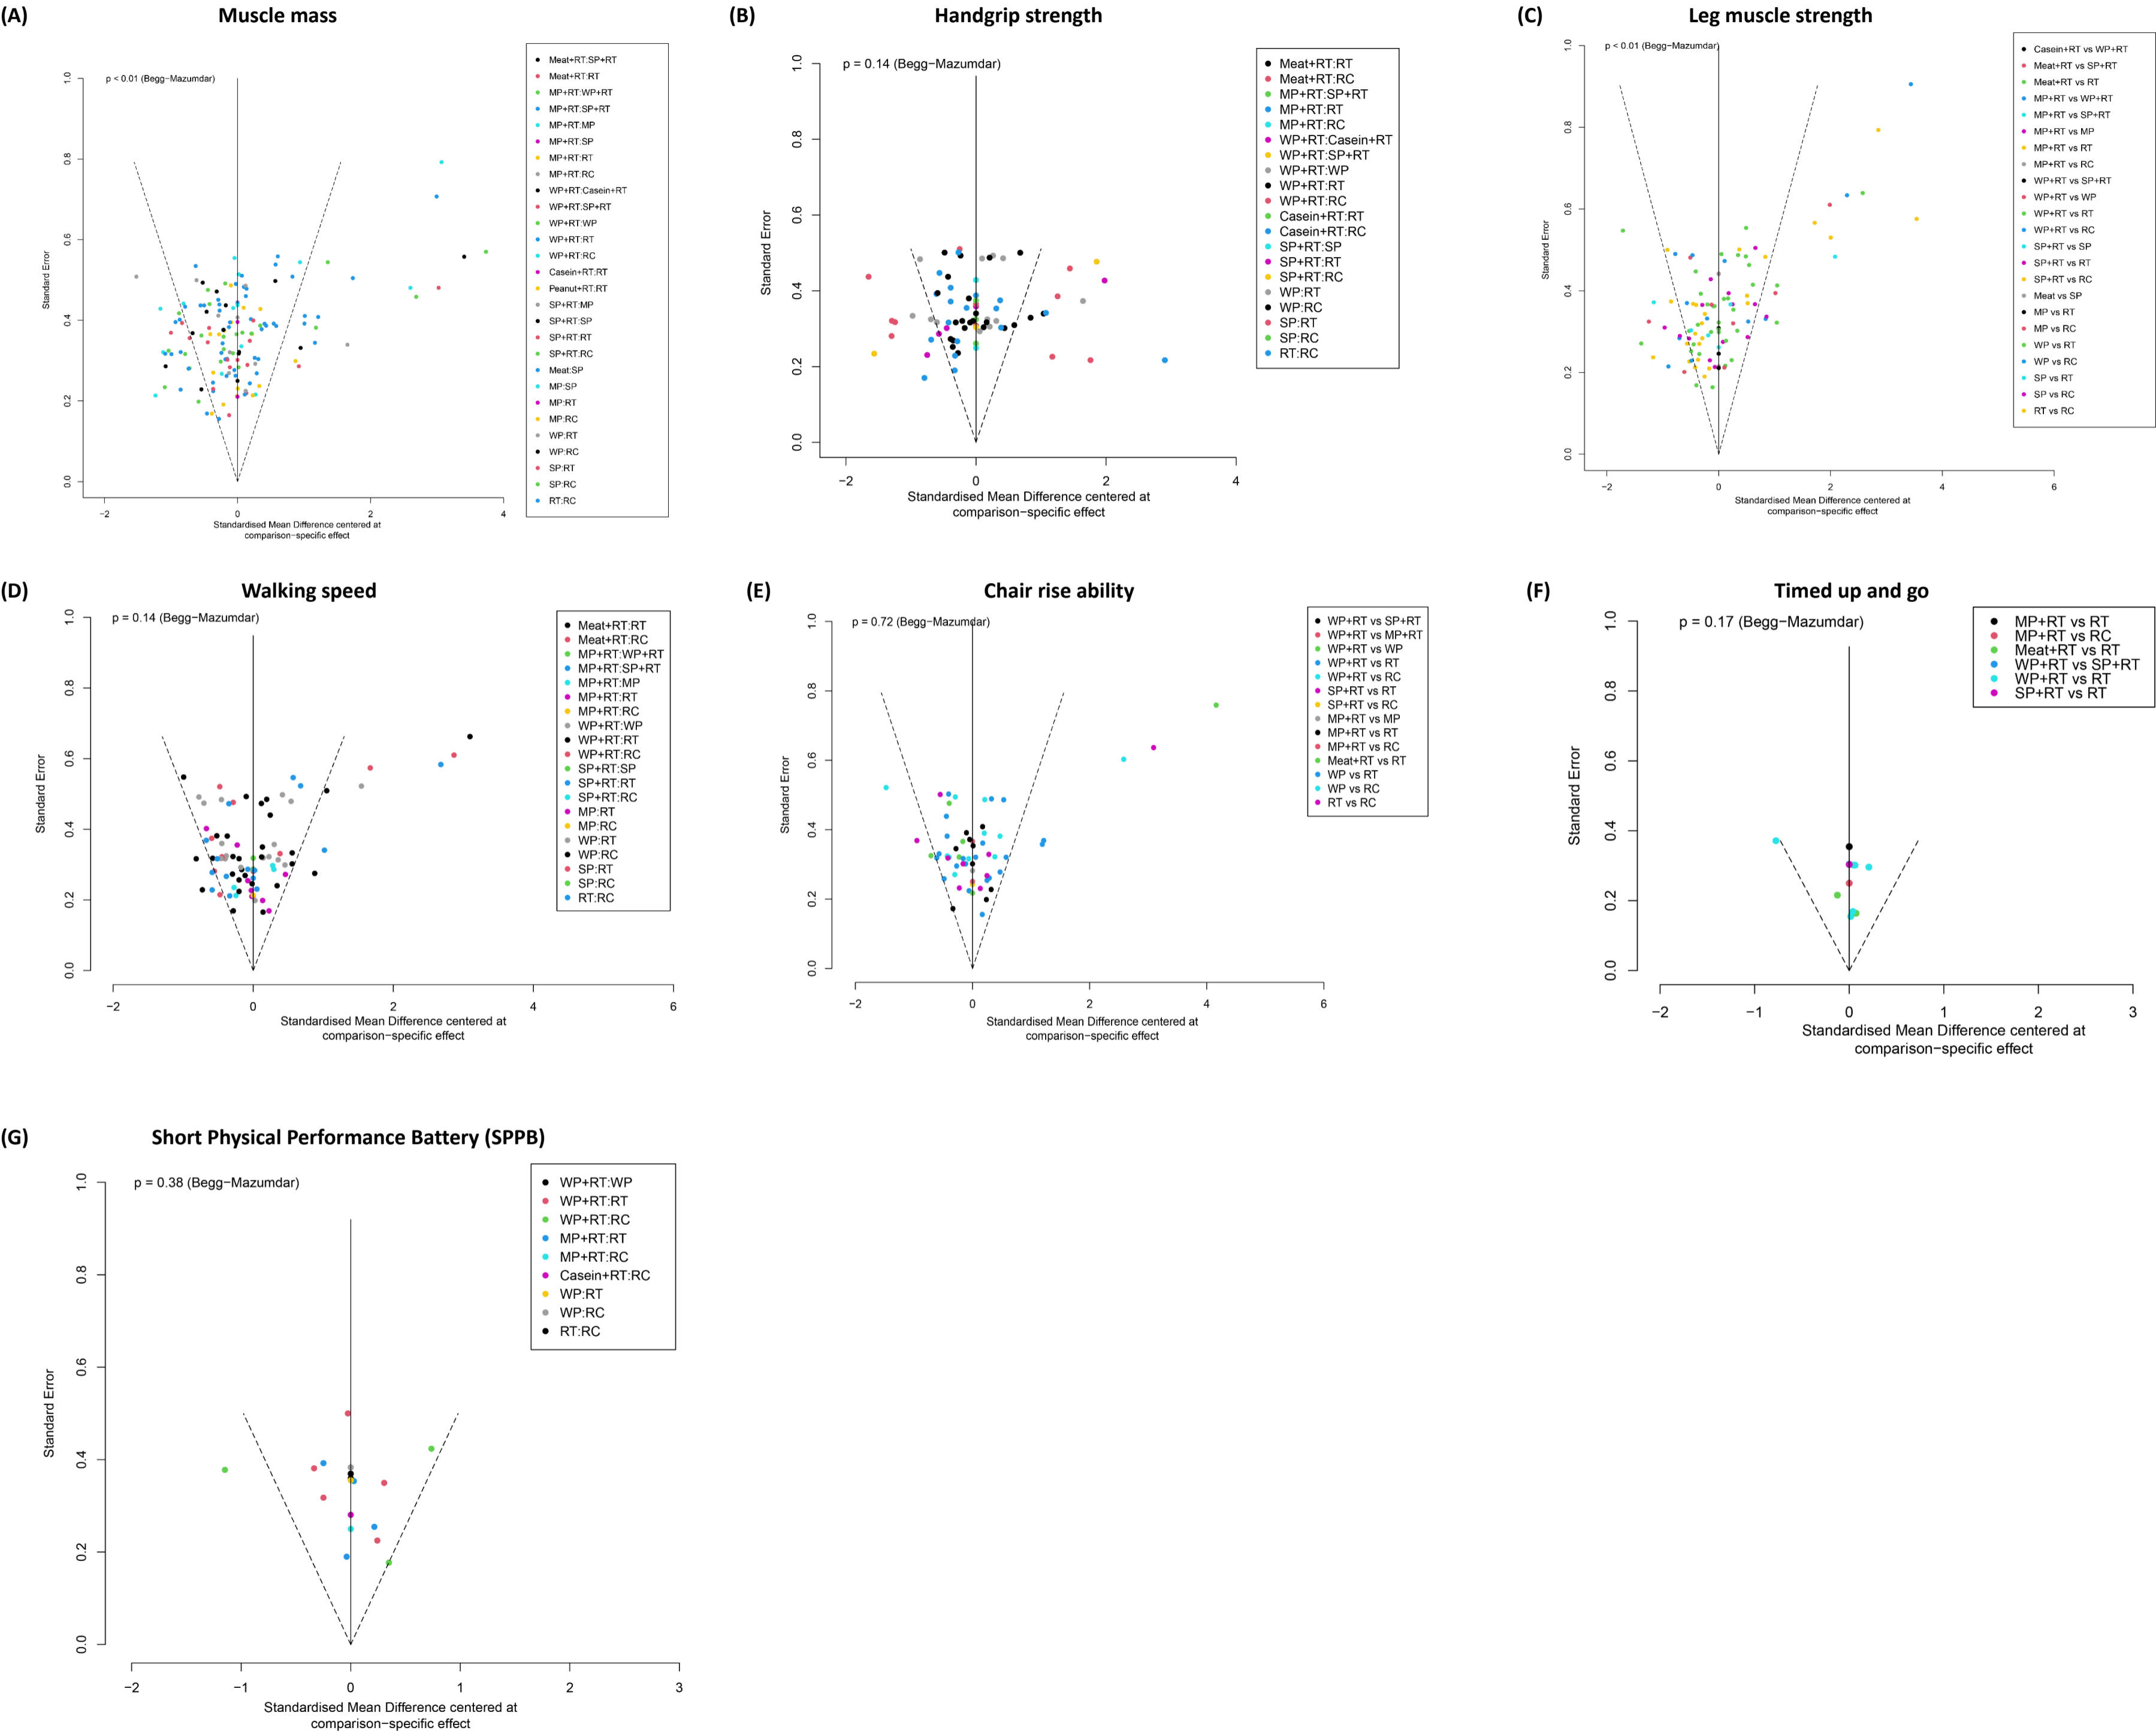

Supplement: s1 [file s1]
