# Supplementary material for: Comparative Efficacy of Different Protein Supplements on Muscle Mass, Strength, and Physical Indices of Sarcopenia among Community-Dwelling, Hospitalized or Institutionalized Older Adults Undergoing Resistance Training: A Network Meta-Analysis of Randomized Controlled Trials
Source: MDPI journal article supplement (doi:10.3390/nu16070941), 2024-03-25
Supplement: s1 [file s1]

**Table S1. Database search formulas**

| <b>Data base</b>                                    | <b>Search terms for query</b>                                                                              |
|-----------------------------------------------------|------------------------------------------------------------------------------------------------------------|
| <b>Pubmed</b>                                       |                                                                                                            |
| #1                                                  | (elder adults) OR order adults                                                                             |
| #2                                                  | ((sarcopenia) OR frailty) OR dynapenia)                                                                    |
| #3                                                  | ((untrained) OR sedentary) OR hospitalized) OR Institutionalized                                           |
| #4                                                  | #1 OR #2 OR #3                                                                                             |
| #5                                                  | ((progressive resistance training) OR resistance exercise) OR strength training) OR strengthening exercise |
| #6                                                  | ((protein supplement) OR protein supplementation) OR dietary protein) OR high-protein diet                 |
| #7                                                  | (Randomized controlled trial) OR Randomization                                                             |
| #8                                                  | ((#4) AND #5) AND #6) AND #7                                                                               |
| <b>Physiotherapy Evidence Database (PEDro)</b>      |                                                                                                            |
|                                                     | Method: clinical trial                                                                                     |
|                                                     | Abstract & Title:                                                                                          |
| #1                                                  | order adults                                                                                               |
| #2                                                  | sarcopenia                                                                                                 |
| #3                                                  | frailty                                                                                                    |
| #4                                                  | resistance training                                                                                        |
| #5                                                  | strengthening exercise                                                                                     |
| #6                                                  | Strength training                                                                                          |
| #7                                                  | protein supplementation                                                                                    |
| #8                                                  | high-protein diet                                                                                          |
| #9                                                  | dietary protein                                                                                            |
| <b>China knowledge resource integrated database</b> |                                                                                                            |
| #1                                                  | order adults                                                                                               |
| #2                                                  | resistance exercise training                                                                               |
| #3                                                  | protein supplementation                                                                                    |
| #4                                                  | randomized controlled trial                                                                                |
| #5                                                  | #1 AND #2 AND #3 AND #4                                                                                    |

(continued)

**Table S1. (continued)**

| <b>Data base</b>                         | <b>Search terms for query</b>                                                                                                  |
|------------------------------------------|--------------------------------------------------------------------------------------------------------------------------------|
| <b>Excerpta Medica dataBASE (EMBASE)</b> |                                                                                                                                |
| #1                                       | order adults                                                                                                                   |
| #2                                       | sarcopenia                                                                                                                     |
| #3                                       | frailty                                                                                                                        |
| #4                                       | dynapenia                                                                                                                      |
| #5                                       | sedentary/untrained                                                                                                            |
| #6                                       | strengthening exercise                                                                                                         |
| #7                                       | resistance training                                                                                                            |
| #8                                       | strength training                                                                                                              |
| #9                                       | protein supplementation                                                                                                        |
| #10                                      | dietary protein                                                                                                                |
| #11                                      | #1 OR #2 OR #3 OR #4 OR #5                                                                                                     |
| #12                                      | #6 OR #7 OR #8                                                                                                                 |
| #13                                      | #9 OR #10                                                                                                                      |
| #14                                      | #14 AND #15 AND #16 AND ([systematic review]/lim OR [meta analysis]/lim OR [randomized controlled trial]/lim) AND [humans]/lim |
| <b>Cochrane Library Database</b>         |                                                                                                                                |
| #1                                       | order adults                                                                                                                   |
| #2                                       | sarcopenia                                                                                                                     |
| #3                                       | frailty                                                                                                                        |
| #4                                       | sedentary/untrained                                                                                                            |
| #5                                       | resistance training                                                                                                            |
| #6                                       | strength exercise training                                                                                                     |
| #7                                       | strengthening exercise                                                                                                         |
| #8                                       | protein supplementation                                                                                                        |
| #9                                       | dietary protein                                                                                                                |
| #10                                      | randomized controlled trial                                                                                                    |
| #11                                      | #1 OR #2 OR #3 OR #4                                                                                                           |
| #12                                      | #5 OR #6 OR #7                                                                                                                 |
| #13                                      | #8 AND #9                                                                                                                      |
| #14                                      | #11 AND #12 AND #13                                                                                                            |
| <b>Google Scholar</b>                    |                                                                                                                                |
| #1                                       | allintitle: elderly OR older adults                                                                                            |
| #2                                       | allintitle: untrained OR sarcopenia OR frailty                                                                                 |
| #3                                       | allintitle: resistance training OR strengthening exercise                                                                      |
| #4                                       | allintitle: "protein supplementation" OR "dietary protein"                                                                     |
| #5                                       | allintitle: randomized controlled trial                                                                                        |

Table S2. Summary of included study characteristics.

| Study (year)<br>(reference<br>number) <sup>a</sup> | Country<br>(area)      | Population                                      | Study arm   | Mean<br>age<br>(years) | Mean<br>BMI<br>(kg/m <sup>2</sup> ) | N        | Sex             |                 | PS intervention                   |                           |                   | RT intervention          |                                 |                    |                   | Outcome measures       |                           |                             |                      |                 |                  |               |       | Measured<br>time point<br>(week) |       |
|----------------------------------------------------|------------------------|-------------------------------------------------|-------------|------------------------|-------------------------------------|----------|-----------------|-----------------|-----------------------------------|---------------------------|-------------------|--------------------------|---------------------------------|--------------------|-------------------|------------------------|---------------------------|-----------------------------|----------------------|-----------------|------------------|---------------|-------|----------------------------------|-------|
|                                                    |                        |                                                 |             |                        |                                     |          | Female          | Male            | Frequency<br>(intake<br>day/week) | Intake<br>amount<br>(g/d) | Compliance<br>(%) | % 1-RM                   | Frequency<br>(session/<br>week) | Duration<br>(week) | Compliance<br>(%) | Muscle mass/volume     |                           |                             | Strength             |                 | Mobility         |               |       |                                  |       |
|                                                    |                        |                                                 |             |                        |                                     |          |                 |                 |                                   |                           |                   |                          |                                 |                    |                   | Wole body<br>lean mass | Appendicular<br>lean mass | CSA/<br>Muscle<br>thickness | Handgrip<br>strength | Leg<br>strength | Walking<br>speed | Chair<br>rise | TUG   |                                  | SPPB  |
| Aas 2019 [1]                                       | Norway<br>(Europe)     | Mobility-limited<br>older adults                | MP+RT<br>RC | 86.6<br>82.6           | 26.1<br>26.3                        | 11<br>11 | 7<br>8          | 4<br>3          | 7                                 | 34                        | NR                | 80–90                    | 3                               | 10                 | 95.8              |                        | V                         | V                           |                      | V               | V                |               | V     | 0, 10                            |       |
| Amasene<br>2019 [2];<br>2021 [3]                   | Span<br>(Europe)       | Post-hospitalized<br>sarcopenic older<br>adults | WP+RT       | 82.9                   | 27.4                                | 21       | 12              | 9               | 2                                 | 20                        | NR                | 70                       | 2                               | 12                 | NR                | V                      | V                         | V                           | V                    |                 | V                | V             |       | V                                | 0, 12 |
|                                                    |                        |                                                 | PLA+RT      | 81.2                   | 31.1                                | 20       | 10              | 10              |                                   |                           |                   |                          |                                 |                    |                   |                        |                           |                             |                      |                 |                  |               |       |                                  |       |
| Arciero 2014 [4]                                   | USA<br>(America)       | Inactive middle-<br>aged adults                 | WP+RT       | 47                     | 29                                  | 22       | 17              | 5               | 4                                 | 60                        | 75                | RPE 7-9/10<br>(10-12 RM) | 4                               | 16                 | 85                | V                      |                           |                             |                      |                 |                  |               |       | 0, 16                            |       |
|                                                    |                        |                                                 | WP          | 50                     | 28                                  | 18       | 11              | 7               |                                   |                           |                   |                          |                                 |                    |                   |                        |                           |                             |                      |                 |                  |               |       |                                  |       |
| Arnarson 2013 [5]                                  | Iceland<br>(Europe)    | Community-<br>dwelling elderly                  | WP+RT       | 73.3                   | 28.1                                | 83       | 94 <sup>b</sup> | 67 <sup>b</sup> | 3                                 | 20                        | NR                | 75-80                    | 3                               | 12                 | NR                | V                      | V                         |                             | V                    | V               |                  | V             |       | 0, 12                            |       |
|                                                    |                        |                                                 | PLA+RT      | 74.6                   | 29.4                                | 78       |                 |                 |                                   |                           |                   |                          |                                 |                    |                   |                        |                           |                             |                      |                 |                  |               |       |                                  |       |
| Bagheri 2022 [6]                                   | Iran<br>(Asia)         | Untrained older<br>adults                       | WP+RT       | 67.3                   | 21.2                                | 14       | 0               | 14              | 7                                 | 18                        | >90               | 60–80                    | 3                               | 8                  | >90               | V                      |                           |                             |                      | V               |                  |               |       | 0, 8                             |       |
|                                                    |                        |                                                 | PLA+RT      | 68.4                   | 21.9                                | 14       | 0               | 14              |                                   |                           |                   |                          |                                 |                    |                   |                        |                           |                             |                      |                 |                  |               |       |                                  |       |
| Bijeh 2022 [7]                                     | Iran<br>(Asia)         | Untrained older<br>adults                       | SP+RT       | 65.6 <sup>c</sup>      | NR                                  | 15       | 0               | 15              | 7                                 | 6.75                      | 100               | 60                       | 3                               | 12                 | 100               | V                      |                           |                             | V                    | V               |                  |               |       | 0, 12                            |       |
|                                                    |                        |                                                 | RT          |                        |                                     | 15       | 0               | 15              |                                   |                           |                   |                          |                                 |                    | 100               |                        |                           |                             |                      |                 |                  |               |       |                                  |       |
|                                                    |                        |                                                 | SP          |                        |                                     | 15       | 0               | 15              |                                   |                           |                   |                          |                                 |                    |                   |                        |                           |                             |                      |                 |                  |               |       |                                  |       |
|                                                    |                        |                                                 | RC          |                        |                                     | 15       | 0               | 15              |                                   |                           |                   |                          |                                 |                    |                   |                        |                           |                             |                      |                 |                  |               |       |                                  |       |
| Candow 2006 [8]                                    | Canada<br>(America)    | Untrained older<br>adults                       | WP+RT       | 64.9                   | 28.3                                | 19       | 0               | 19              | 3                                 | 25                        | NR                | 70                       | 3                               | 12                 | NR                | V                      |                           | V                           |                      | V               |                  |               | 0, 12 |                                  |       |
|                                                    |                        |                                                 | PLA+RT      | 64.6                   | 29.1                                | 10       | 0               | 10              |                                   | (0.3 g/kg/d)              |                   |                          |                                 |                    |                   |                        |                           |                             |                      |                 |                  |               |       |                                  |       |
| Candow 2008 [9]                                    | Canada<br>(America)    | Untrained older<br>adults                       | WP+Cre+RT   | 67.3                   | 26.3                                | 10       | 0               | 10              | 3                                 | 25                        | 94                | 70                       | 3                               | 10                 | NR                | V                      |                           |                             |                      | V               |                  |               | 0, 10 |                                  |       |
|                                                    |                        |                                                 | Cre+RT      | 65.5                   | 28.1                                | 13       | 0               | 13              |                                   | (0.3 g/kg/d)              | 93                |                          |                                 |                    |                   |                        |                           |                             |                      |                 |                  |               |       |                                  |       |
|                                                    |                        |                                                 | PLA+RT      | 64.1                   | 26.1                                | 12       | 0               | 12              |                                   |                           | 95                |                          |                                 |                    |                   |                        |                           |                             |                      |                 |                  |               |       |                                  |       |
| Chale 2013 [10]                                    | USA<br>(America)       | Mobility-limited<br>older adults                | WP+RT       | 78                     | 27                                  | 42       | 25              | 17              | 7                                 | 40                        | 72.1              | 80                       | 3                               | 24                 | 79.9              | V                      |                           | V                           |                      | V               | V                | V             | 0, 24 |                                  |       |
|                                                    |                        |                                                 | PLA+RT      | 77.3                   | 26.9                                | 38       | 22              | 16              |                                   |                           | 82.3              |                          |                                 |                    | 80.2              |                        |                           |                             |                      |                 |                  |               |       |                                  |       |
| Chang 2019 [11]                                    | China<br>(Asia)        | Sarcopenic elderly<br>people                    | Casein+RT   | 73.5                   | 19.8                                | 28       | 6               | 22              | 7                                 | 20                        | NR                | 70                       | 3                               | 24                 | NR                |                        |                           |                             | V                    |                 |                  |               | V     | 0, 24                            |       |
|                                                    |                        |                                                 | RC          | 76.5                   | 19.1                                | 28       | 6               | 22              |                                   |                           |                   |                          |                                 |                    |                   |                        |                           |                             |                      |                 |                  |               |       |                                  |       |
| Chen 2017 [12]                                     | China<br>(Asia)        | Sarcopenic elderly<br>people                    | WP+RT       | 73.5                   | 19.8                                | 20       | 4               | 16              | 7                                 | 25                        | NR                | 70                       | 3                               | 24                 | NR                |                        |                           |                             | V                    |                 |                  |               | V     | 0, 24                            |       |
|                                                    |                        |                                                 | RC          | 76.5                   | 19.1                                | 20       | 4               | 16              |                                   |                           |                   |                          |                                 |                    |                   |                        |                           |                             |                      |                 |                  |               |       |                                  |       |
| Colonetti<br>2023 [13]                             | Brazil<br>(America)    | Institutionalized<br>older adults               | WP+RT       | 73                     | 30.4                                | 8        | 1               | 7               | 3                                 | 30                        | NR                | 70                       | 3                               | 24                 | NR                | V                      | V                         |                             |                      |                 |                  |               |       | 0, 6, 24                         |       |
|                                                    |                        |                                                 | PLA+RT      | 75.4                   | 29.9                                | 10       | 3               | 7               |                                   |                           |                   |                          |                                 |                    |                   |                        |                           |                             |                      |                 |                  |               |       |                                  |       |
|                                                    |                        |                                                 | RC          | 74.1                   | 26.8                                | 8        | 5               | 3               |                                   |                           |                   |                          |                                 |                    |                   |                        |                           |                             |                      |                 |                  |               |       |                                  |       |
| Daly 2014 [14]                                     | Australia<br>(Oceania) | Institutionalized<br>older adults               | Meat+RT     | 72.1                   | 27.7                                | 53       | 53              | 0               | 7                                 | 45                        | 81                | RPE 14-16/20             | 2                               | 16                 | 75                | V                      |                           | V                           |                      | V               | V                |               | 0, 16 |                                  |       |
|                                                    |                        |                                                 | CHO+RT      | 73.6                   | 27.6                                | 47       | 47              | 0               |                                   | (1.3 g/kg/d)              | 100               |                          |                                 |                    | 72                |                        |                           |                             |                      |                 |                  |               |       |                                  |       |

To be continued.

| Table S2. Continued.                               |                        |                                               |                                        |                              |                                     |                      |                      |                      |                                   |                           |                   |                            |                                 |                    |                   |                        |                           |                             |                      |                 |                  |               |     |                                  |       |
|----------------------------------------------------|------------------------|-----------------------------------------------|----------------------------------------|------------------------------|-------------------------------------|----------------------|----------------------|----------------------|-----------------------------------|---------------------------|-------------------|----------------------------|---------------------------------|--------------------|-------------------|------------------------|---------------------------|-----------------------------|----------------------|-----------------|------------------|---------------|-----|----------------------------------|-------|
| Study (year)<br>(reference<br>number) <sup>a</sup> | Country<br>(area)      | Population                                    | Study arm                              | Mean<br>age<br>(years)       | Mean<br>BMI<br>(kg/m <sup>2</sup> ) | N                    | Sex                  |                      | PS intervention                   |                           |                   | RT intervention            |                                 |                    |                   | Outcome measures       |                           |                             |                      |                 |                  |               |     | Measured<br>time point<br>(week) |       |
|                                                    |                        |                                               |                                        |                              |                                     |                      | Female               | Male                 | Frequency<br>(intake<br>day/week) | Intake<br>amount<br>(g/d) | Compliance<br>(%) | % 1-RM                     | Frequency<br>(session/<br>week) | Duration<br>(week) | Compliance<br>(%) | Muscle mass/volume     |                           |                             | Strength             |                 | Mobility         |               |     |                                  |       |
|                                                    |                        |                                               |                                        |                              |                                     |                      |                      |                      |                                   |                           |                   |                            |                                 |                    |                   | Wole body<br>lean mass | Appendicular<br>lean mass | CSA/<br>Muscle<br>thickness | Handgrip<br>strength | Leg<br>strength | Walking<br>speed | Chair<br>rise | TUG |                                  | SPPB  |
| de Azevedo Bach<br>2022 [15]                       | Brazil<br>(America)    | Sedentary older<br>adults                     | WP+RT<br>PLA+RT                        | 66.9<br>65.8                 | 26.3<br>25.4                        | 16<br>15             | NR<br>NR             | NR<br>NR             | 7                                 | 30                        | 97.2<br>97.1      | 75-85 (6-8 RM)             | 2                               | 12                 | 100<br>99         | V                      | V                         |                             | V                    |                 | V                | V             |     | 0, 12                            |       |
| de Carvalho<br>Bastone<br>2020 [16]                | Brazil<br>(America)    | Dynapenic older<br>adults                     | WP+RT<br>RT<br>WP<br>RC                | 76.9<br>77.6<br>76.5<br>72.5 | 25.7<br>26<br>25.9<br>26.2          | 20<br>20<br>20<br>20 | 16<br>12<br>14<br>15 | 4<br>8<br>6<br>5     | 7                                 | 21                        | NR                | 80                         | 3                               | 12                 | 98.5<br>97.2      | V                      |                           |                             | V                    |                 | V                | V             |     | 0, 12                            |       |
| Deer 2019 [17]                                     | USA<br>(America)       | Hospitalized<br>older adults                  | WP+RT<br>PLA+RT<br>WP<br>PLA           | 80<br>77.6<br>80<br>75.7     | 26.1<br>27.4<br>28.9<br>29          | 20<br>21<br>20<br>20 | 14<br>14<br>14<br>14 | 6<br>7<br>6<br>6     | 7                                 | 40                        | 75                | NR (moderate<br>intensity) | 3                               | 4                  | 77                | V                      | V                         |                             |                      |                 | V                | V             |     | V                                | 0, 4  |
| Deibert 2011 [18]                                  | Germany<br>(Europe)    | Untrained middle-<br>aged adults              | SP+RT<br>RT<br>RC                      | 55.9<br>55.5<br>55.8         | 28.4<br>27.7<br>27.2                | 13<br>13<br>9        | 0<br>0<br>0          | 13<br>13<br>9        | 7                                 | 26.7                      | NR<br>NR          | NR (10 RM)                 | 2                               | 12                 | 90<br>90          | V                      |                           |                             |                      | V               |                  |               |     |                                  | 0, 12 |
| Duff 2014 [19]                                     | Canada<br>(America)    | Untrained older<br>adults                     | MP+RT<br>WP+RT                         | 61.8<br>57.5                 | 26.9<br>25.9                        | 19<br>21             | 12<br>13             | 7<br>8               | 7                                 | 38                        | 97<br>88          | NR (8-12 RM)               | 3                               | 8                  | 86<br>84          | V                      |                           | V                           |                      | V               |                  |               |     |                                  | 0, 8  |
| Dulac 2021 [20]                                    | Canada<br>(America)    | Sedentary older<br>adults                     | WP+RT<br>Casein+RT<br>PLA+RT           | 68.3<br>69<br>70.7           | 26.7<br>26<br>25.4                  | 21<br>20<br>19       | 0<br>0<br>0          | 21<br>20<br>19       | 7                                 | 30                        | NR                | 80<br>(RPE 8-10/10)        | 3                               | 12                 | NR                | V                      | V                         | V                           | V                    | V               | V                | V             | V   |                                  | 0, 12 |
| Eliot 2008 [21];<br>Bemben 2010 [22]               | USA<br>(America)       | Untrained middle-<br>aged and older<br>adults | WP+Cre+RT<br>WP+RT<br>Cre+RT<br>PLA+RT | 57.2<br>58.2<br>56.1<br>56.1 | 28.7<br>28.6<br>29.1<br>31.3        | 11<br>11<br>10<br>10 | 0<br>0<br>0<br>0     | 11<br>11<br>10<br>10 | 3                                 | 35                        | 100               | 80                         | 3                               | 14                 | 100               | V                      | V                         |                             | V                    |                 |                  |               |     |                                  | 0, 14 |
| Fiatarone 1994 [23]                                | USA<br>(America)       | Institutionalized<br>elderly                  | SP+RT<br>PLA+RT<br>SP<br>PLA           | 87.2<br>86.2<br>85.7<br>89.2 | 24.5<br>24.9<br>25.4<br>25.8        | 25<br>25<br>24<br>26 | 16<br>16<br>17<br>14 | 9<br>9<br>7<br>12    | 7                                 | 40                        | 99                | 80                         | 3                               | 10                 | 97                | V                      |                           | V                           |                      | V               | V                |               |     |                                  | 0, 10 |
| Formica 2020 [24]                                  | Australia<br>(Oceania) | Community-dwelling<br>elderly                 | Meat+RT<br>RT                          | 71.2<br>70.3                 | 27.8<br>27.9                        | 77<br>77             | 48<br>48             | 29<br>29             | 3                                 | 45<br>(1.3 g/kg/d)        | NR                | RPE 5-8/10                 | 3                               | 24                 | 77.9<br>78.6      | V                      | V                         | V                           |                      | V               | V                | V             | V   |                                  | 0, 24 |
| Francis 2017 [25]                                  | UK<br>(Europe)         | Untrained free-<br>living older adults        | MP+RT<br>MP                            | 60.4<br>61.8                 | 24.7<br>26.1                        | 29<br>28             | 29<br>28             | 0<br>0               | 7                                 | 24<br>(0.33 g/kg/d)       | 86<br>82          | NR (8-15 RM)               | 3                               | 12                 | NR                | V                      | V                         |                             | V                    | V               | V                |               |     |                                  | 0, 12 |

To be continued.

Table S2. Continued.

| Study (year)<br>(reference<br>number) <sup>a</sup> | Country<br>(area)       | Population                             | Study arm     | Mean<br>age<br>(years) | Mean<br>BMI<br>(kg/m <sup>2</sup> ) | N  | Sex    |      | PS intervention                   |                           |                   | RT intervention |                                 |                    |                   | Outcome measures       |                           |                             |                      |                 |                  |               |           | Measured<br>time point<br>(week) |      |
|----------------------------------------------------|-------------------------|----------------------------------------|---------------|------------------------|-------------------------------------|----|--------|------|-----------------------------------|---------------------------|-------------------|-----------------|---------------------------------|--------------------|-------------------|------------------------|---------------------------|-----------------------------|----------------------|-----------------|------------------|---------------|-----------|----------------------------------|------|
|                                                    |                         |                                        |               |                        |                                     |    | Female | Male | Frequency<br>(intake<br>day/week) | Intake<br>amount<br>(g/d) | Compliance<br>(%) | % 1-RM          | Frequency<br>(session/<br>week) | Duration<br>(week) | Compliance<br>(%) | Muscle mass/volume     |                           |                             | Strength             |                 | Mobility         |               |           |                                  |      |
|                                                    |                         |                                        |               |                        |                                     |    |        |      |                                   |                           |                   |                 |                                 |                    |                   | Wole body<br>lean mass | Appendicular<br>lean mass | CSA/<br>Muscle<br>thickness | Handgrip<br>strength | Leg<br>strength | Walking<br>speed | Chair<br>rise | TUG       |                                  | SPPB |
| Gade 2019 [26]                                     | Denmark<br>(Europe)     | Hospitalized<br>older adults           | MP+RT         | 85.3                   | 25.1                                | 73 | 51     | 22   | 7                                 | 27.5                      | 62-87             | NR (8-12 RM)    | 7                               | 12                 | 51                | V                      | V                         |                             | V                    | V               |                  |               | 0, 1, 12  |                                  |      |
|                                                    |                         |                                        | PLA+RT        | 84.2                   | 25.8                                | 75 | 49     | 26   |                                   |                           | 55-88             |                 |                                 |                    |                   |                        |                           |                             |                      |                 |                  |               |           |                                  |      |
| Granic 2020 [27]                                   | UK<br>(Europe)          | Sarcopenic<br>older adults             | Whole-MP+RT   | 72                     | 24.9                                | 10 | 4      | 6    | 2                                 | 17                        | 97.1              | >70             | 2                               | 6                  | 97.2              | V                      | V                         |                             | V                    | V               | V                |               | 0, 6      |                                  |      |
|                                                    |                         |                                        | Skimmed-MP+RT | 72.2                   | 25.5                                | 10 | 4      | 6    |                                   |                           | 98.3              |                 |                                 |                    |                   |                        |                           |                             |                      |                 |                  |               |           |                                  |      |
|                                                    |                         |                                        | PLA+RT        | 70.8                   | 27                                  | 10 | 4      | 6    |                                   |                           | 95                |                 |                                 |                    |                   |                        |                           |                             |                      |                 |                  |               |           |                                  |      |
| Griffen 2022 [28]                                  | UK<br>(Europe)          | Community-<br>dwelling older<br>adults | WP+RT         | 68                     | 26.6                                | 9  | 0      | 9    | 7                                 | 50                        | 96.1              | 80              | 2                               | 12                 | 98.2              | V                      | V                         |                             |                      | V               | V                |               | 0, 12     |                                  |      |
|                                                    |                         |                                        | PLA+RT        | 67                     | 25.1                                | 9  | 0      | 9    |                                   |                           | 96.1              |                 |                                 |                    |                   |                        |                           |                             |                      |                 |                  |               |           |                                  |      |
|                                                    |                         |                                        | WP            | 66                     | 25                                  | 9  | 0      | 9    |                                   |                           | 96.8              |                 |                                 |                    |                   |                        |                           |                             |                      |                 |                  |               |           |                                  |      |
|                                                    |                         |                                        | PLA           | 67                     | 25.1                                | 9  | 0      | 9    |                                   |                           | 94.1              |                 |                                 |                    |                   |                        |                           |                             |                      |                 |                  |               |           |                                  |      |
| Gronstedt<br>2020 [29]                             | Sweden<br>(Europe)      | Institutionalized<br>elderly           | MP+RT         | 85.8                   | 25.3                                | 52 | 34     | 18   | 7                                 | 36                        | 64                | NR              | 7                               | 12                 | 44                | V                      |                           |                             |                      | V               | V                |               | 0, 12     |                                  |      |
|                                                    |                         |                                        | RT            | 85.9                   | 25.3                                | 50 | 29     | 21   |                                   |                           |                   |                 |                                 |                    | 44                |                        |                           |                             |                      |                 |                  |               |           |                                  |      |
| Hamarsland<br>2019 [30]                            | Norway<br>(Europe)      | Untrained<br>older adults              | MP+RT         | 74.3                   | NR                                  | 15 | 6      | 9    | 7                                 | 40                        | 99                | NR (6-12 RM)    | 3                               | 11                 | 98.5              | V                      | V                         | V                           |                      | V               |                  |               | 0, 11     |                                  |      |
|                                                    |                         |                                        | WP+RT         | 72.9                   | NR                                  | 15 | 6      | 9    |                                   |                           | 99                |                 |                                 |                    | 100               |                        |                           |                             |                      |                 |                  |               |           |                                  |      |
| Haß 2022 [31]                                      | Germany<br>(Europe)     | Community-<br>dwelling older<br>adults | WP+Omega-3+RT | 70.4                   | 27.8                                | 21 | 11     | 10   | 7                                 | 27                        | 96                | NR              | 3                               | 8                  | NR                | V                      |                           |                             | V                    | V               | V                | V             |           | 0, 8                             |      |
|                                                    |                         |                                        | WP+RT         | 71.5                   | 28.2                                | 20 | 11     | 9    |                                   |                           | 98                |                 |                                 |                    |                   |                        |                           |                             |                      |                 |                  |               |           |                                  |      |
|                                                    |                         |                                        | RT            | 69.9                   | 26.9                                | 20 | 10     | 10   |                                   |                           |                   |                 |                                 |                    |                   |                        |                           |                             |                      |                 |                  |               |           |                                  |      |
| Haub 2002 [32];<br>Haub 2005 [33]                  | USA<br>(America)        | Community-dwelling<br>older adults     | Meat+RT       | 63                     | 28.1                                | 10 | 0      | 10   | 7                                 | 50                        | NR                | 80              | 2                               | 12                 | 94-100            | V                      |                           | V                           |                      | V               |                  |               | 0, 12     |                                  |      |
|                                                    |                         |                                        | SP+RT         | 67                     | 28.3                                | 11 | 0      | 11   |                                   | (0.33 g/kg/d)             |                   |                 |                                 |                    |                   |                        |                           |                             |                      |                 |                  |               |           |                                  |      |
| He 2022 [34]                                       | China<br>(Asia)         | Sarcopenic older<br>adults             | WP+RT         | 82.4                   | 19.4                                | 75 | 0      | 75   | 7                                 | 25                        | NR                | NR              | 7                               | 4                  | NR                |                        |                           |                             | V                    |                 |                  |               | 0, 4      |                                  |      |
|                                                    |                         |                                        | RC            | 82.4                   | 19.4                                | 75 | 0      | 75   |                                   |                           |                   |                 |                                 |                    |                   |                        |                           |                             |                      |                 |                  |               |           |                                  |      |
| Holm 2008 [35]                                     | Denmark<br>(Europe)     | Postmenopausal<br>women                | WP+RT         | 55                     | 24                                  | 13 | 13     | 0    | 2-3                               | 10                        | NR                | NR (8 RM)       | 2-3                             | 24                 | 81-91.7           | V                      |                           | V                           |                      | V               |                  |               | 0, 12, 24 |                                  |      |
|                                                    |                         |                                        | PLA+RT        | 55                     | 27                                  | 16 | 16     | 0    |                                   |                           |                   |                 |                                 |                    | 81-91.7           |                        |                           |                             |                      |                 |                  |               |           |                                  |      |
| Holwerda<br>2018 [36]                              | Netherlands<br>(Europe) | Community-dwelling<br>older adults     | WP+RT         | 69                     | 25.5                                | 21 | 0      | 21   | 7                                 | 21                        | 99.6              | 80              | 3                               | 12                 | 95                | V                      | V                         |                             |                      | V               | V                | V             |           | 0, 12                            |      |
|                                                    |                         |                                        | PLA+RT        | 71                     | 25.1                                | 20 | 0      | 20   |                                   |                           |                   |                 |                                 |                    |                   |                        |                           |                             |                      |                 |                  |               |           |                                  |      |
| Kang 2020 [37]                                     | Korea<br>(Asia)         | Untrained older<br>adults              | MP+RT         | 61.2                   | 23.7                                | 60 | 41     | 19   | 7                                 | 40                        | >80               | light           | 7                               | 12                 | NR                | V                      | V                         | V                           | V                    | V               |                  | V             |           | 0, 12                            |      |
|                                                    |                         |                                        | PLA+RT        | 58.4                   | 23.6                                | 60 | 46     | 14   |                                   |                           | >80               |                 |                                 |                    |                   |                        |                           |                             |                      |                 |                  |               |           |                                  |      |
| Karelis 2015 [38]                                  | Canada<br>(America)     | Sedentary non-frail<br>elderly         | WP+RT         | 69.9                   | 24.9                                | 34 | 26     | 8    | 7                                 | 20                        | 97                | 80              | 3                               | 19                 | 90                | V                      | V                         |                             |                      | V               |                  |               | 0, 19     |                                  |      |
|                                                    |                         |                                        | Casein+RT     | 71                     | 25.4                                | 33 | 26     | 7    |                                   |                           | 96                |                 |                                 |                    | 91                |                        |                           |                             |                      |                 |                  |               |           |                                  |      |
| Kemmler<br>2020a [39];<br>2020b [40]               | Germany<br>(Europe)     | Elderly with<br>osteosarcopenia        | WP+RT         | 77.8                   | 25                                  | 21 | 0      | 21   | 7                                 | 80                        | NR (high)         | 80              | 2-3                             | 52                 | 95                | V                      |                           |                             | V                    | V               | V                |               | 0, 52     |                                  |      |
|                                                    |                         |                                        | WP            | 79.2                   | 24.5                                | 22 | 0      | 22   |                                   | (0.33 g/kg/d)             |                   |                 |                                 |                    |                   |                        |                           |                             |                      |                 |                  |               |           |                                  |      |

To be continued.

Table S2. Continued.

| Study (year)<br>(reference<br>number) <sup>a</sup> | Country<br>(area)       | Population                                     | Study arm                    | Mean<br>age<br>(years)       | Mean<br>BMI<br>(kg/m <sup>2</sup> ) | N                    | Sex                  |                      | PS intervention                   |                           |                   | RT intervention          |                                 |                    |                   | Outcome measures       |                           |                             |                      |                 |                  |               |     | Measured<br>time point<br>(week) |      |
|----------------------------------------------------|-------------------------|------------------------------------------------|------------------------------|------------------------------|-------------------------------------|----------------------|----------------------|----------------------|-----------------------------------|---------------------------|-------------------|--------------------------|---------------------------------|--------------------|-------------------|------------------------|---------------------------|-----------------------------|----------------------|-----------------|------------------|---------------|-----|----------------------------------|------|
|                                                    |                         |                                                |                              |                              |                                     |                      | Female               | Male                 | Frequency<br>(intake<br>day/week) | Intake<br>amount<br>(g/d) | Compliance<br>(%) | % 1-RM                   | Frequency<br>(session/<br>week) | Duration<br>(week) | Compliance<br>(%) | Muscle mass/volume     |                           |                             | Strength             |                 | Mobility         |               |     |                                  |      |
|                                                    |                         |                                                |                              |                              |                                     |                      |                      |                      |                                   |                           |                   |                          |                                 |                    |                   | Wole body<br>lean mass | Appendicular<br>lean mass | CSA/<br>Muscle<br>thickness | Handgrip<br>strength | Leg<br>strength | Walking<br>speed | Chair<br>rise | TUG |                                  | SPPB |
| Krause 2019 [41]                                   | Ireland<br>(Europe)     | Sedentary,<br>medically-stable<br>older adults | WP+RT<br>PLA+RT<br>WP<br>PLA | 63.9<br>63.9<br>62.3<br>63.8 | 25.4<br>25<br>27.2<br>26.3          | 11<br>10<br>7<br>10  | 7<br>5<br>3<br>5     | 4<br>5<br>4<br>5     | 7                                 | 24<br>(0.33 g/kg/d)       | NR                | NR (8-15 RM)             | 3                               | 12                 | NR                | V                      |                           |                             | V                    |                 | V                | V             |     | 0, 12                            |      |
| Kukuljan<br>2009a [42];<br>2009b [43]              | Australia<br>(Oceania)  | Untrained middle-<br>aged and older<br>adults  | MP+RT<br>RT<br>MP<br>RC      | 61.7<br>60.7<br>61.7<br>59.9 | 27.4<br>28.1<br>27.7<br>26.7        | 45<br>46<br>45<br>44 | 0<br>0<br>0<br>0     | 45<br>46<br>45<br>44 | 7                                 | 13                        | 92                | 80-85                    | 3                               | 52                 | 69<br>65          | V                      |                           | V                           |                      | V               |                  |               |     | 0, 52                            |      |
| Kwon 2015 [44]                                     | Janan<br>(Asia)         | Pre-frail<br>older adults                      | Meat+RT<br>RT<br>RC          | 76.5<br>77.0<br>76.9         | NR<br>NR<br>NR                      | 26<br>25<br>28       | 0<br>0<br>0          | 26<br>25<br>28       | 7                                 | 20-22                     | NR                | NR                       | 1                               | 12                 | NR                |                        |                           |                             | V                    |                 | V                |               |     | 0, 12                            |      |
| Lamb 2020 [45]                                     | USA<br>(America)        | Untrained<br>older adults                      | Peanut+RT<br>RT              | 60.0<br>58.0                 | 27.8<br>29.7                        | 20<br>19             | 8<br>9               | 12<br>10             | 7                                 | 35                        | NR                | RPE 7-9/10<br>(10-12 RM) | 2                               | 10                 | NR                | V                      |                           | V                           |                      | V               |                  |               |     | 0, 6                             |      |
| Leenders 2013 [46]                                 | Netherlands<br>(Europe) | Untrained elderly                              | MP+RT<br>PLA+RT              | 71.5<br>69.5                 | 25.8<br>25.9                        | 27<br>26             | 12<br>12             | 15<br>14             | 7                                 | 15                        | NR                | 75-80                    | 3                               | 24                 | 90                | V                      | V                         | V                           | V                    | V               |                  | V             |     | 0, 12, 24                        |      |
| Liao 2021 [47]                                     | Taiwan<br>(Asia)        | Older adults with<br>knee osteoarthritis       | WP+RT<br>RT                  | 68.6<br>69.8                 | 28.1<br>27.4                        | 36<br>36             | 36<br>36             | 0<br>0               | 2                                 | 14                        | 100               | RPE 13-15/20             | 2                               | 12                 | 84.3<br>82.6      | V                      |                           |                             | V                    |                 | V                |               |     | 0, 12                            |      |
| Maesta 2007 [48]                                   | Brazil<br>(America)     | Postmenopausal<br>women                        | SP+RT<br>PLA+RT<br>SP<br>PLA | 57.6<br>60.7<br>61.3<br>57.9 | 27.8<br>27.7<br>27.2<br>26.6        | 14<br>11<br>10<br>11 | 14<br>11<br>10<br>11 | 0<br>0<br>0<br>0     | NR                                | 25<br>12.2                | NR                | 60-80                    | 3                               | 16                 | NR                | V                      |                           |                             |                      |                 |                  |               |     | 0, 16                            |      |
| Maltais 2016 [49]                                  | Canada<br>(America)     | Sarcopenic<br>elderly men                      | MP+RT<br>SP+RT<br>PLA+RT     | 68<br>64<br>64               | 25.8<br>27<br>25.9                  | 10<br>10<br>10       | 0<br>0<br>0          | 10<br>10<br>10       | 3                                 | 13.5<br>12                | >90<br>>90<br>>90 | 80                       | 3                               | 16                 | >90<br>>90<br>>90 | V                      | V                         |                             |                      | V               | V                | V             | V   | 0, 16                            |      |
| McKenna 2021 [50]                                  | USA<br>(America)        | Untrained middle-<br>aged and older<br>adults  | Meat+RT<br>RT                | 49<br>50                     | 27.6<br>27.5                        | 28<br>22             | 14<br>13             | 14<br>9              | 7                                 | 60                        | 97<br>92          | 75                       | 3                               | 10                 | 89<br>87          | V                      | V                         |                             | V                    | V               | V                |               |     | 0, 10                            |      |
| Mertz 2021 [51]                                    | Denmark<br>(Europe)     | Community-<br>dwelling older<br>adults         | WP+RT<br>WP<br>PLA           | 70.4<br>70.3<br>69.6         | 25.8<br>25.2<br>26                  | 72<br>50<br>36       | 36<br>22<br>18       | 36<br>28<br>18       | 7                                 | 40                        | 88<br>88<br>95    | NR (6 RM)                | 3                               | 52                 | 72-89             | V                      |                           | V                           |                      | V               | V                |               |     | 0, 52                            |      |
| Miller 2021 [52]                                   | Australia<br>(Oceania)  | Overweight or<br>obese older<br>adults with DM | WP+RT<br>RT                  | 61.1<br>62                   | 29.6<br>31.1                        | 98<br>100            | 36<br>36             | 62<br>64             | 7                                 | 40                        | 78.6              | RPE 12-15/20             | 3                               | 24                 | 67.5<br>57.9      | V                      | V                         | V                           |                      |                 |                  | V             | V   | 0, 24                            |      |

To be continued.

Table S2. Continued.

| Study (year)<br>(reference<br>number) <sup>a</sup> | Country<br>(area)           | Population                                  | Study arm                | Mean<br>age<br>(years)       | Mean<br>BMI<br>(kg/m <sup>2</sup> ) | N                    | Sex                         |                             | PS intervention                   |                           |                   | RT intervention       |                                 |                    |                   | Outcome measures       |                           |                             |                      |                 |                  |               |     | Measured<br>time point<br>(week) |
|----------------------------------------------------|-----------------------------|---------------------------------------------|--------------------------|------------------------------|-------------------------------------|----------------------|-----------------------------|-----------------------------|-----------------------------------|---------------------------|-------------------|-----------------------|---------------------------------|--------------------|-------------------|------------------------|---------------------------|-----------------------------|----------------------|-----------------|------------------|---------------|-----|----------------------------------|
|                                                    |                             |                                             |                          |                              |                                     |                      | Female                      | Male                        | Frequency<br>(intake<br>day/week) | Intake<br>amount<br>(g/d) | Compliance<br>(%) | % 1-RM                | Frequency<br>(session/<br>week) | Duration<br>(week) | Compliance<br>(%) | Muscle mass/volume     |                           |                             | Strength             |                 | Mobility         |               |     |                                  |
|                                                    |                             |                                             |                          |                              |                                     |                      |                             |                             |                                   |                           |                   |                       |                                 |                    |                   | Wole body<br>lean mass | Appendicular<br>lean mass | CSA/<br>Muscle<br>thickness | Handgrip<br>strength | Leg<br>strength | Walking<br>speed | Chair<br>rise | TUG |                                  |
| Mitchell 2018 [53]                                 | New<br>Zealand<br>(Oceania) | Middle-aged and<br>older adults             | MP+RT<br>PLA+RT          | 51.5<br>48.5                 | 27.5<br>28.3                        | 15<br>15             | 0<br>0                      | 15                          | 3                                 | 20                        | NR                | 80                    | 3                               | 2                  | NR                |                        |                           | V                           |                      | V               |                  |               |     | 0, 2                             |
| Molnar 2016 [54]                                   | Hungary<br>(Europe)         | Institutionalized<br>elderly                | WP+RT<br>RT              | 66.6<br>66.4                 | 22.6<br>28.1                        | 17<br>17             | 10<br>12                    | 7                           | 7                                 | 40                        | NR                | NR                    | 2                               | 12                 | NR                | V                      |                           |                             | V                    |                 |                  |               | V   | 0, 12                            |
| Mori 2018 [55]                                     | Janan<br>(Asia)             | Untrained<br>community-<br>dwelling elderly | WP+RT<br>RT<br>WP        | 70.6<br>70.6<br>70.6         | 22.1<br>22.9<br>22.3                | 25<br>25<br>25       | 25<br>25<br>25              | 0                           | 2                                 | 11                        | 90.1              | 50-70                 | 2                               | 24                 | 90.1<br>86.6      | V                      | V                         |                             | V                    | V               | V                |               |     | 0, 24                            |
| Mori 2022 [56]                                     | Janan<br>(Asia)             | Older adults with<br>sarcopenia             | WP+RT<br>RT<br>WP        | 77.7<br>77.6<br>77.8         | 20.3<br>20.3<br>20.1                | 23<br>23<br>24       | 20<br>19<br>20              | 3                           | 2                                 | 11                        | 73.2              | 50-70                 | 2                               | 24                 | 73.2<br>72.4      |                        |                           |                             | V                    | V               | V                |               |     | 0, 24, 36, 48                    |
| Nabuco 2018 [57];<br>2019a [58]                    | Brazil<br>(America)         | Pre-conditioned<br>older adults             | WP+RT<br>PLA+RT          | 66.9<br>66.5                 | 25.9<br>23.8                        | 47<br>23             | 47<br>23                    | 0                           | 3                                 | 27                        | NR                | NR (8-12 RM)          | 3                               | 12                 | NR                | V                      | V                         |                             | V                    | V               | V                | V             |     | 0, 12                            |
| Nabuco 2019b [59]                                  | Brazil<br>(America)         | Older adults with<br>sarcopenic obesity     | WP+RT<br>PLA+RT          | 68<br>70.1                   | 26.4<br>27.4                        | 13<br>13             | 13<br>13                    | 0                           | 3                                 | 35                        | NR                | NR (12 RM)            | 3                               | 12                 | NR                | V                      | V                         |                             |                      |                 |                  |               |     | 0, 12                            |
| Nabuco 2019c [60]                                  | Brazil<br>(America)         | Community-dwelling<br>older adults          | WP+RT<br>PLA+RT          | 69.2<br>68.4                 | 27.4<br>26.6                        | 15<br>15             | 15<br>15                    | 0                           | 3                                 | 35                        | NR                | 60-70 (12 RM)         | 3                               | 12                 | NR                | V                      |                           |                             | V                    |                 |                  |               |     | 0, 12                            |
| Nilsson 2020 [61]                                  | Canada<br>(America)         | Sedentary elderly                           | MP+RT<br>PLA+RT          | 77.4<br>74.4                 | 29.3<br>27.4                        | 16<br>16             | 0<br>0                      | 16                          | 7                                 | 24                        | 89.3<br>95.4      | NR (10-15 RM)         | 3                               | 12                 | 84.1<br>89.1      | V                      | V                         |                             | V                    | V               | V                | V             | V   | 0, 12                            |
| Oesen 2015 [62]                                    | Australia<br>(Oceania)      | Institutionalized<br>elder                  | WP+RT<br>RT<br>RC        | 81.8<br>83<br>83.4           | 29.8<br>28.9<br>28.9                | 36<br>41<br>40       | 31<br>37<br>35              | 5                           | 7                                 | 40                        | NR                | RPE <7/10             | 2                               | 24                 | 71<br>71          |                        |                           |                             | V                    | V               | V                | V             |     | 0, 12, 24                        |
| Orsatti 2018 [63]                                  | Brazil<br>(America)         | Postmenopausal<br>women                     | SP+RT<br>PLA+RT          | 56.8<br>58.8                 | 27.5<br>27.3                        | 16<br>16             | 16<br>16                    | 0                           | 7                                 | 25                        | NR                | 60-80 (8-12 RM)       | 3                               | 16                 | 100<br>100        | V                      |                           |                             |                      | V               |                  |               |     | 0, 16                            |
| Roschel 2021 [64]                                  | Brazil<br>(America)         | Frail elderly                               | WP+RT<br>SP+RT<br>PLA+RT | 72<br>72<br>73               | 26.7<br>28.6<br>28.8                | 22<br>22<br>22       | 22<br>22<br>22              | 0                           | 7                                 | 30                        | NR                | 70                    | 2                               | 16                 | NR                | V                      | V                         | V                           | V                    | V               |                  | V             | V   | 0, 16                            |
| Seino 2018 [65]                                    | Janan<br>(Asia)             | Sedentary older<br>adults                   | MP+RT<br>RT              | 73.4<br>73.7                 | 22.9<br>22.9                        | 40<br>40             | 34<br>33                    | 6                           | 7                                 | 10.5                      | >90               | RPE 5-7/10<br>(20 RM) | 2                               | 12                 | 95.3<br>94.6      | V                      | V                         |                             | V                    | V               | V                | V             | V   | 0, 12                            |
| Shahar 2013 [66]                                   | Malaysia<br>(Asia)          | Elderly with<br>sarcopenia                  | SP+RT<br>RT<br>SP<br>RC  | 65.2<br>69.7<br>65.9<br>67.3 | 26.5<br>23.7<br>24.3<br>26.4        | 15<br>19<br>15<br>16 | 18 <sup>b</sup><br><br><br> | 47 <sup>b</sup><br><br><br> | 7                                 | 20 (men);<br>40 (women)   | 86.7              | NR                    | 2                               | 12                 | 86.7              | V                      | V                         |                             |                      |                 |                  |               |     | 0, 6, 12                         |

To be continued.

Table S2. Continued.

| Study (year)<br>(reference<br>number) <sup>a</sup> | Country<br>(area)       | Population                                                             | Study arm | Mean<br>age<br>(years) | Mean<br>BMI<br>(kg/m <sup>2</sup> ) | N   | Sex    |      | PS intervention                   |                           |                   | RT intervention         |                                 |                    |                   | Outcome measures       |                           |                             |                      |                 |                  |               |       | Measured<br>time point<br>(week) |       |  |  |  |  |  |  |  |  |  |  |  |  |
|----------------------------------------------------|-------------------------|------------------------------------------------------------------------|-----------|------------------------|-------------------------------------|-----|--------|------|-----------------------------------|---------------------------|-------------------|-------------------------|---------------------------------|--------------------|-------------------|------------------------|---------------------------|-----------------------------|----------------------|-----------------|------------------|---------------|-------|----------------------------------|-------|--|--|--|--|--|--|--|--|--|--|--|--|
|                                                    |                         |                                                                        |           |                        |                                     |     | Female | Male | Frequency<br>(intake<br>day/week) | Intake<br>amount<br>(g/d) | Compliance<br>(%) | % 1-RM                  | Frequency<br>(session/<br>week) | Duration<br>(week) | Compliance<br>(%) | Muscle mass/volume     |                           |                             | Strength             |                 | Mobility         |               |       |                                  |       |  |  |  |  |  |  |  |  |  |  |  |  |
|                                                    |                         |                                                                        |           |                        |                                     |     |        |      |                                   |                           |                   |                         |                                 |                    |                   | Wole body<br>lean mass | Appendicular<br>lean mass | CSA/<br>Muscle<br>thickness | Handgrip<br>strength | Leg<br>strength | Walking<br>speed | Chair<br>rise | TUG   |                                  | SPPB  |  |  |  |  |  |  |  |  |  |  |  |  |
| Shenoy 2013 [67]                                   | India<br>(Asia)         | Postmenopausal<br>women                                                | SP+RT     | 54.1                   | 28.9                                | 20  | 20     | 0    | 7                                 | 40                        | NR                | 80                      | 4                               | 12                 | NR                |                        |                           |                             |                      | V               |                  |               |       | 0, 12                            |       |  |  |  |  |  |  |  |  |  |  |  |  |
|                                                    |                         |                                                                        | SP        | 54.6                   | 31                                  | 20  | 20     | 0    |                                   |                           |                   |                         |                                 |                    |                   |                        |                           |                             |                      |                 |                  |               |       |                                  |       |  |  |  |  |  |  |  |  |  |  |  |  |
|                                                    |                         |                                                                        | RC        | 54.1                   | 30                                  | 20  | 20     | 0    |                                   |                           |                   |                         |                                 |                    |                   |                        |                           |                             |                      |                 |                  |               |       |                                  |       |  |  |  |  |  |  |  |  |  |  |  |  |
| Soares 2023 [68]                                   | Brazil<br>(America)     | Older adults with<br>type 2 DM                                         | WP+RT     | 68.1                   | 29.3                                | 14  | 0      | 14   | 2                                 | 20                        | NR                | 70 (RPE 7-8/10)         | 2                               | 12                 | NR                | V                      |                           |                             | V                    | V               |                  |               | 0, 12 |                                  |       |  |  |  |  |  |  |  |  |  |  |  |  |
|                                                    |                         |                                                                        | PLA+RT    | 68.9                   | 26.8                                | 14  | 0      | 14   |                                   |                           |                   |                         |                                 |                    |                   |                        |                           |                             |                      |                 |                  |               |       |                                  |       |  |  |  |  |  |  |  |  |  |  |  |  |
| Sugihara Junior<br>2018 [69]                       | Brazil<br>(America)     | Pre-conditioned<br>older adults                                        | WP+RT     | 67.4                   | 25.6                                | 15  | 15     | 0    | 3                                 | 35                        | NR                | NR (8-12 RM)            | 3                               | 12                 | >85               | V                      | V                         |                             |                      | V               |                  |               | 0, 12 |                                  |       |  |  |  |  |  |  |  |  |  |  |  |  |
|                                                    |                         |                                                                        | PLA+RT    | 67.8                   | 25.4                                | 16  | 16     | 0    |                                   |                           |                   |                         |                                 |                    |                   |                        |                           |                             |                      |                 |                  |               |       |                                  |       |  |  |  |  |  |  |  |  |  |  |  |  |
| Tang 2020 [70]                                     | China<br>(Asia)         | Older adults<br>with sarcopenia                                        | WP+RT     | 76.6                   | 19.3                                | 100 | 0      | 100  | 7                                 | 25                        | NR                | NR (20-30 RM)           | 6                               | 24                 | NR                |                        |                           |                             | V                    |                 |                  | V             | 0, 24 |                                  |       |  |  |  |  |  |  |  |  |  |  |  |  |
|                                                    |                         |                                                                        | RC        | 77                     | 19.5                                | 100 | 0      | 100  |                                   |                           |                   |                         |                                 |                    |                   |                        |                           |                             |                      |                 |                  |               |       |                                  |       |  |  |  |  |  |  |  |  |  |  |  |  |
| Thomson 2016 [71]                                  | Australia<br>(Oceania)  | Overweight<br>older adults                                             | MP+RT     | 61.3                   | 27.7                                | 54  | 29     | 25   | 7                                 | 27                        | 97                | NR (8-12 RM)            | 3                               | 12                 | 91.4              | V                      |                           |                             | V                    | V               | V                |               | 0, 12 |                                  |       |  |  |  |  |  |  |  |  |  |  |  |  |
|                                                    |                         |                                                                        | SP+RT     | 61.7                   | 27.5                                | 64  | 35     | 29   |                                   |                           | 98.1              |                         |                                 |                    |                   |                        |                           |                             |                      |                 |                  |               |       |                                  |       |  |  |  |  |  |  |  |  |  |  |  |  |
|                                                    |                         |                                                                        | PLA+RT    | 61.5                   | 27.6                                | 61  | 34     | 27   |                                   |                           | 98.4              |                         |                                 |                    |                   |                        |                           |                             |                      |                 |                  |               |       |                                  |       |  |  |  |  |  |  |  |  |  |  |  |  |
| Tieland 2012 [72];<br>Dirks 2017 [73]              | Netherlands<br>(Europe) | Frail elderly people                                                   | MP+RT     | 78                     | 28.7                                | 31  | 20     | 11   | 7                                 | 30                        | ≥98%              | 70                      | 2                               | 24                 | ≥98%              | V                      | V                         | V                           | V                    | V               | V                | V             | V     | 0, 12, 24                        |       |  |  |  |  |  |  |  |  |  |  |  |  |
|                                                    |                         |                                                                        | PLA+RT    | 79                     | 28.2                                | 31  | 21     | 10   |                                   |                           |                   |                         |                                 |                    |                   |                        |                           |                             |                      |                 |                  |               |       |                                  |       |  |  |  |  |  |  |  |  |  |  |  |  |
| Trevisan 2010 [74]                                 | Brazil<br>(America)     | Postmenopausal<br>women, untrained<br>(low muscle mass,<br>overweight) | SP+RT     | 58                     | 28                                  | 15  | 15     | 0    | 7                                 | 25                        | NR                | 60-80                   | 3                               | 12                 | NR                | V                      |                           |                             |                      |                 |                  |               | 0, 12 |                                  |       |  |  |  |  |  |  |  |  |  |  |  |  |
|                                                    |                         |                                                                        | PLA+RT    | 57                     | 28                                  | 15  | 15     | 0    |                                   |                           |                   |                         |                                 |                    |                   |                        |                           |                             |                      |                 |                  |               |       |                                  |       |  |  |  |  |  |  |  |  |  |  |  |  |
|                                                    |                         |                                                                        | SP        | 60                     | 29                                  | 15  | 15     | 0    |                                   |                           |                   |                         |                                 |                    |                   |                        |                           |                             |                      |                 |                  |               |       |                                  |       |  |  |  |  |  |  |  |  |  |  |  |  |
|                                                    |                         |                                                                        | PLA       | 60                     | 27                                  | 15  | 15     | 0    |                                   |                           |                   |                         |                                 |                    |                   |                        |                           |                             |                      |                 |                  |               |       |                                  |       |  |  |  |  |  |  |  |  |  |  |  |  |
| Unterberger<br>2022 [75]                           | Australia<br>(Oceania)  | Untrained<br>older adults                                              | SP+RT     | 73.2                   | 26.2                                | 48  | 28     | 20   | 2                                 | 32                        | NR                | RPE 6-7/10<br>(8-12 RM) | 2                               | 10                 | NR                | V                      | V                         |                             | V                    | V               | V                | V             | V     | 0, 10                            |       |  |  |  |  |  |  |  |  |  |  |  |  |
|                                                    |                         |                                                                        | PLA+RT    | 72.4                   | 26.3                                | 41  | 21     | 20   |                                   |                           |                   |                         |                                 |                    |                   |                        |                           |                             |                      |                 |                  |               |       |                                  |       |  |  |  |  |  |  |  |  |  |  |  |  |
|                                                    |                         |                                                                        | RC        | 73                     | 26                                  | 47  | 24     | 23   |                                   |                           |                   |                         |                                 |                    |                   |                        |                           |                             |                      |                 |                  |               |       |                                  |       |  |  |  |  |  |  |  |  |  |  |  |  |
| Verdijk 2009 [76]                                  | Netherlands<br>(Europe) | Free-living<br>elderly people                                          | Casein+RT | 72                     | 26.5                                | 13  | 0      | 13   | 3                                 | 20                        | NR                | 75-80                   | 3                               | 12                 | NR                | V                      |                           | V                           |                      |                 |                  |               | 0, 12 |                                  |       |  |  |  |  |  |  |  |  |  |  |  |  |
|                                                    |                         |                                                                        | PLA+RT    | 72                     | 27.4                                | 13  | 0      | 13   |                                   |                           |                   |                         |                                 |                    |                   |                        |                           |                             |                      |                 |                  |               |       |                                  |       |  |  |  |  |  |  |  |  |  |  |  |  |
| Verreijen 2015 [77]                                | Netherlands<br>(Europe) | Obese older<br>adults                                                  | WP+RT     | 63.7                   | 32.7                                | 30  | 16     | 14   | 7                                 | 40                        | 91                | NR (12 RM)              | 3                               | 13                 | 72                | V                      | V                         |                             | V                    |                 | V                | V             | 0, 13 |                                  |       |  |  |  |  |  |  |  |  |  |  |  |  |
|                                                    |                         |                                                                        | PLA+RT    | 63                     | 33.3                                | 30  | 16     | 14   |                                   |                           | 97                |                         |                                 |                    |                   |                        |                           |                             |                      |                 |                  |               |       |                                  |       |  |  |  |  |  |  |  |  |  |  |  |  |
| Vijayakumaran<br>2023 [78]                         | Malaysia<br>(Asia)      | Sarcopenic<br>older adults                                             | WP+RT     | 66.6                   | 26.4                                | 8   | 8      | 0    | 7                                 | 15                        | 90                | 75-80                   | 3                               | 12                 | 90                |                        | V                         | V                           | V                    |                 | V                |               | V     | 0, 12                            |       |  |  |  |  |  |  |  |  |  |  |  |  |
|                                                    |                         |                                                                        | RT        | 65.5                   | 24.5                                | 8   | 8      | 0    |                                   |                           |                   |                         |                                 |                    |                   |                        |                           |                             |                      |                 |                  |               |       |                                  |       |  |  |  |  |  |  |  |  |  |  |  |  |
| Vikberg 2019 [79]                                  | Sweden<br>(Europe)      | Old individuals with<br>pre-sarcopenia                                 | MP+RT     | 70.9                   | 22.7                                | 36  | 20     | 16   | 7                                 | 20-30                     | 84                | RPE 6-7/10<br>(8-10 RM) | 7                               | 10                 | 91                | V                      | V                         |                             | V                    |                 | V                | V             | V     | V                                | 0, 10 |  |  |  |  |  |  |  |  |  |  |  |  |
|                                                    |                         |                                                                        | RC        | 70                     | 23.3                                | 34  | 18     | 16   |                                   |                           |                   |                         |                                 |                    |                   |                        |                           |                             |                      |                 |                  |               |       |                                  |       |  |  |  |  |  |  |  |  |  |  |  |  |
| Villanueva<br>2014 [80]                            | USA<br>(America)        | Untrained<br>older adults                                              | WP+RT     | 68.7                   | 25.3                                | 7   | 0      | 7    | 7                                 | 35                        | 100               | 70                      | 3                               | 12                 | 94                | V                      |                           |                             |                      | V               | V                |               |       | 0, 6, 12                         |       |  |  |  |  |  |  |  |  |  |  |  |  |
|                                                    |                         |                                                                        | RT        | 68.7                   | 27.1                                | 7   | 0      | 7    |                                   |                           |                   |                         |                                 |                    |                   |                        |                           |                             |                      |                 |                  |               |       |                                  |       |  |  |  |  |  |  |  |  |  |  |  |  |
|                                                    |                         |                                                                        | RC        | 67.1                   | 26.8                                | 8   | 0      | 8    |                                   |                           |                   |                         |                                 |                    |                   |                        |                           |                             |                      |                 |                  |               |       |                                  |       |  |  |  |  |  |  |  |  |  |  |  |  |

To be continued.



Table S2. Continued.

| Study (year)<br>(reference<br>number) <sup>a</sup> | Country<br>(area)   | Population                                      | Study arm       | Mean<br>age<br>(years) | Mean<br>BMI<br>(kg/m <sup>2</sup> ) | N        | Sex      |        | PS intervention                   |                           |                   | RT intervention |                                 |                    |                   | Outcome measures       |                           |                             |                      |                 |                  |               |             | Measured<br>time point<br>(week) |
|----------------------------------------------------|---------------------|-------------------------------------------------|-----------------|------------------------|-------------------------------------|----------|----------|--------|-----------------------------------|---------------------------|-------------------|-----------------|---------------------------------|--------------------|-------------------|------------------------|---------------------------|-----------------------------|----------------------|-----------------|------------------|---------------|-------------|----------------------------------|
|                                                    |                     |                                                 |                 |                        |                                     |          | Female   | Male   | Frequency<br>(intake<br>day/week) | Intake<br>amount<br>(g/d) | Compliance<br>(%) | % 1-RM          | Frequency<br>(session/<br>week) | Duration<br>(week) | Compliance<br>(%) | Muscle mass/volume     |                           |                             | Strength             |                 | Mobility         |               |             |                                  |
|                                                    |                     |                                                 |                 |                        |                                     |          |          |        |                                   |                           |                   |                 |                                 |                    |                   | Wole body<br>lean mass | Appendicular<br>lean mass | CSA/<br>Muscle<br>thickness | Handgrip<br>strength | Leg<br>strength | Walking<br>speed | Chair<br>rise | TUG         |                                  |
| Weisgarber<br>2015 [81]                            | Canada<br>(America) | Postmenopausal<br>women                         | WP+RT<br>PLA+RT | 57 <sup>c</sup>        | 28.3 <sup>c</sup>                   | 12<br>12 | 12<br>12 | 0<br>0 | 4                                 | 40                        | 100               | 30              | 4                               | 10                 | NR                |                        | V                         | V                           |                      | V               |                  |               |             | 0, 10                            |
| Yamada 2019 [82]                                   | Janan<br>(Asia)     | Older adults with<br>sarcopenia or<br>dynapenia | WP+RT           | 84.9                   | 21.3                                | 28       | 20       | 8      | 7                                 | 10                        | 97.6              | NR (20 RM)      | 2                               | 12                 | 88                |                        | V                         |                             | V                    | V               | V                | V             |             | 0, 12                            |
|                                                    |                     |                                                 | RT              | 84.7                   | 22.6                                | 28       | 18       | 10     |                                   |                           |                   |                 | 81                              |                    |                   |                        |                           |                             |                      |                 |                  |               |             |                                  |
|                                                    |                     |                                                 | WP              | 83.2                   | 22.6                                | 28       | 20       | 8      |                                   |                           | 100               |                 |                                 |                    |                   |                        |                           |                             |                      |                 |                  |               |             |                                  |
|                                                    |                     |                                                 | RC              | 83.9                   | 21.2                                | 28       | 15       | 13     |                                   |                           |                   |                 |                                 |                    |                   |                        |                           |                             |                      |                 |                  |               |             |                                  |
| Zdzieblik<br>2021 [83]                             | Austria<br>(Europe) | Untrained overweight<br>middle-aged adults      | WP+RT           | 49.6                   | 30.2                                | 36       | 0        | 36     | 7                                 | 15                        | NR                | 85              | 3                               | 12                 | NR                | V                      | V                         |                             |                      | V               |                  |               | 0, 12       |                                  |
|                                                    |                     |                                                 | PLA+RT          | 47.4                   | 29.9                                | 31       | 0        | 31     |                                   |                           |                   |                 |                                 |                    |                   |                        |                           |                             |                      |                 |                  |               |             |                                  |
| Zhao 2022 [84]                                     | China<br>(Asia)     | Sarcopenic<br>older adults                      | WP+RT           | 61.9                   | 19.9                                | 20       | 12       | 8      | 7                                 | 24                        | NR                | NR (8 RM)       | 7                               | 12                 | NR                | V                      |                           |                             | V                    |                 | V                |               | 0, 4, 8, 12 |                                  |
|                                                    |                     |                                                 | WP              | 64.9                   | 18.6                                | 20       | 12       | 8      |                                   |                           |                   |                 |                                 |                    |                   |                        |                           |                             |                      |                 |                  |               |             |                                  |
|                                                    |                     |                                                 | RC              | 62.9                   | 19.8                                | 20       | 12       | 8      |                                   |                           |                   |                 |                                 |                    |                   |                        |                           |                             |                      |                 |                  |               |             |                                  |
| Zhu 2019 [85]                                      | China<br>(Asia)     | Sarcopenic<br>older adults                      | SP+RT           | 74.8                   | 18.8                                | 36       | 29       | 7      | 3                                 | 17.2                      | 86.3              | 40              | 3                               | 12                 | 92.8              |                        | V                         |                             | V                    | V               | V                | V             | 0, 12, 24   |                                  |
|                                                    |                     |                                                 | RT              | 74.5                   | 18.8                                | 40       | 29       | 11     |                                   |                           |                   |                 |                                 | 95.3               |                   |                        |                           |                             |                      |                 |                  |               |             |                                  |
|                                                    |                     |                                                 | RC              | 72.2                   | 18.9                                | 37       | 29       | 8      |                                   |                           |                   |                 |                                 |                    |                   |                        |                           |                             |                      |                 |                  |               |             |                                  |

<sup>a</sup>The number denotes the citation of the indicated reference at the end of table.

<sup>b</sup>Data is represented as total number of study sample.

<sup>c</sup>Data is represented as mean value of study sample.

1-RM, one-repetition maximum; BMI, body mass index; Cre, creatine; CSA, cross-section area; DM, diabetes mellitus; MP, milk protein; NR, not report; PLA, placebo; RPE, rate of perceived exertion; PS, protein supplementation; RC, regular care; RT, resistance training; SP, soy protein; SPPB, Short Physical Performance Battery; TUG, timed up and go; UK, United Kingdom; USA, United States of America; WP, whey protein.

References of supplementary Table S2

- Aas SN, Seynnes O, Benestad HB, Raastad T: Strength training and protein supplementation improve muscle mass, strength, and function in mobility-limited older adults: a randomized controlled trial. *Aging Clin Exp Res* **2019**.
- Amasene M, Besga A, Echeverria I, Urquiza M, Ruiz JR, Rodriguez-Larrad A, Aldamiz M, Anaut P, Irazusta J, Labayen I: Effects of Leucine-Enriched Whey Protein Supplementation on Physical Function in Post-Hospitalized Older Adults Participating in 12-Weeks of Resistance Training Program: A Randomized Controlled Trial. *Nutrients* **2019**, 11.
- Amasene M, Cadenas-Sanchez C, Echeverria I, Sanz B, Alonso C, Tobalina I, Irazusta J, Labayen I, Besga A: Effects of Resistance Training Intervention along with Leucine-Enriched Whey Protein Supplementation on Sarcopenia and Frailty in Post-Hospitalized Older Adults: Preliminary Findings of a Randomized Controlled Trial. *J Clin Med* **2021**, 11.
- Arciero PJ, Baur D, Connelly S, Ormsbee MJ: Timed-daily ingestion of whey protein and exercise training reduces visceral adipose tissue mass and improves insulin resistance: the PRISE study. *Journal of applied physiology (Bethesda, Md : 1985)* **2014**, 117:1-10.
- Arnarson A, Gudny Geirsdottir O, Ramel A, Briem K, Jonsson PV, Thorsdottir I: Effects of whey proteins and carbohydrates on the efficacy of resistance training in elderly people: Double blind, randomised controlled trial. *Eur J Clin Nutr* **2013**, 67:821-826.
- Bagheri R, Hooshmand Moghadam B, Candow DG, Elliott BT, Wong A, Ashtary-Larky D, Forbes SC, Rashidlamir A: Effects of Icelandic yogurt consumption and resistance training in healthy untrained older males. *Br J Nutr* **2022**, 127:1334-1342.

7. Bijeh N, Mohammadnia-Ahmadi M, Hooshamnd-Moghadam B, Eskandari M, Golestani F: Effects of Soy Milk in Conjunction With Resistance Training on Physical Performance and Skeletal Muscle Regulatory Markers in Older Men. *Biol Res Nurs* **2022**, 24:294-307.
8. Candow DG, Chilibeck PD, Facci M, Abeysekara S, Zello GA: Protein supplementation before and after resistance training in older men. *Eur J Appl Physiol* **2006**, 97:548-556.
9. Candow DG, Little JP, Chilibeck PD, Abeysekara S, Zello GA, Kazachkov M, Cornish SM, Yu PH: Low-dose creatine combined with protein during resistance training in older men. *Med Sci Sports Exerc* **2008**, 40:1645-1652.
10. Chale A, Cloutier GJ, Hau C, Phillips EM, Dallal GE, Fielding RA: Efficacy of whey protein supplementation on resistance exercise-induced changes in lean mass, muscle strength, and physical function in mobility-limited older adults. *The journals of gerontology Series A, Biological sciences and medical sciences* **2013**, 68:682-690.
11. Chang YM: Effects of resistance training combined with nutritional intervention on alleviating sarcopenia in the elderly. *Electron J Practical Clin Nurs Sci* **2019**, 4:48-50.
12. Chen S, Sheng YL, Qi T, Sheng XM, Jin XW: Effects of fortified nutrition combining with resistance exercise on physical function and activity of daily living for elderly patients with sarcopenia. *J Nurs Sci* **2017**, 32:8-10.
13. Colonetti T, Grande AJ, da Rocha FR, Ronconi Dondossola E, Tuon L, Gomes Batista Teles H, Minotto Bom B, Colonetti L, da Rosa MI: Whey protein and vitamin D supplementation in institutionalized older adults: A randomized trial. *Nutr Health* **2023**, 29:129-138.
14. Daly RM, O'Connell SL, Mundell NL, Grimes CA, Dunstan DW, Nowson CA: Protein-enriched diet, with the use of lean red meat, combined with progressive resistance training enhances lean tissue mass and muscle strength and reduces circulating IL-6 concentrations in elderly women: a cluster randomized controlled trial. *Am J Clin Nutr* **2014**, 99:899-910.
15. de Azevedo Bach S, Radaelli R, Beck Schemes M, Neske R, Garbelotto C, Roschel H, Silveira Pinto R, Dornelles Schneider C: Can supplemental protein to low-protein containing meals superimpose on resistance-training muscle adaptations in older adults? A randomized clinical trial. *Exp Gerontol* **2022**, 162:111760.
16. de Carvalho Bastone A, Nobre LN, de Souza Moreira B, Rosa IF, Ferreira GB, Santos DDL, Monteiro N, Alves MD, Gandra RA, de Lira EM: Independent and combined effect of home-based progressive resistance training and nutritional supplementation on muscle strength, muscle mass and physical function in dynapenic older adults with low protein intake: A randomized controlled trial. *Arch Gerontol Geriatr* **2020**, 89:104098.
17. Deer RR, Dickinson JM, Baillargeon J, Fisher SR, Raji M, Volpi E: A Phase I Randomized Clinical Trial of Evidence-Based, Pragmatic Interventions to Improve Functional Recovery After Hospitalization in Geriatric Patients. *J Gerontol A Biol Sci Med Sci* **2019**, 74:1628-1636.
18. Deibert P, Solleder F, König D, Vitolins MZ, Dickhuth HH, Gollhofer A, Berg A: Soy protein based supplementation supports metabolic effects of resistance training in previously untrained middle aged males. *Aging Male* **2011**, 14:273-279.
19. Duff WR, Chilibeck PD, Rooke JJ, Kaviani M, Krentz JR, Haines DM: The effect of bovine colostrum supplementation in older adults during resistance training. *Int J Sport Nutr Exerc Metab* **2014**, 24:276-285.
20. Dulac MC, Pion CH, Lemieux FC, Pinheiro Carvalho L, El Hajj Boutros G, Bélanger M, Gaudreau P, Chevalier S, Morais JA, Noirez P, et al: Effects of slow- v. fast-digested protein supplementation combined with mixed power training on muscle function and functional capacities in older men. *Br J Nutr* **2021**, 125:1017-1033.
21. Eliot KA, Knehans AW, Bemben DA, Witten MS, Carter J, Bemben MG: The effects of creatine and whey protein supplementation on body composition in men aged 48 to 72 years during resistance training. *Journal of Nutrition, Health and Aging* **2008**, 12:208-212.
22. Bemben MG, Witten MS, Carter JM, Eliot KA, Knehans AW, Bemben DA: The effects of supplementation with creatine and protein on muscle strength following a traditional resistance training program in middle-aged and older men. *J Nutr Health Aging* **2010**, 14:155-159.
23. Fiatarone MA, O'Neill EF, Ryan ND, Clements KM, Solares GR, Nelson ME, Roberts SB, Kehayias JJ, Lipsitz LA, Evans WJ: Exercise Training and Nutritional Supplementation for Physical Frailty in Very Elderly People. *New England J Med* **1994**, 330:1769-1775.
24. Formica MB, Gianoudis J, Nowson CA, O'Connell SL, Milte C, Ellis KA, Daly RM: Effect of lean red meat combined with a multicomponent exercise program on muscle and cognitive function in older adults: a 6-month randomized controlled trial. *Am J Clin Nutr* **2020**, 112:113-128.
25. Francis P, Mc Cormack W, Toomey C, Norton C, Saunders J, Kerin E, Lyons M, Jakeman P: Twelve weeks' progressive resistance training combined with protein supplementation beyond habitual intakes increases upper leg lean tissue mass, muscle strength and extended gait speed in healthy older women. *Biogerontology* **2017**, 18:881-891.
26. Gade J, Beck AM, Andersen HE, Christensen B, Rønholt F, Klausen TW, Vinther A, Astrup A: Protein supplementation combined with low-intensity resistance training in geriatric medical patients during and after hospitalisation: a randomised, double-blind, multicentre trial. *Br J Nutr* **2019**, 122:1006-1020.
27. Granic A, Hurst C, Dismore L, Stevenson E, Sayer AA, Aspray T: Feasibility and acceptability of a milk and resistance exercise intervention to improve muscle function in community-dwelling older adults (MilkMAN): Pilot study. *PLoS One* **2020**, 15:e0235952.
28. Griffen C, Duncan M, Hattersley J, Weickert MO, Dallaway A, Renshaw D: Effects of resistance exercise and whey protein supplementation on skeletal muscle strength, mass, physical function, and hormonal and inflammatory biomarkers in healthy active older men: a randomised, double-blind, placebo-controlled trial. *Exp Gerontol* **2022**, 158:111651.

29. Gronstedt H, Vikstrom S, Cederholm T, Franzen E, Luiking YC, Seiger A, Wimo A, Faxen-Irving G, Bostrom AM: Effect of Sit-to-Stand Exercises Combined With Protein-Rich Oral Supplementation in Older Persons: The Older Person's Exercise and Nutrition Study. *J Am Med Dir Assoc* **2020**, *21*:1229-1237.
30. Hamarsland H, Johansen MK, Seeberg F, Brochmann M, Garthe I, Benestad HB, Raastad T: Native Whey Induces Similar Adaptation to Strength Training as Milk, despite Higher Levels of Leucine, in Elderly Individuals. *Nutrients* **2019**, *11*.
31. Haß U, Kochlik B, Herpich C, Rudloff S, Norman K: Effects of an Omega-3 Supplemented, High-Protein Diet in Combination with Vibration and Resistance Exercise on Muscle Power and Inflammation in Old Adults: A Pilot Randomized Controlled Trial. *Nutrients* **2022**, *14*.
32. Haub MD, Wells AM, Tarnopolsky MA, Campbell WW: Effect of protein source on resistive-training-induced changes in body composition and muscle size in older men. *Am J Clin Nutr* **2002**, *76*:511-517.
33. Haub MD, Wells AM, Campbell WW: Beef and soy-based food supplements differentially affect serum lipoprotein-lipid profiles because of changes in carbohydrate intake and novel nutrient intake ratios in older men who resistive-train. *Metabolism* **2005**, *54*:769-774.
34. He LN, Li DM: Observation on the Clinical Effect of Dietary Nutrition Intervention Combined with Anti-resistance Training in Elderly Male Patients with Sarcopenia. *Smart Healthcare* **2022**, *8*:44-47.
35. Holm L, Olesen JL, Matsumoto K, Doi T, Mizuno M, Alsted TJ, Mackey AL, Schwarz P, Kjaer M: Protein-containing nutrient supplementation following strength training enhances the effect on muscle mass, strength, and bone formation in postmenopausal women. *J Appl Physiol (1985)* **2008**, *105*:274-281.
36. Holwerda AM, Overkamp M, Paulussen KJM, Smeets JSJ, van Kranenburg J, Backx EMP, Gijsen AP, Goessens JPB, Verdijk LB, van Loon LJC: Protein Supplementation after Exercise and before Sleep Does Not Further Augment Muscle Mass and Strength Gains during Resistance Exercise Training in Active Older Men. *J Nutr* **2018**, *148*:1723-1732.
37. Kang Y, Kim N, Choi YJ, Lee Y, Yun J, Park SJ, Park HS, Chung YS, Park YK: Leucine-Enriched Protein Supplementation Increases Lean Body Mass in Healthy Korean Adults Aged 50 Years and Older: A Randomized, Double-Blind, Placebo-Controlled Trial. *Nutrients* **2020**, *12*.
38. Karelis AD, Messier V, Suppere C, Briand P, Rabasa-Lhoret R: Effect of cysteine-rich whey protein (immunocal(R)) supplementation in combination with resistance training on muscle strength and lean body mass in non-frail elderly subjects: a randomized, double-blind controlled study. *J Nutr Health Aging* **2015**, *19*:531-536.
39. Kemmler W, Kohl M, Fröhlich M, Jakob F, Engelke K, von Stengel S, Schoene D: Effects of High-Intensity Resistance Training on Osteopenia and Sarcopenia Parameters in Older Men with Osteosarcopenia-One-Year Results of the Randomized Controlled Franconian Osteopenia and Sarcopenia Trial (FrOST). *J Bone Miner Res* **2020**, *35*:1634-1644.
40. Kemmler W, Kohl M, Jakob F, Engelke K, von Stengel S: Effects of High Intensity Dynamic Resistance Exercise and Whey Protein Supplements on Osteosarcopenia in Older Men with Low Bone and Muscle Mass. Final Results of the Randomized Controlled FrOST Study. *Nutrients* **2020**, *12*.
41. Krause M, Crognale D, Cogan KE, Contarelli S, Egan B, Newsholme P, De Vito G: The effects of a combined bodyweight-based and elastic bands resistance training, with or without protein supplementation, on muscle mass, signaling and heat shock response in healthy older people. *Exp Gerontol* **2019**, *115*:104-113.
42. Kukuljan S, Nowson CA, Bass SL, Sanders K, Nicholson GC, Seibel MJ, Salmon J, Daly RM: Effects of a multi-component exercise program and calcium-vitamin-D3-fortified milk on bone mineral density in older men: a randomised controlled trial. *Osteoporos Int* **2009**, *20*:1241-1251.
43. Kukuljan S, Nowson CA, Sanders K, Daly RM: Effects of resistance exercise and fortified milk on skeletal muscle mass, muscle size, and functional performance in middle-aged and older men: an 18-mo randomized controlled trial. *J Appl Physiol (1985)* **2009**, *107*:1864-1873.
44. Kwon J, Yoshida Y, Yoshida H, Kim H, Suzuki T, Lee Y: Effects of a combined physical training and nutrition intervention on physical performance and health-related quality of life in prefrail older women living in the community: a randomized controlled trial. *J Am Med Dir Assoc* **2015**, *16*:263.e261-268.
45. Lamb DA, Moore JH, Smith MA, Vann CG, Osburn SC, Ruple BA, Fox CD, Smith KS, Altonji OM, Power ZM, et al: The effects of resistance training with or without peanut protein supplementation on skeletal muscle and strength adaptations in older individuals. *J Int Soc Sports Nutr* **2020**, *17*:66.
46. Leenders M, Verdijk LB, Van der Hoeven L, Van Kranenburg J, Nilwik R, Wodzig WK, Senden JM, Keizer HA, Van Loon LJ: Protein supplementation during resistance-type exercise training in the elderly. *Med Sci Sports Exerc* **2013**, *45*:542-552.
47. Liao CD, Liao YH, Liou TH, Hsieh CY, Kuo YC, Chen HC: Effects of Protein-Rich Nutritional Composition Supplementation on Sarcopenia Indices and Physical Activity during Resistance Exercise Training in Older Women with Knee Osteoarthritis. *Nutrients* **2021**, *13*:2487.
48. Maesta N, Nahas EA, Nahas-Neto J, Orsatti FL, Fernandes CE, Traiman P, Burini RC: Effects of soy protein and resistance exercise on body composition and blood lipids in postmenopausal women. *Maturitas* **2007**, *56*:350-358.

49. Maltais ML, Ladouceur JP, Dionne IJ: The Effect of Resistance Training and Different Sources of Postexercise Protein Supplementation on Muscle Mass and Physical Capacity in Sarcopenic Elderly Men. *J Strength Cond Res* **2016**, *30*:1680-1687.
50. McKenna CF, Salvador AF, Hughes RL, Scaroni SE, Alamilla RA, Askow AT, Paluska SA, Dilger AC, Holscher HD, De Lisio M: Higher protein intake during resistance training does not potentiate strength, but modulates gut microbiota, in middle-aged adults: a randomized control trial. *Am J Physiology-Endocrinology and Metabolism* **2021**, *320*:E900-E913.
51. Mertz KH, Reitelseder S, Bechshoeft R, Bulow J, Højfeldt G, Jensen M, Schacht SR, Lind MV, Rasmussen MA, Mikkelsen UR, et al: The effect of daily protein supplementation, with or without resistance training for 1 year, on muscle size, strength, and function in healthy older adults: A randomized controlled trial. *Am J Clin Nutr* **2021**, *113*:790-800.
52. Miller EG, Nowson CA, Dunstan DW, Kerr DA, Menzies D, Daly RM: Effects of whey protein plus vitamin D supplementation combined with progressive resistance training on glycaemic control, body composition, muscle function and cardiometabolic risk factors in middle-aged and older overweight/obese adults with type 2 diabetes: A 24-week randomized controlled trial. *Diabetes Obes Metab* **2021**, *23*:938-949.
53. Mitchell CJ, D'Souza RF, Mitchell SM, Figueiredo VC, Miller BF, Hamilton KL, Peelor FF, 3rd, Coronet M, Pileggi CA, Durainayagam B, et al: Impact of dairy protein during limb immobilization and recovery on muscle size and protein synthesis; a randomized controlled trial. *J Appl Physiol (1985)* **2018**, *124*:717-728.
54. Molnar A, Jonasne Sztruhar I, Csontos AA, Ferencz C, Varbiro S, Szekacs B: Special nutrition intervention is required for muscle protective efficacy of physical exercise in elderly people at highest risk of sarcopenia. *Physiol Int* **2016**, *103*:368-376.
55. Mori H, Tokuda Y: Effect of whey protein supplementation after resistance exercise on the muscle mass and physical function of healthy older women: A randomized controlled trial. *Geriatr Gerontol Int* **2018**, *18*:1398-1404.
56. Mori H, Tokuda Y: De-Training Effects Following Leucine-Enriched Whey Protein Supplementation and Resistance Training in Older Adults with Sarcopenia: A Randomized Controlled Trial with 24 Weeks of Follow-Up. *J Nutr Health Aging* **2022**, *26*:994-1002.
57. Nabuco HCG, Tomeleri CM, Sugihara Junior P, Fernandes RR, Cavalcante EF, Antunes M, Ribeiro AS, Teixeira DC, Silva AM, Sardinha LB, Cyrino ES: Effects of Whey Protein Supplementation Pre- or Post-Resistance Training on Muscle Mass, Muscular Strength, and Functional Capacity in Pre-Conditioned Older Women: A Randomized Clinical Trial. *Nutrients* **2018**, *10*.
58. Nabuco HCG, Tomeleri CM, Sugihara Junior P, Fernandes RR, Cavalcante EF, Venturini D, Barbosa DS, Silva AM, Sardinha LB, Cyrino ES: Effects of pre- or post-exercise whey protein supplementation on body fat and metabolic and inflammatory profile in pre-conditioned older women: A randomized, double-blind, placebo-controlled trial. *Nutr Metab Cardiovasc Dis* **2019**, *29*:290-300.
59. Nabuco HCG, Tomeleri CM, Fernandes RR, Sugihara Junior P, Cavalcante EF, Cunha PM, Antunes M, Nunes JP, Venturini D, Barbosa DS, et al: Effect of whey protein supplementation combined with resistance training on body composition, muscular strength, functional capacity, and plasma-metabolism biomarkers in older women with sarcopenic obesity: A randomized, double-blind, placebo-controlled trial. *Clin Nutr ESPEN* **2019**, *32*:88-95.
60. Nabuco HCG, Tomeleri CM, Fernandes RR, Sugihara Junior P, Cavalcante EF, Venturini D, Barbosa DS, Silva AM, Sardinha LB, Cyrino ES: Effects of Protein Intake Beyond Habitual Intakes Associated With Resistance Training on Metabolic Syndrome-Related Parameters, Isokinetic Strength, and Body Composition in Older Women. *J Aging Phys Act* **2019**, *27*:545–552.
61. Nilsson MI, Mikhail A, Lan L, Di Carlo A, Hamilton B, Barnard K, Hettinga BP, Hatcher E, Tarnopolsky MG, Nederveen JP, et al: A Five-Ingredient Nutritional Supplement and Home-Based Resistance Exercise Improve Lean Mass and Strength in Free-Living Elderly. *Nutrients* **2020**, *12*.
62. Oesen S, Halper B, Hofmann M, Jandrasits W, Franzke B, Strasser EM, Graf A, Tschan H, Bachl N, Quittan M, et al: Effects of elastic band resistance training and nutritional supplementation on physical performance of institutionalised elderly - A randomized controlled trial. *Exp Gerontol* **2015**, *72*:99-108.
63. Orsatti FL, Maestá N, de Oliveira EP, Nahas Neto J, Burini RC, Nunes PRP, Souza AP, Martins FM, Nahas EP: Adding Soy Protein to Milk Enhances the Effect of Resistance Training on Muscle Strength in Postmenopausal Women. *J Diet Suppl* **2018**, *15*:140-152.
64. Roschel H, Hayashi AP, Fernandes AL, Jambassi-Filho JC, Hevia-Larraín V, de Capitani M, Santana DA, Gonçalves LS, de Sá-Pinto AL, Lima FR, et al: Supplement-based nutritional strategies to tackle frailty: A multifactorial, double-blind, randomized placebo-controlled trial. *Clin Nutr* **2021**, *40*:4849-4858.
65. Seino S, Sumi K, Narita M, Yokoyama Y, Ashida K, Kitamura A, Shinkai S: Effects of Low-Dose Dairy Protein Plus Micronutrient Supplementation during Resistance Exercise on Muscle Mass and Physical Performance in Older Adults: A Randomized, Controlled Trial. *J Nutr Health Aging* **2018**, *22*:59-67.
66. Shahar S, Kamaruddin NS, Badrasawi M, Sakian NI, Abd Manaf Z, Yassin Z, Joseph L: Effectiveness of exercise and protein supplementation intervention on body composition, functional fitness, and oxidative stress among elderly Malays with sarcopenia. *Clin Interv Aging* **2013**, *8*:1365-1375.

67. Shenoy S, Bedi R, Sandhu JS: Effect of soy isolate protein and resistance exercises on muscle performance and bone health of osteopenic/osteoporotic post-menopausal women. *J Women Aging* **2013**, 25:183-198.
68. Soares ALS, Machado-Lima A, Brech GC, Greve JMD, Dos Santos JR, Inojossa TR, Rogero MM, Salles JEN, Santarem-Sobrinho JM, Davis CL, Alonso AC: The Influence of Whey Protein on Muscle Strength, Glycemic Control and Functional Tasks in Older Adults with Type 2 Diabetes Mellitus in a Resistance Exercise Program: Randomized and Triple Blind Clinical Trial. *Int J Environ Res Public Health* **2023**, 20.
69. Sugihara Junior P, Ribeiro AS, Nabuco HCG, Fernandes RR, Tomeleri CM, Cunha PM, Venturini D, Barbosa DS, Schoenfeld BJ, Cyrino ES: Effects of Whey Protein Supplementation Associated With Resistance Training on Muscular Strength, Hypertrophy, and Muscle Quality in Preconditioned Older Women. *Int J Sport Nutr Exerc Metab* **2018**, 28:528-535.
70. Tang W, Yan X, Fan P, Xu D, Li Y: Analysis of the Clinical Effect of Dietary Nutrition Intervention Combined with Resistance Training on the Cognitive Function of Elderly Male Patients with Sarcopenia. *Progr in Mod Biomed* **2020**, 20:2698-2701.
71. Thomson RL, Brinkworth GD, Noakes M, Buckley JD: Muscle strength gains during resistance exercise training are attenuated with soy compared with dairy or usual protein intake in older adults: A randomized controlled trial. *Clin Nutr* **2016**, 35:27-33.
72. Tieland M, Dirks ML, van der Zwaluw N, Verdijk LB, van de Rest O, de Groot LC, van Loon LJ: Protein supplementation increases muscle mass gain during prolonged resistance-type exercise training in frail elderly people: a randomized, double-blind, placebo-controlled trial. *J Am Med Dir Assoc* **2012**, 13:713-719.
73. Dirks ML, Tieland M, Verdijk LB, Losen M, Nilwik R, Mensink M, de Groot LCPGM, van Loon LJC: Protein Supplementation Augments Muscle Fiber Hypertrophy but Does Not Modulate Satellite Cell Content During Prolonged Resistance-Type Exercise Training in Frail Elderly. *J Am Med Dir Assoc* **2017**, 18:608-615.
74. Trevisan MC, Souza JM, Marucci Mde F: Influence of soy protein intake and weight training on the resting energy expenditure of postmenopausal women. *Rev Assoc Med Bras (1992)* **2010**, 56:572-578.
75. Unterberger S, Aschauer R, Zöhrer PA, Draxler A, Franzke B, Strasser EM, Wagner KH, Wessner B: Effects of an increased habitual dietary protein intake followed by resistance training on fitness, muscle quality and body composition of seniors: A randomised controlled trial. *Clin Nutr* **2022**, 41:1034-1045.
76. Verdijk LB, Jonkers RAM, Gleeson BG, Beelen M, Meijer K, Savelberg HHCM, Wodzig KWHW, Dendale P, Van Loon LJC: Protein supplementation before and after exercise does not further augment skeletal muscle hypertrophy after resistance training in elderly men. *American Journal of Clinical Nutrition* **2009**, 89:608-616.
77. Verreijen AM, Verlaan S, Engberink MF, Swinkels S, de Vogel-van den Bosch J, Weijs PJ: A high whey protein-, leucine-, and vitamin D-enriched supplement preserves muscle mass during intentional weight loss in obese older adults: A double-blind randomized controlled trial. *Am J Clin Nutr* **2015**, 101:279-286.
78. Vijayakumaran RK, Daly RM, Tan VPS: " We Want More"-Perspectives of Sarcopenic Older Women on the Feasibility of High-Intensity Progressive Resistance Exercises and a Whey-Protein Nutrition Intervention. *Front Nutr* **2023**, 10:1176523.
79. Vikberg S, Sörlén N, Brandén L, Johansson J, Nordström A, Hult A, Nordström P: Effects of Resistance Training on Functional Strength and Muscle Mass in 70-Year-Old Individuals With Pre-sarcopenia: A Randomized Controlled Trial. *J Am Med Dir Assoc* **2019**, 20:28-34.
80. Villanueva MG, He J, Schroeder ET: Periodized resistance training with and without supplementation improve body composition and performance in older men. *Eur J Appl Physiol* **2014**, 114:891-905.
81. Weisgarber KD, Candow DG, Farthing JP: Whey protein and high-volume resistance training in postmenopausal women. *J Nutr Health Aging* **2015**, 19:511-517.
82. Yamada M, Kimura Y, Ishiyama D, Nishio N, Otobe Y, Tanaka T, Ohji S, Koyama S, Sato A, Suzuki M, et al: Synergistic effect of bodyweight resistance exercise and protein supplementation on skeletal muscle in sarcopenic or dynapenic older adults. *Geriatr Gerontol Int* **2019**.
83. Zdzieblik D, Jendricke P, Oesser S, Gollhofer A, König D: The Influence of Specific Bioactive Collagen Peptides on Body Composition and Muscle Strength in Middle-Aged, Untrained Men: A Randomized Controlled Trial. *Int J Environ Res Public Health* **2021**, 18.
84. Zhao T, Gao HL, Guo NZ, Chea ZM, Wu XY, He DL, Wei LQ, Shen XC, Lv WY: Effect of health education and whey protein supplementation combined with resistance exercise on the intervention of middle — aged and elderly people with sarcopenia. *J Clin Exp Med* **2022**, 12:90-94.
85. Zhu LY, Chan R, Kwok T, Cheng KC, Ha A, Woo J: Effects of exercise and nutrition supplementation in community-dwelling older Chinese people with sarcopenia: a randomized controlled trial. *Age Ageing* **2019**, 48:220-228.

Supplementary table S3. League table for pairwise and network meta-analysis of mean change in muscle mass from baseline

| Direct evidence of pairwise meta-analyses (row compared with column) |                     |                     |                    |                     |                     |                     |                     |                     |                     |                     |                     |                    |
|----------------------------------------------------------------------|---------------------|---------------------|--------------------|---------------------|---------------------|---------------------|---------------------|---------------------|---------------------|---------------------|---------------------|--------------------|
|                                                                      | V1                  | V2                  | V3                 | V4                  | V5                  | V6                  | V7                  | V8                  | V9                  | V10                 | V11                 | V12                |
| V1                                                                   | Meat+RT             |                     |                    |                     |                     | 0.51 (-0.96, 1.97)  |                     |                     |                     |                     | 0.40 (-0.48, 1.28)  |                    |
| V2                                                                   | -0.02 (-0.84, 0.81) | MP+RT               | 0.36 (-0.61, 1.32) |                     |                     | -0.20 (-1.16, 0.76) |                     | 0.62 (-0.14, 1.39)  |                     | 0.75 (-0.72, 2.22)  | 0.55 (0.17, 0.93)   | 1.31 (0.41, 2.22)  |
| V3                                                                   | -0.06 (-0.85, 0.73) | -0.05 (-0.42, 0.32) | WP+RT              | 0.60 (-0.68, 1.88)  |                     | 0.12 (-1.20, 1.45)  |                     |                     | 0.95 (0.52, 1.37)   |                     | 0.56 (0.33, 0.79)   | 1.36 (0.90, 1.83)  |
| V4                                                                   | 0.36 (-0.87, 1.58)  | 0.37 (-0.63, 1.38)  | 0.42 (-0.54, 1.37) | Casein+RT           |                     |                     |                     |                     |                     |                     | 0.39 (-1.03, 1.80)  |                    |
| V5                                                                   | 0.27 (-1.02, 1.57)  | 0.29 (-0.81, 1.39)  | 0.33 (-0.74, 1.41) | -0.08 (-1.51, 1.34) | Peanut+RT           |                     |                     |                     |                     |                     | 0.25 (-0.81, 1.30)  |                    |
| V6                                                                   | 0.17 (-0.64, 0.98)  | 0.19 (-0.28, 0.65)  | 0.23 (-0.19, 0.66) | -0.19 (-1.22, 0.84) | -0.10 (-1.22, 1.02) | SP+RT               |                     | 0.56 (-0.87, 1.99)  |                     | 1.21 (0.58, 1.85)   | 0.40 (-0.05, 0.85)  | 1.06 (0.49, 1.63)  |
| V7                                                                   | 1.61 (-0.12, 3.34)  | 1.62 (0.04, 3.21)   | 1.67 (0.10, 3.24)  | 1.25 (-0.58, 3.08)  | 1.34 (-0.55, 3.22)  | 1.44 (-0.14, 3.01)  | Meat                |                     |                     | -0.45 (-1.92, 1.02) |                     |                    |
| V8                                                                   | 0.77 (-0.21, 1.76)  | 0.79 (0.16, 1.42)   | 0.84 (0.18, 1.49)  | 0.42 (-0.73, 1.56)  | 0.50 (-0.73, 1.73)  | 0.60 (-0.09, 1.30)  | -0.83 (-2.49, 0.82) | MP                  |                     | 0.19 (-1.28, 1.65)  | -0.36 (-1.61, 0.90) | 0.31 (-0.62, 1.24) |
| V9                                                                   | 0.87 (0.02, 1.72)   | 0.89 (0.39, 1.38)   | 0.93 (0.55, 1.32)  | 0.51 (-0.51, 1.53)  | 0.60 (-0.52, 1.72)  | 0.70 (0.17, 1.23)   | -0.74 (-2.34, 0.87) | 0.10 (-0.62, 0.82)  | WP                  |                     | -0.09 (-0.63, 0.45) | 0.31 (-0.18, 0.81) |
| V10                                                                  | 1.16 (0.24, 2.07)   | 1.17 (0.57, 1.77)   | 1.22 (0.65, 1.79)  | 0.80 (-0.30, 1.90)  | 0.88 (-0.30, 2.07)  | 0.99 (0.42, 1.56)   | -0.45 (-1.92, 1.02) | 0.38 (-0.39, 1.15)  | 0.29 (-0.36, 0.93)  | SP                  | -0.77 (-1.45,-0.08) | 0.19 (-0.49, 0.87) |
| V11                                                                  | 0.52 (-0.24, 1.28)  | 0.53 (0.21, 0.86)   | 0.58 (0.36, 0.80)  | 0.16 (-0.80, 1.12)  | 0.25 (-0.81, 1.30)  | 0.35 (-0.04, 0.74)  | -1.09 (-2.65, 0.47) | -0.26 (-0.89, 0.38) | -0.35 (-0.74, 0.04) | -0.64 (-1.18,-0.10) | RT                  | 0.79 (0.42, 1.15)  |
| V12                                                                  | 1.23 (0.41, 2.04)   | 1.24 (0.83, 1.65)   | 1.29 (0.96, 1.62)  | 0.87 (-0.13, 1.87)  | 0.95 (-0.14, 2.05)  | 1.06 (0.63, 1.49)   | -0.38 (-1.95, 1.19) | 0.45 (-0.19, 1.09)  | 0.36 (-0.07, 0.78)  | 0.07 (-0.48, 0.62)  | 0.71 (0.40, 1.02)   | RC                 |
| Relative effects of NMA (column compared with row)                   |                     |                     |                    |                     |                     |                     |                     |                     |                     |                     |                     |                    |

Pairwise (upper right portion) and network (lower left portion) meta-analysis results are presented for mean change (from baseline) in global function. Effect estimation is presented in standardized mean difference with 95% confidence interval. Significant results (p <0.05) are marked in red.

MP, milk protein; RC, regular care; RT, resistance training; SP, soy protein; WP, whey protein.

Supplementary table S4. League table for pairwise and network meta-analysis of mean change in handgrip strength from baseline

| Direct evidence of pairwise meta-analyses (row compared with column) |                    |                    |                    |                    |                      |                     |                     |                     |                     |
|----------------------------------------------------------------------|--------------------|--------------------|--------------------|--------------------|----------------------|---------------------|---------------------|---------------------|---------------------|
|                                                                      | V1                 | V2                 | V3                 | V4                 | V5                   | V6                  | V7                  | V8                  | V9                  |
| V1                                                                   | WP+RT              | 0.43 (-1.50, 2.36) | .                  | 1.93 (-0.04, 3.90) | .                    | 0.86 (0.11, 1.61)   | .                   | 0.31 (-0.16, 0.79)  | 1.53 (0.88, 2.19)   |
| V2                                                                   | 0.06 (-0.85, 0.98) | SP+RT              | 0.18 (-1.73, 2.09) | .                  | .                    | .                   | 2.46 (0.44, 4.48)   | 0.45 (-0.52, 1.42)  | 1.51 (0.11, 2.90)   |
| V3                                                                   | 0.19 (-0.55, 0.92) | 0.12 (-0.88, 1.12) | MP+RT              | .                  | .                    | .                   | .                   | 0.39 (-0.26, 1.04)  | 0.22 (-1.68, 2.13)  |
| V4                                                                   | 0.22 (-1.11, 1.55) | 0.16 (-1.39, 1.71) | 0.03 (-1.41, 1.48) | Casein+RT          | .                    | .                   | .                   | -0.58 (-2.52, 1.37) | 2.98 (0.99, 4.97)   |
| V5                                                                   | 2.32 (0.59, 4.06)  | 2.26 (0.37, 4.15)  | 2.14 (0.33, 3.94)  | 2.10 (-0.02, 4.23) | Meat+RT              | .                   | .                   | -1.83 (-3.79, 0.12) | -0.88 (-2.82, 1.05) |
| V6                                                                   | 0.99 (0.31, 1.67)  | 0.93 (-0.14, 2.00) | 0.80 (-0.11, 1.72) | 0.77 (-0.67, 2.21) | -1.33 (-3.15, 0.48)  | WP                  | .                   | -0.38 (-1.27, 0.51) | 0.12 (-0.77, 1.01)  |
| V7                                                                   | 1.16 (-0.52, 2.85) | 1.10 (-0.61, 2.82) | 0.98 (-0.77, 2.72) | 0.94 (-1.14, 3.03) | -1.16 (-3.51, 1.19)  | 0.17 (-1.59, 1.94)  | SP                  | -0.03 (-2.00, 1.94) | 0.90 (-1.08, 2.88)  |
| V8                                                                   | 0.47 (0.03, 0.92)  | 0.41 (-0.45, 1.27) | 0.29 (-0.32, 0.89) | 0.25 (-1.07, 1.58) | -1.85 (-3.56, -0.14) | -0.52 (-1.22, 0.18) | -0.69 (-2.34, 0.96) | RT                  | 0.56 (-0.13, 1.26)  |
| V9                                                                   | 1.46 (0.92, 2.00)  | 1.40 (0.47, 2.33)  | 1.27 (0.50, 2.04)  | 1.24 (-0.08, 2.56) | -0.87 (-2.57, 0.84)  | 0.47 (-0.26, 1.20)  | 0.29 (-1.37, 1.96)  | 0.99 (0.44, 1.53)   | RC                  |
| Relative effects of NMA (column compared with row)                   |                    |                    |                    |                    |                      |                     |                     |                     |                     |

Pairwise (upper right portion) and network (lower left portion) meta-analysis results are presented for mean change (from baseline) in global function. Effect estimation is presented in standardized mean difference with 95% confidence interval. Significant results (p <0.05) are marked in red.

MP, milk protein; RC, regular care; RT, resistance training; SP, soy protein; WP, whey protein.

Supplementary table S5. League table for pairwise and network meta-analysis of mean change in leg strength from baseline

| Direct evidence of pairwise meta-analyses (row compared with column) |                    |                     |                    |                     |                    |                      |                      |                     |                     |                     |                     |
|----------------------------------------------------------------------|--------------------|---------------------|--------------------|---------------------|--------------------|----------------------|----------------------|---------------------|---------------------|---------------------|---------------------|
|                                                                      | V1                 | V2                  | V3                 | V4                  | V5                 | V6                   | V7                   | V8                  | V9                  | V10                 | V11                 |
| V1                                                                   | WP+RT              | -0.12 (-1.02; 0.79) | 0.74 (-0.50; 1.98) | .                   | 0.33 (-0.85; 1.52) | 1.30 (0.76; 1.84)    | .                    | .                   | .                   | 0.45 (0.20; 0.69)   | 1.30 (0.73; 1.87)   |
| V2                                                                   | 0.08 (-0.32; 0.49) | MP+RT               | 0.32 (-0.87; 1.52) | .                   | .                  | .                    | .                    | 0.70 (-0.13; 1.54)  | .                   | 0.34 (-0.08; 0.76)  | 0.69 (-0.47; 1.85)  |
| V3                                                                   | 0.09 (-0.34; 0.51) | 0.00 (-0.50; 0.50)  | SP+RT              | -0.42 (-1.81; 0.96) | .                  | .                    | 1.92 (1.16; 2.68)    | .                   | .                   | 0.14 (-0.29; 0.57)  | 1.73 (1.14; 2.32)   |
| V4                                                                   | 0.14 (-0.60; 0.88) | 0.06 (-0.73; 0.85)  | 0.05 (-0.70; 0.81) | Meat+RT             | .                  | .                    | .                    | .                   | .                   | 0.13 (-0.68; 0.94)  | .                   |
| V5                                                                   | 0.33 (-0.85; 1.52) | 0.25 (-1.01; 1.50)  | 0.24 (-1.02; 1.50) | 0.19 (-1.21; 1.59)  | Casein+RT          | .                    | .                    | .                   | .                   | .                   | .                   |
| V6                                                                   | 1.26 (0.78; 1.74)  | 1.17 (0.58; 1.77)   | 1.17 (0.58; 1.77)  | 1.12 (0.27; 1.97)   | 0.93 (-0.35; 2.21) | WP                   | .                    | .                   | .                   | -0.64 (-1.32; 0.03) | 0.20 (-0.46; 0.85)  |
| V7                                                                   | 1.38 (0.70; 2.05)  | 1.29 (0.57; 2.02)   | 1.29 (0.63; 1.95)  | 1.24 (0.29; 2.18)   | 1.04 (-0.32; 2.41) | 0.12 (-0.66; 0.90)   | SP                   | .                   | 0.39 (-1.00; 1.77)  | -0.58 (-1.47; 0.31) | 0.41 (-0.32; 1.14)  |
| V8                                                                   | 1.10 (0.39; 1.81)  | 1.02 (0.33; 1.70)   | 1.02 (0.26; 1.77)  | 0.96 (-0.02; 1.94)  | 0.77 (-0.61; 2.15) | -0.16 (-0.97; 0.66)  | -0.27 (-1.18; 0.64)  | MP                  | .                   | -0.47 (-1.63; 0.69) | -0.05 (-0.91; 0.82) |
| V9                                                                   | 1.76 (0.22; 3.30)  | 1.68 (0.11; 3.24)   | 1.67 (0.14; 3.21)  | 1.62 (-0.05; 3.30)  | 1.43 (-0.51; 3.37) | 0.50 (-1.09; 2.09)   | 0.39 (-1.00; 1.77)   | 0.66 (-1.00; 2.32)  | Meat                | .                   | .                   |
| V10                                                                  | 0.43 (0.20; 0.66)  | 0.35 (-0.02; 0.71)  | 0.35 (-0.03; 0.72) | 0.29 (-0.41; 1.00)  | 0.10 (-1.11; 1.31) | -0.83 (-1.31; -0.34) | -0.94 (-1.59; -0.30) | -0.67 (-1.36; 0.02) | -1.33 (-2.86; 0.20) | RT                  | 0.94 (0.53; 1.36)   |
| V11                                                                  | 1.41 (1.03; 1.79)  | 1.33 (0.86; 1.80)   | 1.32 (0.88; 1.77)  | 1.27 (0.49; 2.05)   | 1.08 (-0.17; 2.32) | 0.15 (-0.37; 0.67)   | 0.03 (-0.61; 0.68)   | 0.31 (-0.38; 1.00)  | -0.35 (-1.88; 1.18) | 0.98 (0.63; 1.33)   | RC                  |
| Relative effects of NMA (column compared with row)                   |                    |                     |                    |                     |                    |                      |                      |                     |                     |                     |                     |

Pairwise (upper right portion) and network (lower left portion) meta-analysis results are presented for mean change (from baseline) in global function. Effect estimation is presented in standardized mean difference with 95% confidence interval. Significant results (p <0.05) are marked in red.  
MP, milk protein; RC, regular care; RT, resistance training; SP, soy protein; WP, whey protein.



Supplementary table S6. League table for pairwise and network meta-analysis of mean change in walking speed from baseline

| Direct evidence of pairwise meta-analyses (row compared with column) |                    |                    |                    |                     |                    |                     |                     |                     |                     |
|----------------------------------------------------------------------|--------------------|--------------------|--------------------|---------------------|--------------------|---------------------|---------------------|---------------------|---------------------|
|                                                                      | V1                 | V2                 | V3                 | V4                  | V5                 | V6                  | V7                  | V8                  | V9                  |
| V1                                                                   | WP+RT              | .                  | .                  | -0.29 (-1.51; 0.93) | 0.31 (-0.09; 0.70) | .                   | .                   | 0.20 (-0.09; 0.49)  | 0.84 (0.43; 1.25)   |
| V2                                                                   | 0.14 (-0.50; 0.78) | SP+RT              | .                  | -0.27 (-1.44; 0.89) | .                  | 0.37 (-0.82; 1.56)  | .                   | 0.22 (-0.46; 0.90)  | 0.55 (-0.28; 1.37)  |
| V3                                                                   | 0.17 (-0.62; 0.97) | 0.03 (-0.92; 0.99) | Meat+RT            | .                   | .                  | .                   | .                   | 0.20 (-0.60; 1.01)  | 0.04 (-1.15; 1.22)  |
| V4                                                                   | 0.20 (-0.24; 0.64) | 0.06 (-0.61; 0.73) | 0.03 (-0.81; 0.87) | MP+RT               | .                  | .                   | 0.72 (-0.11; 1.54)  | -0.04 (-0.46; 0.37) | 0.19 (-0.94; 1.32)  |
| V5                                                                   | 0.20 (-0.17; 0.57) | 0.06 (-0.63; 0.74) | 0.02 (-0.81; 0.86) | -0.00 (-0.52; 0.52) | WP                 | .                   | .                   | 0.18 (-0.31; 0.67)  | 0.76 (0.30; 1.22)   |
| V6                                                                   | 0.37 (-0.65; 1.40) | 0.23 (-0.82; 1.28) | 0.20 (-1.05; 1.44) | 0.17 (-0.89; 1.23)  | 0.17 (-0.88; 1.23) | SP                  | .                   | -0.13 (-1.32; 1.06) | 0.47 (-0.72; 1.66)  |
| V7                                                                   | 0.95 (0.15; 1.75)  | 0.81 (-0.14; 1.76) | 0.78 (-0.29; 1.85) | 0.75 (0.00; 1.50)   | 0.76 (-0.09; 1.60) | 0.58 (-0.67; 1.83)  | MP                  | -0.53 (-1.66; 0.60) | -0.28 (-1.41; 0.85) |
| V8                                                                   | 0.22 (-0.05; 0.49) | 0.07 (-0.53; 0.67) | 0.04 (-0.71; 0.80) | 0.02 (-0.36; 0.39)  | 0.02 (-0.36; 0.40) | -0.16 (-1.16; 0.85) | -0.74 (-1.51; 0.03) | RT                  | 0.59 (0.22; 0.95)   |
| V9                                                                   | 0.73 (0.39; 1.07)  | 0.59 (-0.03; 1.21) | 0.56 (-0.23; 1.35) | 0.53 (0.07; 1.00)   | 0.53 (0.13; 0.94)  | 0.36 (-0.65; 1.37)  | -0.22 (-1.02; 0.57) | 0.52 (0.19; 0.84)   | RC                  |
| Relative effects of NMA (column compared with row)                   |                    |                    |                    |                     |                    |                     |                     |                     |                     |

Pairwise (upper right portion) and network (lower left portion) meta-analysis results are presented for mean change (from baseline) in global function. Effect estimation is presented in standardized mean difference with 95% confidence interval. Significant results (p <0.05) are marked in red.  
MP, milk protein; RC, regular care; RT, resistance training; SP, soy protein; WP, whey protein.

Supplementary table S7. League table for pairwise and network meta-analysis of mean change in chair rise from baseline

| Direct evidence of pairwise meta-analyses (row compared with column) |                     |                     |                     |                     |                     |                      |                      |                    |
|----------------------------------------------------------------------|---------------------|---------------------|---------------------|---------------------|---------------------|----------------------|----------------------|--------------------|
|                                                                      | V1                  | V2                  | V3                  | V4                  | V5                  | V6                   | V7                   | V8                 |
| V1                                                                   | WP+RT               | -0.00 (-0.71; 0.71) | 0.25 (-0.57; 1.07)  | .                   | .                   | 0.85 (0.46; 1.25)    | 0.12 (-0.05; 0.29)   | 0.98 (0.64; 1.32)  |
| V2                                                                   | -0.04 (-0.46; 0.38) | SP+RT               | .                   | .                   | .                   | .                    | 0.17 (-0.29; 0.63)   | 0.92 (0.31; 1.54)  |
| V3                                                                   | 0.22 (-0.04; 0.48)  | 0.26 (-0.20; 0.72)  | MP+RT               | .                   | 0.31 (-0.37; 0.99)  | .                    | -0.04 (-0.28; 0.20)  | 0.40 (-0.23; 1.03) |
| V4                                                                   | 0.49 (-0.11; 1.10)  | 0.53 (-0.18; 1.24)  | 0.27 (-0.35; 0.89)  | Meat+RT             | .                   | .                    | -0.35 (-0.93; 0.23)  | .                  |
| V5                                                                   | 0.53 (-0.20; 1.26)  | 0.57 (-0.25; 1.39)  | 0.31 (-0.37; 0.99)  | 0.04 (-0.88; 0.95)  | MP                  | .                    | .                    | .                  |
| V6                                                                   | 0.70 (0.36; 1.04)   | 0.74 (0.22; 1.25)   | 0.48 (0.08; 0.87)   | 0.20 (-0.47; 0.88)  | 0.17 (-0.62; 0.95)  | WP                   | -0.55 (-0.95; -0.16) | 0.02 (-0.36; 0.41) |
| V7                                                                   | 0.14 (-0.02; 0.31)  | 0.18 (-0.23; 0.59)  | -0.08 (-0.30; 0.15) | -0.35 (-0.93; 0.23) | -0.38 (-1.10; 0.33) | -0.55 (-0.89; -0.21) | RT                   | 0.82 (0.53; 1.11)  |
| V8                                                                   | 0.84 (0.57; 1.10)   | 0.87 (0.44; 1.31)   | 0.62 (0.31; 0.92)   | 0.34 (-0.29; 0.97)  | 0.31 (-0.44; 1.05)  | 0.14 (-0.21; 0.49)   | 0.69 (0.44; 0.94)    | RC                 |

Relative effects of NMA (column compared with row)

Pairwise (upper right portion) and network (lower left portion) meta-analysis results are presented for mean change (from baseline) in global function. Effect estimation is presented in standardized mean difference with 95% confidence interval. Significant results (p <0.05) are marked in red.  
MP, milk protein; RC, regular care; RT, resistance training; SP, soy protein; WP, whey protein.

**Supplementary table S8. League table for pairwise and network meta-analysis of mean change in global physical mobility (SPPB) from baseline**

| Direct evidence of pairwise meta-analyses (row compared with column) |                          |                          |                     |                          |                          |                          |
|----------------------------------------------------------------------|--------------------------|--------------------------|---------------------|--------------------------|--------------------------|--------------------------|
|                                                                      | V1                       | V2                       | V3                  | V4                       | V5                       | V6                       |
| V1                                                                   | <b>WP+RT</b>             | .                        | .                   | 0.01 (-1.23; 1.25)       | 0.03 (-0.52; 0.58)       | <b>1.79 (1.09; 2.48)</b> |
| V2                                                                   | 0.49 (-0.21; 1.18)       | <b>MP+RT</b>             | .                   | .                        | -0.03 (-0.62; 0.56)      | 0.33 (-0.80; 1.46)       |
| V3                                                                   | 0.55 (-0.76; 1.86)       | 0.07 (-1.31; 1.44)       | <b>Casein+RT</b>    | .                        | .                        | 0.90 (-0.26; 2.06)       |
| V4                                                                   | 0.25 (-0.81; 1.31)       | -0.24 (-1.40; 0.93)      | -0.30 (-1.90; 1.29) | <b>WP</b>                | 0.32 (-0.91; 1.56)       | 0.63 (-0.64; 1.89)       |
| V5                                                                   | 0.29 (-0.23; 0.80)       | -0.20 (-0.74; 0.34)      | -0.27 (-1.61; 1.07) | 0.04 (-1.03; 1.11)       | <b>RT</b>                | 0.30 (-0.95; 1.55)       |
| V6                                                                   | <b>1.45 (0.84; 2.07)</b> | <b>0.97 (0.22; 1.71)</b> | 0.90 (-0.26; 2.06)  | <b>1.21 (0.11; 2.30)</b> | <b>1.17 (0.49; 1.84)</b> | <b>RC</b>                |
| Relative effects of NMA (column compared with row)                   |                          |                          |                     |                          |                          |                          |

Pairwise (upper right portion) and network (lower left portion) meta-analysis results are presented for mean change (from baseline) in global function. Effect estimation is presented in standardized mean difference with 95% confidence interval. Significant results ( $p < 0.05$ ) are marked in red. MP, milk protein; RC, regular care; RT, resistance training; SPPB, Short Physical Performance Battery; WP, whey protein.

**Supplementary table S9. League table for pairwise and network meta-analysis of mean change in timed up-and-go task from baseline**

|                                                    | Direct evidence of pairwise meta-analyses (row compared with column) |                    |                    |                     |                     |                    |
|----------------------------------------------------|----------------------------------------------------------------------|--------------------|--------------------|---------------------|---------------------|--------------------|
|                                                    | V1                                                                   | V2                 | V3                 | V4                  | V5                  | V6                 |
| V1                                                 | <b>MP+RT</b>                                                         | .                  | .                  | .                   | 0.21 (-0.49; 0.90)  | 0.33 (-0.16; 0.82) |
| V2                                                 | 0.17 (-0.54; 0.89)                                                   | <b>WP+RT</b>       | .                  | 0.48 (-0.12; 1.08)  | 0.03 (-0.15; 0.22)  | .                  |
| V3                                                 | 0.18 (-0.56; 0.92)                                                   | 0.01 (-0.31; 0.32) | <b>Meat+RT</b>     | .                   | 0.03 (-0.23; 0.28)  | .                  |
| V4                                                 | 0.62 (-0.25; 1.49)                                                   | 0.45 (-0.08; 0.97) | 0.44 (-0.14; 1.03) | <b>SP+RT</b>        | -0.38 (-0.98; 0.21) | .                  |
| V5                                                 | 0.21 (-0.49; 0.90)                                                   | 0.03 (-0.15; 0.22) | 0.03 (-0.23; 0.28) | -0.42 (-0.94; 0.11) | <b>RT</b>           | .                  |
| V6                                                 | 0.33 (-0.16; 0.82)                                                   | 0.15 (-0.72; 1.02) | 0.15 (-0.74; 1.03) | -0.30 (-1.30; 0.70) | 0.12 (-0.73; 0.97)  | <b>RC</b>          |
| Relative effects of NMA (column compared with row) |                                                                      |                    |                    |                     |                     |                    |

Pairwise (upper right portion) and network (lower left portion) meta-analysis results are presented for mean change (from baseline) in global function. Effect estimation is presented in standardized mean difference with 95% confidence interval.

MP, milk protein; RC, regular care; RT, resistance training; SP, soy protein; WP, whey protein.

Table S10. Associations of moderators with treatment efficiency for main outcomes.

| Moderator                       | Muscle mass |              |               |              |               |              | Muscle strength   |               |               |               |                |               |                     |               |               |               |                |               |
|---------------------------------|-------------|--------------|---------------|--------------|---------------|--------------|-------------------|---------------|---------------|---------------|----------------|---------------|---------------------|---------------|---------------|---------------|----------------|---------------|
|                                 |             |              |               |              |               |              | Handgrip strength |               |               |               |                |               | Leg muscle strength |               |               |               |                |               |
|                                 | N           | B            | SE            | Median       | 95% CrI       |              | N                 | B             | SE            | Median        | 95% CrI        |               | N                   | B             | SE            | Median        | 95% CrI        |               |
| Participant factor              |             |              |               |              |               |              |                   |               |               |               |                |               |                     |               |               |               |                |               |
| Age                             | 65          | −0.268       | 0.0021        | −0.27        | −0.836,       | 0.319        | 32                | 0.152         | 0.0032        | 0.159         | −0.760,        | 1.027         | 58                  | −0.623        | 0.0021        | −0.622        | −1.226,        | −0.035        |
| BMI                             | 63          | 0.331        | 0.0018        | 0.331        | −0.162,       | 0.839        | 30                | −0.868        | 0.0039        | −0.870        | −1.944,        | 0.251         | 45                  | 0.506         | 0.0024        | 0.503         | −0.157,        | 1.185         |
| Sex distribution <sup>b</sup>   | 64          | −0.484       | 0.0026        | −0.468       | −1.204,       | 0.227        | <b>32</b>         | <b>−1.719</b> | <b>0.0035</b> | <b>−1.720</b> | <b>−2.682,</b> | <b>−0.768</b> | 46                  | −0.151        | 0.0030        | −0.143        | −1.018,        | 0.671         |
| Area of population <sup>c</sup> | 65          | −0.472       | 0.0026        | −0.468       | −1.177,       | 0.242        | <b>31</b>         | <b>−1.036</b> | <b>0.0035</b> | <b>−1.036</b> | <b>−1.999,</b> | <b>−0.072</b> | <b>57</b>           | <b>−0.860</b> | <b>0.0029</b> | <b>−0.855</b> | <b>−1.698,</b> | <b>−0.050</b> |
| Health status <sup>d</sup>      | <b>65</b>   | <b>0.743</b> | <b>0.0018</b> | <b>0.744</b> | <b>0.224,</b> | <b>1.247</b> | 32                | 0.16          | 0.0042        | 0.156         | −1.012,        | 1.33          | 58                  | −0.709        | 0.0026        | −0.709        | −1.416,        | 0.001         |
| Study design factor             |             |              |               |              |               |              |                   |               |               |               |                |               |                     |               |               |               |                |               |
| ROB <sup>e</sup>                | 65          | 0.209        | 0.0025        | 0.209        | −0.492,       | 0.899        | 32                | 0.209         | 0.0053        | 0.227         | −1.280,        | 1.666         | 58                  | 0.689         | 0.0027        | 0.684         | −0.062,        | 1.432         |
| Follow-up duration              | 65          | −0.07        | 0.0014        | −0.072       | −0.454,       | 0.315        | 32                | 0.386         | 0.0057        | 0.386         | −1.233,        | 2.009         | 58                  | −0.430        | 0.0016        | −0.432        | −0.873,        | 0.041         |
| Intervention factor             |             |              |               |              |               |              |                   |               |               |               |                |               |                     |               |               |               |                |               |
| PS dose                         | 65          | 0.239        | 0.0025        | 0.242        | −0.475,       | 0.929        | 32                | 0.239         | 0.0025        | 0.242         | −0.475,        | 0.929         | <b>58</b>           | <b>0.755</b>  | <b>0.0025</b> | <b>0.752</b>  | <b>0.060,</b>  | <b>1.474</b>  |
| % 1-RM                          | 61          | 0.141        | 0.0019        | 0.141        | −0.417,       | 0.696        | 29                | 0.048         | 0.0034        | 0.044         | −0.873,        | 0.998         | 47                  | 0.425         | 0.0023        | 0.419         | −0.211,        | 1.079         |
| Treatment duration              | 65          | −0.025       | 0.0014        | −0.023       | −0.419,       | 0.338        | 32                | 0.801         | 0.0053        | 0.819         | −0.757,        | 2.204         | 58                  | −0.378        | 0.0015        | −0.379        | −0.807,        | 0.052         |

To be continued.

Table S10. Continued.

| Moderator                       | Physical mobility |        |        |        |         |       |            |        |        |        |         |       |                 |        |        |        |          |        |      |               |               |               |                |               |
|---------------------------------|-------------------|--------|--------|--------|---------|-------|------------|--------|--------|--------|---------|-------|-----------------|--------|--------|--------|----------|--------|------|---------------|---------------|---------------|----------------|---------------|
|                                 | Walking speed     |        |        |        |         |       | Chair rise |        |        |        |         |       | Timed up and go |        |        |        |          |        | SPPB |               |               |               |                |               |
|                                 | N                 | B      | SE     | Median | 95% CrI |       | N          | B      | SE     | Median | 95% CrI |       | N               | B      | SE     | Median | 95% CrI  |        | N    | B             | SE            | Median        | 95% CrI        |               |
| Participant factor              |                   |        |        |        |         |       |            |        |        |        |         |       |                 |        |        |        |          |        |      |               |               |               |                |               |
| Age                             | 34                | −0.093 | 0.002  | −0.089 | −0.655, | 0.447 | 27         | −0.555 | 0.0045 | −0.554 | −1.816  | 0.702 | 11              | 0.042  | 0.0215 | 0.003  | −6.272,  | 6.998  | 13   | −0.363        | 0.0085        | −0.332        | −2.92          | 2.021         |
| BMI                             | 33                | 0.113  | 0.0019 | 0.114  | −0.403, | 0.638 | 26         | 0.222  | 0.0037 | 0.219  | −0.806, | 1.247 | 11              | 0.064  | 0.0129 | −0.044 | −3.230,  | 4.488  | 13   | <b>−1.846</b> | <b>0.0037</b> | <b>−1.843</b> | <b>−2.885,</b> | <b>−0.813</b> |
| Sex distribution <sup>b</sup>   | 34                | 0.254  | 0.0019 | −0.260 | −0.254, | 0.772 | 26         | −0.079 | 0.0133 | −0.081 | −3.873, | 3.721 | 10              | 0.208  | 0.0366 | 0.003  | −5.546,  | 7.263  | 13   | <b>−1.614</b> | <b>0.003</b>  | <b>−1.609</b> | <b>−2.471,</b> | <b>−0.785</b> |
| Area of population <sup>c</sup> | 34                | −0.154 | 0.0017 | −0.154 | −0.635, | 0.335 | 27         | 0.172  | 0.0042 | 0.172  | −1.004, | 1.35  | 11              | 0.383  | 0.0242 | 0.027  | −5.686,  | 10.551 | 13   | 0.147         | 0.0053        | 0.134         | −1.302,        | 1.638         |
| Health status <sup>d</sup>      | 34                | −0.279 | 0.002  | −0.278 | −0.832, | 0.268 | 27         | −1.214 | 0.0061 | −1.218 | −2.863, | 0.482 | 11              | −0.123 | 0.0017 | −0.022 | −5.595,  | 4.467  | 13   | 0.149         | 0.038         | 0.201         | −12.667,       | 11.774        |
| Study design factor             |                   |        |        |        |         |       |            |        |        |        |         |       |                 |        |        |        |          |        |      |               |               |               |                |               |
| ROB <sup>e</sup>                | 34                | 0.471  | 0.0024 | 0.469  | −0.173, | 1.136 | 27         | 0.173  | 0.0064 | 0.155  | −0.587, | 2.007 | 11              | −0.242 | 0.0266 | −0.021 | −10.733, | 5.884  | 13   | 0.54          | 0.0465        | 0.153         | −12.252,       | 16.765        |
| Follow-up duration              | 34                | −0.346 | 0.0015 | −0.346 | −0.781, | 0.088 | 27         | −0.054 | 0.0045 | −0.079 | −1.242, | 1.243 | 11              | −0.653 | 0.0273 | −0.045 | −10.950, | 5.832  | 13   | <b>1.405</b>  | <b>0.0023</b> | <b>1.404</b>  | <b>0.772,</b>  | <b>2.031</b>  |
| Intervention factor             |                   |        |        |        |         |       |            |        |        |        |         |       |                 |        |        |        |          |        |      |               |               |               |                |               |
| PS dose                         | 34                | −0.169 | 0.0022 | −0.168 | −0.768, | 0.424 | 27         | 0.081  | 0.0038 | 0.082  | −0.973, | 1.161 | 11              | 0.09   | 0.0273 | 0.001  | −8.695,  | 9.259  | 13   | −1.2          | 0.0056        | −1.196        | −2.816,        | 0.372         |
| % 1-RM                          | 31                | 0.099  | 0.0015 | 0.01   | −0.319, | 0.521 | 25         | 0.249  | 0.0039 | 0.261  | −0.372, | 1.242 | 11              | −0.021 | 0.0213 | −0.01  | −6.394,  | 6.862  | 13   | −0.841        | 0.0041        | −0.879        | −1.940,        | 0.455         |
| Treatment duration              | 34                | −0.294 | 0.0015 | −0.297 | −0.713, | 0.143 | 27         | 0.085  | 0.008  | 0.07   | −2.114, | 2.364 | 11              | −0.421 | 0.0299 | 0.001  | −14.443, | 7.278  | 13   | <b>1.411</b>  | <b>0.0023</b> | <b>1.409</b>  | <b>0.778,</b>  | <b>2.051</b>  |

<sup>a</sup>Data represents the change in effects associated with the moderator indicated. B, beta coefficient; SE, standard error; 95% CrI, 95% credibility interval. Significant results (p <0.05) are marked in bold.

<sup>b</sup>The proportion of female participants in sample.

<sup>c</sup>Code for regression model: America = 1; Asian = 2; Europe = 3; Oceania = 4.

<sup>d</sup>Code for regression model: Health = 1; Subhealthy = 2.

<sup>e</sup>Code for regression model: Low risk of bias = 0; High risk of bias = 1.

% 1-RM, percentage of one repetition maximum; 95% CrI, credible interval; BMI, body mass index; PS, protein supplementation; ROB, risk of bias; SPPB, Short Physical Performance Battery.

**Table S11. Summary of compliance & adverse events.**

| Study (year)<br>(reference number) <sup>a</sup> | Study arm       | Group<br>sample (n) | Withdraw, attrition rate, or drop out<br>(number of patients) |               |                        |           | Side effects and complications<br>(number of patients) |               |                        |           | Serious adverse event <sup>b</sup><br>(number of patients) |                        |           |
|-------------------------------------------------|-----------------|---------------------|---------------------------------------------------------------|---------------|------------------------|-----------|--------------------------------------------------------|---------------|------------------------|-----------|------------------------------------------------------------|------------------------|-----------|
|                                                 |                 |                     | Related to PS                                                 | Related to RT | Unrelated to treatment | Total sum | Related to PS                                          | Related to RT | Unrelated to treatment | Total sum | Related to treatment                                       | Unrelated to treatment | Total sum |
|                                                 |                 |                     |                                                               |               |                        |           |                                                        |               |                        |           |                                                            |                        |           |
| Aas 2019 [1]                                    | Gr 1: MP+RT     | 11                  | 0                                                             | 0             | 0                      | 0         | 0                                                      | 0             | 0                      | 0         | 0                                                          | 0                      | 0         |
|                                                 | Gr 2: RC        | 11                  |                                                               |               | 0                      | 0         |                                                        |               | 0                      | 0         | 0                                                          | 0                      | 0         |
| Amasene<br>2019 [2]; 2021 [3]                   | Gr 1: WP+RT     | 21                  | 2                                                             | 3             | 1                      | 6         | 1                                                      | 0             | 0                      | 1         | 0                                                          | 1                      | 1         |
|                                                 | Gr 2: PLA+RT    | 20                  | 0                                                             | 3             | 4                      | 7         | 0                                                      | 0             | 0                      | 0         | 0                                                          | 2                      | 2         |
| Arciero 2014 [4]                                | Gr 1: WP+RT     | 27                  | 1                                                             | 4             | 0                      | 5         | NR                                                     | NR            | NR                     |           | NR                                                         | NR                     |           |
|                                                 | Gr 2: WP        | 24                  | 6                                                             |               | 0                      | 6         | NR                                                     |               | NR                     |           | NR                                                         | NR                     |           |
| Arnarson 2013 [5]                               | Gr 1: WP+RT     | 83                  | 0                                                             | 0             | 8                      | 8         | NR                                                     | NR            | NR                     |           | NR                                                         | NR                     |           |
|                                                 | Gr 2: PLA+RT    | 78                  | 0                                                             | 0             | 12                     | 12        | NR                                                     | NR            | NR                     |           | NR                                                         | NR                     |           |
| Bagheri 2022 [6]                                | Gr 1: WP+RT     | 14                  | 0                                                             | 0             | 0                      | 0         | 0                                                      | 0             | 0                      | 0         | 0                                                          | 0                      | 0         |
|                                                 | Gr 2: PLA+RT    | 14                  | 0                                                             | 0             | 0                      | 0         | 0                                                      | 0             | 0                      | 0         | 0                                                          | 0                      | 0         |
| Bijeh 2022 [7]                                  | Gr 1: SP+RT     | 15                  | 0                                                             | 0             | 0                      | 0         | 0                                                      | 0             | 0                      | 0         | 0                                                          | 0                      | 0         |
|                                                 | Gr 2: RT        | 15                  |                                                               | 0             | 0                      | 0         |                                                        | 0             | 0                      | 0         | 0                                                          | 0                      | 0         |
|                                                 | Gr 3: SP        | 15                  | 0                                                             |               | 0                      | 0         | 0                                                      |               | 0                      | 0         | 0                                                          | 0                      | 0         |
|                                                 | Gr 4: RC        | 15                  |                                                               |               | 0                      | 0         |                                                        |               | 0                      | 0         | 0                                                          | 0                      | 0         |
| Candow 2006 [8]                                 | Gr 1: WP+RT     | 25                  | 0                                                             | 0             | 6                      | 6         | NR                                                     | NR            | NR                     |           | NR                                                         | NR                     |           |
|                                                 | Gr 2: PLA+RT    | 13                  | 0                                                             | 0             | 3                      | 3         | NR                                                     | NR            | NR                     |           | NR                                                         | NR                     |           |
| Candow 2008 [9]                                 | Gr 1: WP+Cre+RT | 12                  | 0                                                             | 0             | 2                      | 2         | 1                                                      | 0             | 0                      | 1         | NR                                                         | NR                     |           |
|                                                 | Gr 2: Cre+RT    | 14                  | 0                                                             | 0             | 1                      | 1         | 1                                                      | 1             | 0                      | 2         | NR                                                         | NR                     |           |
|                                                 | Gr 3: PLA+RT    | 14                  | 0                                                             | 0             | 2                      | 2         | 2                                                      | 2             | 0                      | 4         | 0                                                          | 0                      | 0         |
| Chale 2013 [10]                                 | Gr 1: WP+RT     | 42                  | 0                                                             | 0             | 3                      | 3         | 4                                                      | 1             | 9                      | 14        | 0                                                          | 6                      | 6         |
|                                                 | Gr 2: PLA+RT    | 38                  | 0                                                             | 0             | 2                      | 2         | 2                                                      | 3             | 15                     | 20        | 0                                                          | 3                      | 3         |
| Chang 2019 [11]                                 | Gr 1: Casein+RT | 28                  | 0                                                             | 0             | 0                      | 0         | NR                                                     | NR            | NR                     |           | NR                                                         | NR                     |           |
|                                                 | Gr 2: RC        | 28                  |                                                               |               | 0                      | 0         |                                                        |               | NR                     |           | NR                                                         | NR                     |           |
| Chen 2017 [12]                                  | Gr 1: WP+RT     | 20                  | 0                                                             | 0             | 0                      | 0         | NR                                                     | NR            | NR                     |           | NR                                                         | NR                     |           |
|                                                 | Gr 2: RC        | 20                  |                                                               |               | 0                      | 0         |                                                        |               | NR                     |           | NR                                                         | NR                     |           |
| Colonetti<br>2023 [13]                          | Gr 1: WP+RT     | 10                  | 0                                                             | 2             | 0                      | 2         | 0                                                      | 0             | 0                      | 0         | 0                                                          | 0                      | 0         |
|                                                 | Gr 2: PLA+RT    | 10                  | 0                                                             | 0             | 0                      | 0         | 0                                                      | 0             | 0                      | 0         | 0                                                          | 0                      | 0         |
|                                                 | Gr 3: RC        | 10                  |                                                               |               | 2                      | 2         |                                                        |               | 0                      | 0         | 0                                                          | 0                      | 0         |
| Daly 2014 [14]                                  | Gr 1: Meat+RT   | 53                  | 0                                                             | 0             | 5                      | 5         | 0                                                      | 2             | 0                      | 2         | 0                                                          | 0                      | 0         |
|                                                 | Gr 2: CHO+RT    | 47                  | 0                                                             | 0             | 4                      | 4         | 0                                                      | 2             | 0                      | 2         | 0                                                          | 0                      | 0         |
| de Azevedo<br>Bach 2022 [15]                    | Gr 1: WP+RT     | 18                  | 0                                                             | 3             | 0                      | 3         | 0                                                      | 0             | 0                      | 0         | 0                                                          | 0                      | 0         |
|                                                 | Gr 2: PLA+RT    | 18                  | 1                                                             | 1             | 0                      | 2         | 0                                                      | 0             | 0                      | 0         | 0                                                          | 0                      | 0         |
| de Carvalho<br>Bastone<br>2020 [16]             | Gr 1: WP+RT     | 20                  | 0                                                             | 0             | 4                      | 4         | NR                                                     | NR            | NR                     |           | NR                                                         | NR                     |           |
|                                                 | Gr 2: RT        | 20                  |                                                               | 0             | 3                      | 3         |                                                        | NR            | NR                     |           | NR                                                         | NR                     |           |
|                                                 | Gr 3: WP        | 20                  | 0                                                             |               | 2                      | 2         | NR                                                     |               | NR                     |           | NR                                                         | NR                     |           |
|                                                 | Gr 4: RC        | 20                  |                                                               |               | 2                      | 2         |                                                        |               | NR                     |           | NR                                                         | NR                     |           |
| Deer 2019 [17]                                  | Gr 1: WP+RT     | 20                  | 0                                                             | 0             | 4                      | 4         | NR                                                     | NR            | NR                     |           | NR                                                         | NR                     |           |
|                                                 | Gr 2: PLA+RT    | 21                  | 0                                                             | 0             | 4                      | 4         | NR                                                     | NR            | NR                     |           | NR                                                         | NR                     |           |
|                                                 | Gr 3: WP        | 20                  | 0                                                             |               | 5                      | 5         | NR                                                     |               | NR                     |           | NR                                                         | NR                     |           |
|                                                 | Gr 4: PLA       | 20                  | 0                                                             |               | 7                      | 7         | NR                                                     |               | NR                     |           | NR                                                         | NR                     |           |

|                                      |                    |    |   |   |    |    |    |    |    |   |    |    |    |
|--------------------------------------|--------------------|----|---|---|----|----|----|----|----|---|----|----|----|
| Deibert 2011 [18]                    | Gr 1: SP+RT        | 14 | 0 | 0 | 1  | 1  | NR | NR | NR |   | NR | NR |    |
|                                      | Gr 2: RT           | 14 |   | 0 | 1  | 1  |    | NR | NR |   | NR | NR |    |
|                                      | Gr 3: RC           | 12 |   |   | 3  | 3  |    |    | NR |   | NR | NR |    |
| Duff 2014 [19]                       | Gr 1: MP+RT        | 19 | 0 | 0 | 0  | 0  | 2  | 0  | 0  | 2 | 0  | 0  | 0  |
|                                      | Gr 2: WP+RT        | 21 | 0 | 0 | 1  | 1  | 3  | 0  | 0  | 3 | 0  | 0  | 0  |
| Dulac 2021 [20]                      | Gr 1: WP+RT        | 25 | 0 | 0 | 4  | 4  | 0  | 0  | 0  | 0 | 0  | 0  | 0  |
|                                      | Gr 2: Casein+RT    | 25 | 0 | 0 | 5  | 5  | 0  | 0  | 0  | 0 | 0  | 0  | 0  |
|                                      | Gr 3: PLA+RT       | 25 | 0 | 0 | 6  | 6  | 0  | 0  | 0  | 0 | 0  | 0  | 0  |
| Eliot 2008 [21];<br>Bemben 2010 [22] | Gr 1: WP+Cre+RT    | 11 | 0 | 0 | 0  | 0  | 0  | 0  | 0  | 0 | 0  | 0  | 0  |
|                                      | Gr 2: WP+RT        | 11 | 0 | 0 | 0  | 0  | 0  | 0  | 0  | 0 | 0  | 0  | 0  |
|                                      | Gr 3: Cre+RT       | 10 | 0 | 0 | 0  | 0  | 0  | 0  | 0  | 0 | 0  | 0  | 0  |
|                                      | Gr 4: PLA+RT       | 10 | 0 | 0 | 0  | 0  | 0  | 0  | 0  | 0 | 0  | 0  | 0  |
| Fiatarone 1994 [23]                  | Gr 1: SP+RT        | 25 | 0 | 0 | 1  | 1  | 1  | 1  | 0  | 2 | 0  | 0  | 0  |
|                                      | Gr 2: PLA+RT       | 25 | 0 | 1 | 1  | 2  | 0  | 2  | 1  | 3 | 0  | 0  | 0  |
|                                      | Gr 3: SP           | 24 | 0 |   | 2  | 2  | 1  |    | 0  | 1 | 0  | 0  | 0  |
|                                      | Gr 4: PLA          | 26 | 0 |   | 1  | 1  | 0  |    | 0  | 0 | 0  | 0  | 0  |
| Formica 2020 [24]                    | Gr 1: Meat+RT      | 77 | 0 | 0 | 4  | 4  | 0  | 6  | 0  | 6 | 0  | 0  | 0  |
|                                      | Gr 2: RT           | 77 |   | 0 | 5  | 5  |    | 7  | 0  | 7 | 0  | 0  | 0  |
| Francis 2017 [25]                    | Gr 1: MP+RT        | 29 | 7 | 0 | 13 | 20 | NR | NR | NR |   | NR | NR |    |
|                                      | Gr 2: MP           | 28 | 9 |   | 13 | 22 | NR |    | NR |   | NR | NR |    |
| Gade 2019 [26]                       | Gr 1: MP+RT        | 83 | 0 | 2 | 3  | 5  | 0  | 0  | 0  | 0 | 0  | 0  | 0  |
|                                      | Gr 2: PLA+RT       | 82 | 0 | 1 | 4  | 5  | 0  | 0  | 0  | 0 | 0  | 0  | 0  |
| Granic 2020 [27]                     | Gr 1: Whole-MP+RT  | 10 | 0 | 0 | 1  | 1  | 0  | 0  | 0  | 0 | 0  | 0  | 0  |
|                                      | Gr 2: Skimmed-MP+I | 10 | 0 | 0 | 0  | 0  | 0  | 0  | 0  | 0 | 0  | 0  | 0  |
|                                      | Gr 3: CHO+RT       | 10 | 0 | 0 | 0  | 0  | 0  | 0  | 0  | 0 | 0  | 0  | 0  |
| Griffen 2022 [28]                    | Gr 1: WP+RT        | 9  | 0 | 0 | 0  | 0  | 0  | 0  | 0  | 0 | 0  | 0  | 0  |
|                                      | Gr 2: PLA+RT       | 10 | 0 | 0 | 1  | 1  | 0  | 1  | 0  | 1 | 0  | 0  | 0  |
|                                      | Gr 3: WP           | 10 | 0 |   | 1  | 1  | 0  |    | 0  | 0 | 0  | 0  | 0  |
|                                      | Gr 4: PLA          | 10 | 0 |   | 1  | 1  | 0  |    | 0  | 0 | 0  | 0  | 0  |
| Gronstedt<br>2020 [29]               | Gr 1: MP+RT        | 60 | 0 | 0 | 8  | 8  | 3  | 0  | 0  | 3 | 0  | 11 | 11 |
|                                      | Gr 2: RT           | 60 |   | 0 | 10 | 10 |    | 1  | 0  | 1 | 0  | 13 | 13 |
| Hamarsland<br>2019 [30]              | Gr 1: MP+RT        | 19 | 0 | 0 | 4  | 4  | NR | NR | NR |   | NR | NR |    |
|                                      | Gr 2: WP+RT        | 19 | 0 | 0 | 4  | 4  | NR | NR | NR |   | NR | NR |    |
| Haß 2022 [31]                        | Gr 1: WP+Omega-3+  | 28 | 2 | 0 | 5  | 7  | NR | NR | NR |   | NR | NR |    |
|                                      | Gr 2: WP+RT        | 27 | 2 | 0 | 5  | 7  | NR | NR | NR |   | NR | NR |    |
|                                      | Gr 3: RT           | 22 |   | 0 | 2  | 2  |    | NR | NR |   | NR | NR |    |
| Haub<br>2002 [32];<br>2005 [33]      | Gr 1: Meat+RT      | 13 | 0 | 1 | 2  | 3  | 0  | 1  | 0  | 1 | NR | NR |    |
|                                      | Gr 2: SP+RT        | 13 | 0 | 0 | 2  | 2  | 0  | 0  | 1  | 1 | NR | NR |    |
| He 2022 [34]                         | Gr 1: WP+RT        | 75 | 0 | 0 | 0  | 0  | NR | NR | NR |   | NR | NR |    |
|                                      | Gr 2: RC           | 75 |   |   | 0  | 0  |    |    | NR |   | NR | NR |    |
| Holm 2008 [35]                       | Gr 1: WP+RT        | 13 | 0 | 0 | 5  | 5  | NR | NR | NR |   | NR | NR |    |
|                                      | Gr 2: PLA+RT       | 16 | 0 | 0 | 4  | 4  | NR | NR | NR |   | NR | NR |    |
| Holwerda 2018 [36]                   | Gr 1: WP+RT        | 22 | 0 | 1 | 0  | 1  | 0  | 1  | 0  | 1 | 0  | 0  | 0  |
|                                      | Gr 2: PLA+RT       | 22 | 0 | 2 | 0  | 2  | 0  | 1  | 0  | 1 | 0  | 0  | 0  |
| Kang 2020 [37]                       | Gr 1: MP+RT        | 60 | 0 | 0 | 6  | 6  | 1  | 0  | 2  | 3 | 0  | 0  | 0  |



|                                    |                 |     |   |   |    |    |    |    |    |    |    |    |   |
|------------------------------------|-----------------|-----|---|---|----|----|----|----|----|----|----|----|---|
| Karelis 2015 [38]                  | Gr 2: PLA+RT    | 60  | 0 | 2 | 3  | 5  | 0  | 0  | 0  | 0  | 0  | 0  | 0 |
|                                    | Gr 1: WP+RT     | 49  | 1 | 3 | 4  | 8  | 1  | 2  | 0  | 3  | 0  | 0  | 0 |
|                                    | Gr 2: Casein+RT | 50  | 1 | 2 | 4  | 7  | 1  | 1  | 0  | 2  | 0  | 0  | 0 |
| Kemmler 2020a [39];<br>2020b [40]  | Gr 1: WP+RT     | 21  | 0 | 0 | 2  | 2  | NR | NR | NR |    | NR | NR |   |
|                                    | Gr 2: WP        | 22  | 0 |   | 2  | 2  | NR |    | NR |    | NR | NR |   |
| Krause 2019 [41]                   | Gr 1: WP+RT     | 11  | 0 | 0 | 0  | 0  | NR | NR | NR |    | NR | NR |   |
|                                    | Gr 2: PLA+RT    | 10  | 0 | 0 | 0  | 0  | NR | NR | NR |    | NR | NR |   |
|                                    | Gr 3: WP        | 7   | 0 |   | 0  | 0  | NR |    | NR |    | NR | NR |   |
|                                    | Gr 4: PLA       | 10  | 0 |   | 0  | 0  | NR |    | NR |    | NR | NR |   |
| Kukuljan 2009a [42];<br>2009b [43] | Gr 1: MP+RT     | 45  | 0 | 0 | 1  | 1  | 0  | 5  | 0  | 5  | 0  | 0  | 0 |
|                                    | Gr 2: RT        | 46  |   | 0 | 1  | 1  |    | 5  | 0  | 5  | 0  | 0  | 0 |
|                                    | Gr 3: MP        | 45  | 0 |   | 1  | 1  | 0  |    | 0  | 0  | 0  | 0  | 0 |
|                                    | Gr 4: RC        | 44  |   |   | 2  | 2  |    |    | 0  | 0  | 0  | 0  | 0 |
| Kwon 2015 [44]                     | Gr 1: Meat+RT   | 30  | 0 | 0 | 4  | 4  | NR | NR | NR |    | NR | NR |   |
|                                    | Gr 2: RT        | 28  |   | 0 | 3  | 3  |    | NR | NR |    | NR | NR |   |
|                                    | Gr 3: RC        | 31  |   |   | 3  | 3  |    |    | NR |    | NR | NR |   |
| Lamb 2020 [45]                     | Gr 1: Peanut+RT | 22  | 0 | 1 | 1  | 2  | NR | NR | NR |    | NR | NR |   |
|                                    | Gr 2: RT        | 19  |   | 0 | 0  | 0  |    | NR | NR |    | NR | NR |   |
| Leenders 2013 [46]                 | Gr 1: MP+RT     | 30  | 0 | 0 | 3  | 3  | NR | NR | NR |    | NR | NR |   |
|                                    | Gr 2: PLA+RT    | 30  | 0 | 0 | 4  | 4  | NR | NR | NR |    | NR | NR |   |
| Liao 2021 [47]                     | Gr 1: WP+RT     | 36  | 0 | 0 | 1  | 1  | 0  | 0  | 0  | 0  | 0  | 0  | 0 |
|                                    | Gr 2: RT        | 36  |   | 0 | 2  | 2  |    | 0  | 0  | 0  | 0  | 0  | 0 |
| Maesta 2007 [48]                   | Gr 1: SP+RT     | 15  | 1 | 0 | 0  | 1  | 1  | 0  | 0  | 1  | 0  | 0  | 0 |
|                                    | Gr 2: PLA+RT    | 15  | 2 | 0 | 2  | 4  | 2  | 0  | 0  | 2  | 0  | 0  | 0 |
|                                    | Gr 3: SP        | 15  | 3 |   | 2  | 5  | 3  |    | 0  | 3  | 0  | 0  | 0 |
|                                    | Gr 4: PLA       | 15  | 3 |   | 1  | 4  | 3  |    | 0  | 3  | 0  | 0  | 0 |
| McKenna 2021 [49]                  | Gr 1: Meat+RT   | 28  | 0 | 0 | 7  | 7  | NR | NR | NR |    | NR | NR |   |
|                                    | Gr 2: RT        | 22  |   | 1 | 3  | 4  |    | NR | NR |    | NR | NR |   |
| Mertz 2021 [50]                    | Gr 1: WP+RT     | 72  | 0 | 0 | 10 | 10 | NR | NR | NR |    | NR | NR |   |
|                                    | Gr 2: WP        | 50  | 0 |   | 6  | 6  | NR |    | NR |    | NR | NR |   |
|                                    | Gr 3: PLA       | 36  | 0 |   | 2  | 2  | NR |    | NR |    | NR | NR |   |
| Miller 2021 [51]                   | Gr 1: WP+RT     | 98  | 0 | 1 | 10 | 11 | 35 | 11 | 0  | 46 | 0  | 0  | 0 |
|                                    | Gr 2: RT        | 100 |   | 3 | 17 | 20 |    | 12 | 0  | 12 | 0  | 0  | 0 |
| Mitchell 2018 [52]                 | Gr 1: MP+RT     | 15  | 0 | 0 | 0  | 0  | NR | NR | NR |    | NR | NR |   |
|                                    | Gr 2: PLA+RT    | 15  | 0 | 0 | 0  | 0  | NR | NR | NR |    | NR | NR |   |
| Molnar 2016 [53]                   | Gr 1: WP+RT     | 17  | 0 | 0 | 0  | 0  | NR | NR | NR |    | NR | NR |   |
|                                    | Gr 2: RT        | 17  |   | 0 | 0  | 0  |    | NR | NR |    | NR | NR |   |
| Mori 2018 [54]                     | Gr 1: WP+RT     | 27  | 1 | 0 | 3  | 4  | NR | NR | NR |    | NR | NR |   |
|                                    | Gr 2: RT        | 27  |   | 0 | 4  | 4  |    | NR | NR |    | NR | NR |   |
|                                    | Gr 3: WP        | 27  | 1 |   | 2  | 3  | NR |    | NR |    | NR | NR |   |
| Mori 2022 [55]                     | Gr 1: WP+RT     | 27  | 0 | 0 | 2  | 2  | NR | NR | NR |    | NR | NR |   |
|                                    | Gr 2: RT        | 27  |   | 0 | 2  | 2  |    | NR | NR |    | NR | NR |   |
|                                    | Gr 3: WP        | 27  | 0 |   | 2  | 2  | NR |    | NR |    | NR | NR |   |
| Nabuco 2018 [56];                  | Gr 1: WP+RT     | 47  | 0 | 0 | 4  | 4  | NR | NR | NR |    | NR | NR |   |
|                                    | Gr 2: PLA+RT    | 23  | 0 | 0 | 0  | 0  | NR | NR | NR |    | NR | NR |   |

|                           |                 |     |    |    |    |    |    |    |    |    |   |    |    |
|---------------------------|-----------------|-----|----|----|----|----|----|----|----|----|---|----|----|
| 2019a [57]                |                 |     |    |    |    |    |    |    |    |    |   |    |    |
| Nabuco 2019b [58]         | Gr 1: WP+RT     | 13  | 0  | 0  | 0  | 0  | NR | NR | NR |    |   | NR | NR |
|                           | Gr 2: PLA+RT    | 13  | 0  | 0  | 0  | 0  | NR | NR | NR |    |   | NR | NR |
| Nabuco 2019c [59]         | Gr 1: WP+RT     | 15  | 0  | 0  | 0  | 0  | NR | NR | NR |    |   | NR | NR |
|                           | Gr 2: PLA+RT    | 15  | 0  | 0  | 0  | 0  | NR | NR | NR |    |   | NR | NR |
| Nilsson 2020 [60]         | Gr 1: MP+RT     | 22  | 0  | 0  | 6  | 6  | NR | NR | NR |    |   | NR | NR |
|                           | Gr 2: PLA+RT    | 23  | 0  | 0  | 7  | 7  | NR | NR | NR |    |   | NR | NR |
| Oesen 2015 [61]           | Gr 1: WP+RT     | 36  | 0  | 0  | 11 | 11 | 0  | 0  | 0  | 0  | 0 | 0  | 0  |
|                           | Gr 2: RT        | 41  |    | 0  | 10 | 10 |    | 0  | 0  | 0  | 0 | 0  | 0  |
|                           | Gr 3: RC        | 40  |    |    | 14 | 14 |    |    | 0  | 0  | 0 | 0  | 0  |
| Orsatti 2018 [62]         | Gr 1: SP+RT     | 21  | 0  | 2  | 3  | 5  | 0  | 0  | 0  | 0  | 0 | 0  | 0  |
|                           | Gr 2: PLA+RT    | 20  | 0  | 2  | 2  | 4  | 0  | 0  | 0  | 0  | 0 | 0  | 0  |
| Roschel 2021 [63]         | Gr 1: WP+RT     | 22  | 0  | 0  | 3  | 3  | NR | NR | NR |    |   | NR | NR |
|                           | Gr 2: SP+RT     | 22  | 0  | 0  | 2  | 2  | NR | NR | NR |    |   | NR | NR |
|                           | Gr 3: PLA+RT    | 22  | 0  | 0  | 1  | 1  | NR | NR | NR |    |   | NR | NR |
| Seino 2018 [64]           | Gr 1: MP+RT     | 41  | 3  | 0  | 0  | 3  | 2  | 0  | 0  | 2  | 0 | 0  | 0  |
|                           | Gr 2: RT        | 41  |    | 0  | 1  | 1  |    | 0  | 0  | 0  | 0 | 0  | 0  |
| Shahar 2013 [65]          | Gr 1: SP+RT     | 17  | 0  | 0  | 2  | 2  | NR | NR | NR |    |   | NR | NR |
|                           | Gr 2: RT        | 21  |    | 0  | 2  | 2  |    | NR | NR |    |   | NR | NR |
|                           | Gr 3: SP        | 18  | 0  |    | 3  | 3  | NR |    | NR |    |   | NR | NR |
|                           | Gr 4: RC        | 19  |    |    | 3  | 3  |    |    | NR |    |   | NR | NR |
| Shenoy 2013 [66]          | Gr 1: SP+RT     | 20  | 0  | 0  | 0  | 0  | NR | NR | NR |    |   | NR | NR |
|                           | Gr 2: SP        | 20  | 0  |    | 0  | 0  | NR |    | NR |    |   | NR | NR |
|                           | Gr 3: RC        | 20  |    |    | 0  | 0  |    |    | NR |    |   | NR | NR |
| Soares 2023 [67]          | Gr 1: WP+RT     | 14  | 0  | 0  | 1  | 1  | NR | NR | NR |    |   | NR | NR |
|                           | Gr 2: PLA+RT    | 14  | 0  | 0  | 1  | 1  | NR | NR | NR |    |   | NR | NR |
| Sugihara Junior 2018 [68] | Gr 1: WP+RT     | 15  | 0  | 0  | 0  | 0  | NR | NR | NR |    |   | NR | NR |
|                           | Gr 2: PLA+RT    | 16  | 0  | 0  | 0  | 0  | NR | NR | NR |    |   | NR | NR |
| Tang 2020 [69]            | Gr 1: WP+RT     | 100 | 0  | 0  | 0  | 0  | NR | NR | NR |    |   | NR | NR |
|                           | Gr 2: RC        | 100 |    |    | 0  | 0  |    |    | NR |    |   | NR | NR |
| Thomson 2016 [70]         | Gr 1: MP+RT     | 61  | 5  | 10 | 12 | 27 | 3  | 13 | 0  | 16 | 0 | 0  | 0  |
|                           | Gr 2: SP+RT     | 64  | 6  | 20 | 12 | 38 | 1  | 13 | 0  | 14 | 0 | 0  | 0  |
|                           | Gr 3: CHO+RT    | 62  | 15 | 13 | 11 | 39 | 4  | 12 | 0  | 16 | 0 | 0  | 0  |
| Tieland 2012 [71];        | Gr 1: MP+RT     | 31  | 0  | 0  | 5  | 5  | NR | NR | NR |    |   | NR | NR |
| Dirks 2017 [72]           | Gr 2: PLA+RT    | 31  | 0  | 0  | 6  | 6  | NR | NR | NR |    |   | NR | NR |
| Trevisan 2010 [73]        | Gr 1: SP+RT     | 15  | 0  | 0  | 0  | 0  | NR | NR | NR |    |   | NR | NR |
|                           | Gr 2: PLA+RT    | 15  | 0  | 0  | 0  | 0  | NR | NR | NR |    |   | NR | NR |
|                           | Gr 3: SP        | 15  | 0  |    | 0  | 0  | NR |    | NR |    |   | NR | NR |
|                           | Gr 4: PLA       | 15  | 0  |    | 0  | 0  | NR |    | NR |    |   | NR | NR |
| Unterberger 2022 [74]     | Gr 1: SP+RT     | 48  | 0  | 0  | 9  | 9  | 0  | 0  | 0  | 0  | 0 | 0  | 0  |
|                           | Gr 2: PLA+RT    | 41  | 0  | 0  | 5  | 5  | 0  | 0  | 0  | 0  | 0 | 0  | 0  |
|                           | Gr 3: RC        | 47  |    |    | 6  | 6  |    |    | 0  | 0  | 0 | 0  | 0  |
| Verdijk 2009 [75]         | Gr 1: Casein+RT | 14  | 0  | 0  | 1  | 1  | NR | NR | NR |    |   | NR | NR |
|                           | Gr 2: PLA+RT    | 14  | 0  | 0  | 1  | 1  | NR | NR | NR |    |   | NR | NR |
| Verreijen 2015 [76]       | Gr 1: WP+RT     | 40  | 0  | 3  | 5  | 8  | 0  | 3  | 0  | 3  | 0 | 0  | 0  |
|                           | Gr 2: PLA+RT    | 40  | 0  | 3  | 4  | 7  | 0  | 3  | 0  | 3  | 0 | 0  | 0  |

|                         |              |    |   |   |    |    |    |    |    |                |    |    |                 |
|-------------------------|--------------|----|---|---|----|----|----|----|----|----------------|----|----|-----------------|
| Vijayakumaran 2023 [77] | Gr 1: WP+RT  | 8  | 0 | 0 | 0  | 0  | 0  | 0  | 0  | 0              | 0  | 0  | 0               |
|                         | Gr 2: RT     | 8  |   | 0 | 0  | 0  |    | 0  | 0  | 0              | 0  | 0  | 0               |
| Vikberg 2019 [78]       | Gr 1: MP+RT  | 36 | 0 | 0 | 5  | 5  | 0  | 4  | 1  | 5              | 0  | 0  | 0               |
|                         | Gr 2: RC     | 34 |   |   | 1  | 1  |    |    | 0  | 0              | 0  | 0  | 0               |
| Villanueva 2014 [79]    | Gr 1: WP+RT  | 8  | 0 | 0 | 1  | 1  | 0  | 0  | 0  | 0              | 0  | 0  | 0               |
|                         | Gr 2: RT     | 8  |   | 0 | 1  | 1  |    | 0  | 0  | 0              | 0  | 0  | 0               |
|                         | Gr 3: RC     | 9  |   |   | 1  | 1  |    |    | 0  | 0              | 0  | 0  | 0               |
| Weisgarber 2015 [80]    | Gr 1: WP+RT  | 17 | 0 | 0 | 2  | 2  | 0  | 0  | 0  | 0              | 0  | 0  | 0               |
|                         | Gr 2: PLA+RT | 17 | 0 | 0 | 3  | 3  | 0  | 0  | 0  | 0              | 0  | 0  | 0               |
| Yamada 2019 [81]        | Gr 1: WP+RT  | 28 | 2 | 2 | 2  | 6  | 0  | 0  | 0  | 0              | 0  | 0  | 0               |
|                         | Gr 2: RT     | 28 |   | 2 | 2  | 4  |    | 0  | 0  | 0              | 0  | 0  | 0               |
|                         | Gr 3: WP     | 28 | 4 |   | 2  | 6  | 0  |    | 0  | 0              | 0  | 0  | 0               |
|                         | Gr 4: RC     | 28 |   |   | 2  | 2  |    |    | 0  | 0              | 0  | 0  | 0               |
| Zdzieblik 2021 [82]     | Gr 1: WP+RT  | 36 | 0 | 4 | 0  | 4  | 0  | 0  | 0  | 0              | 0  | 0  | 0               |
|                         | Gr 2: PLA+RT | 31 | 0 | 9 | 0  | 9  | 0  | 0  | 0  | 0              | 0  | 0  | 0               |
| Zhao 2022 [83]          | Gr 1: WP+RT  | 20 | 0 | 0 | 0  | 0  | NR | NR | NR |                | NR | NR |                 |
|                         | Gr 2: WP     | 20 | 0 |   |    | 0  | NR |    | NR |                | NR | NR |                 |
|                         | Gr 3: RC     | 20 |   |   | 0  | 0  |    |    | NR |                | NR | NR |                 |
| Zhu 2019 [84]           | Gr 1: SP+RT  | 36 | 0 | 0 | 8  | 8  |    |    |    | 4 <sup>c</sup> |    |    | 12 <sup>c</sup> |
|                         | Gr 2: RT     | 40 |   | 0 | 16 | 16 |    |    |    |                |    |    |                 |
|                         | Gr 3: RC     | 37 |   |   | 13 | 13 |    |    |    |                |    |    |                 |
| Maltais 2016 [85]       | Gr 1: MP+RT  | 10 | 0 | 0 | 2  | 2  | NR | NR | NR |                | NR | NR |                 |
|                         | Gr 2: SP+RT  | 10 | 0 | 0 | 2  | 2  | NR | NR | NR |                | NR | NR |                 |
|                         | Gr 3: PLA+RT | 10 | 0 | 0 | 0  | 0  | NR | NR | NR |                | NR | NR |                 |

<sup>a</sup>The number denotes the citation of the indicated reference at the end of table.

<sup>b</sup>The reported events include cardiovascular onsets, fall injury, death, and other illness requiring inpatient hospitalization.

<sup>c</sup>Total number of participants in study.

CHO, carbohydrates; Cre, creatine; MP, milk protein; NR, not report; PLA, placebo; PS, protein supplementation; RT, resistance training; SP, soy protein; WP, whey protein RC, regular care.

## References of supplementary Table S11

1. Aas SN, Seynnes O, Benestad HB, Raastad T: Strength training and protein supplementation improve muscle mass, strength, and function in mobility-limited older adults: a randomized controlled trial. *Aging Clin Exp Res* **2019**.
2. Amasene M, Besga A, Echeverria I, Urquiza M, Ruiz JR, Rodriguez-Larrad A, Aldamiz M, Anaut P, Irazusta J, Labayen I: Effects of Leucine-Enriched Whey Protein Supplementation on Physical Function in Post-Hospitalized Older Adults Participating in 12-Weeks of Resistance Training Program: A Randomized Controlled Trial. *Nutrients* **2019**, *11*.
3. Amasene M, Cadenas-Sanchez C, Echeverria I, Sanz B, Alonso C, Tobalina I, Irazusta J, Labayen I, Besga A: Effects of Resistance Training Intervention along with Leucine-Enriched Whey Protein Supplementation on Sarcopenia and Frailty in Post-Hospitalized Older Adults: Preliminary Findings of a Randomized Controlled Trial. *J Clin Med* **2021**, *11*.
4. Arciero PJ, Baur D, Connelly S, Ormsbee MJ: Timed-daily ingestion of whey protein and exercise training reduces visceral adipose tissue mass and improves insulin resistance: the PRISE

study. *Journal of applied physiology (Bethesda, Md : 1985)* **2014**, 117:1-10.

5. Arnarson A, Gudny Geirsdottir O, Ramel A, Briem K, Jonsson PV, Thorsdottir I: Effects of whey proteins and carbohydrates on the efficacy of resistance training in elderly people: Double blind, randomised controlled trial. *Eur J Clin Nutr* **2013**, 67:821-826.
6. Bagheri R, Hooshmand Moghadam B, Candow DG, Elliott BT, Wong A, Ashtary-Larky D, Forbes SC, Rashidlamir A: Effects of Icelandic yogurt consumption and resistance training in healthy untrained older males. *Br J Nutr* **2022**, 127:1334-1342.
7. Bijeh N, Mohammadnia-Ahmadi M, Hooshamnd-Moghadam B, Eskandari M, Golestani F: Effects of Soy Milk in Conjunction With Resistance Training on Physical Performance and Skeletal Muscle Regulatory Markers in Older Men. *Biol Res Nurs* **2022**, 24:294-307.
8. Candow DG, Chilibeck PD, Facci M, Abeysekara S, Zello GA: Protein supplementation before and after resistance training in older men. *Eur J Appl Physiol* **2006**, 97:548-556.
9. Candow DG, Little JP, Chilibeck PD, Abeysekara S, Zello GA, Kazachkov M, Cornish SM, Yu PH: Low-dose creatine combined with protein during resistance training in older men. *Med Sci Sports Exerc* **2008**, 40:1645-1652.
10. Chale A, Cloutier GJ, Hau C, Phillips EM, Dallal GE, Fielding RA: Efficacy of whey protein supplementation on resistance exercise-induced changes in lean mass, muscle strength, and physical function in mobility-limited older adults. *The journals of gerontology Series A, Biological sciences and medical sciences* **2013**, 68:682-690.
11. Chang YM: Effects of resistance training combined with nutritional intervention on alleviating sarcopenia in the elderly. *Electron J Practical Clin Nurs Sci* **2019**, 4:48-50.
12. Chen S, Sheng YL, Qi T, Sheng XM, Jin XW: Effects of fortified nutrition combining with resistance exercise on physical function and activity of daily living for elderly patients with sarcopenia. *J Nurs Sci* **2017**, 32:8-10.
13. Colonetti T, Grande AJ, da Rocha FR, Ronconi Dondossola E, Tuon L, Gomes Batista Teles H, Minotto Bom B, Colonetti L, da Rosa MI: Whey protein and vitamin D supplementation in institutionalized older adults: A randomized trial. *Nutr Health* **2023**, 29:129-138.
14. Daly RM, O'Connell SL, Mundell NL, Grimes CA, Dunstan DW, Nowson CA: Protein-enriched diet, with the use of lean red meat, combined with progressive resistance training enhances lean tissue mass and muscle strength and reduces circulating IL-6 concentrations in elderly women: a cluster randomized controlled trial. *Am J Clin Nutr* **2014**, 99:899-910.
15. de Azevedo Bach S, Radaelli R, Beck Schemes M, Neske R, Garbelotto C, Roschel H, Silveira Pinto R, Dornelles Schneider C: Can supplemental protein to low-protein containing meals superimpose on resistance-training muscle adaptations in older adults? A randomized clinical trial. *Exp Gerontol* **2022**, 162:111760.
16. de Carvalho Bastone A, Nobre LN, de Souza Moreira B, Rosa IF, Ferreira GB, Santos DDL, Monteiro N, Alves MD, Gandra RA, de Lira EM: Independent and combined effect of home-based progressive resistance training and nutritional supplementation on muscle strength, muscle mass and physical function in dynapenic older adults with low protein intake: A randomized controlled trial. *Arch Gerontol Geriatr* **2020**, 89:104098.
17. Deer RR, Dickinson JM, Baillargeon J, Fisher SR, Raji M, Volpi E: A Phase I Randomized Clinical Trial of Evidence-Based, Pragmatic Interventions to Improve Functional Recovery After

Hospitalization in Geriatric Patients. *J Gerontol A Biol Sci Med Sci* **2019**, *74*:1628-1636.

18. Deibert P, Solleder F, König D, Vitolins MZ, Dickhuth HH, Gollhofer A, Berg A: Soy protein based supplementation supports metabolic effects of resistance training in previously untrained middle aged males. *Aging Male* **2011**, *14*:273-279.
19. Duff WR, Chilibeck PD, Rooke JJ, Kaviani M, Krentz JR, Haines DM: The effect of bovine colostrum supplementation in older adults during resistance training. *Int J Sport Nutr Exerc Metab* **2014**, *24*:276-285.
20. Dulac MC, Pion CH, Lemieux FC, Pinheiro Carvalho L, El Hajj Boutros G, Bélanger M, Gaudreau P, Chevalier S, Morais JA, Noirez P, et al: Effects of slow- v. fast-digested protein supplementation combined with mixed power training on muscle function and functional capacities in older men. *Br J Nutr* **2021**, *125*:1017-1033.
21. Eliot KA, Knehans AW, Bemben DA, Witten MS, Carter J, Bemben MG: The effects of creatine and whey protein supplementation on body composition in men aged 48 to 72 years during resistance training. *Journal of Nutrition, Health and Aging* **2008**, *12*:208-212.
22. Bemben MG, Witten MS, Carter JM, Eliot KA, Knehans AW, Bemben DA: The effects of supplementation with creatine and protein on muscle strength following a traditional resistance training program in middle-aged and older men. *J Nutr Health Aging* **2010**, *14*:155-159.
23. Fiatarone MA, O'Neill EF, Ryan ND, Clements KM, Solares GR, Nelson ME, Roberts SB, Kehayias JJ, Lipsitz LA, Evans WJ: Exercise Training and Nutritional Supplementation for Physical Frailty in Very Elderly People. *New England J Med* **1994**, *330*:1769-1775.
24. Formica MB, Gianoudis J, Nowson CA, O'Connell SL, Milte C, Ellis KA, Daly RM: Effect of lean red meat combined with a multicomponent exercise program on muscle and cognitive function in older adults: a 6-month randomized controlled trial. *Am J Clin Nutr* **2020**, *112*:113-128.
25. Francis P, Mc Cormack W, Toomey C, Norton C, Saunders J, Kerin E, Lyons M, Jakeman P: Twelve weeks' progressive resistance training combined with protein supplementation beyond habitual intakes increases upper leg lean tissue mass, muscle strength and extended gait speed in healthy older women. *Biogerontology* **2017**, *18*:881-891.
26. Gade J, Beck AM, Andersen HE, Christensen B, Rønholt F, Klausen TW, Vinther A, Astrup A: Protein supplementation combined with low-intensity resistance training in geriatric medical patients during and after hospitalisation: a randomised, double-blind, multicentre trial. *Br J Nutr* **2019**, *122*:1006-1020.
27. Granic A, Hurst C, Dismore L, Stevenson E, Sayer AA, Aspray T: Feasibility and acceptability of a milk and resistance exercise intervention to improve muscle function in community-dwelling older adults (MilkMAN): Pilot study. *PLoS One* **2020**, *15*:e0235952.
28. Griffen C, Duncan M, Hattersley J, Weickert MO, Dallaway A, Renshaw D: Effects of resistance exercise and whey protein supplementation on skeletal muscle strength, mass, physical function, and hormonal and inflammatory biomarkers in healthy active older men: a randomised, double-blind, placebo-controlled trial. *Exp Gerontol* **2022**, *158*:111651.
29. Gronstedt H, Vikstrom S, Cederholm T, Franzen E, Luiking YC, Seiger A, Wimo A, Faxen-Irving G, Bostrom AM: Effect of Sit-to-Stand Exercises Combined With Protein-Rich Oral Supplementation in Older Persons: The Older Person's Exercise and Nutrition Study. *J Am Med Dir Assoc* **2020**, *21*:1229-1237.

30. Hamarsland H, Johansen MK, Seeberg F, Brochmann M, Garthe I, Benestad HB, Raastad T: Native Whey Induces Similar Adaptation to Strength Training as Milk, despite Higher Levels of Leucine, in Elderly Individuals. *Nutrients* **2019**, *11*.
31. Haß U, Kochlik B, Herpich C, Rudloff S, Norman K: Effects of an Omega-3 Supplemented, High-Protein Diet in Combination with Vibration and Resistance Exercise on Muscle Power and Inflammation in Old Adults: A Pilot Randomized Controlled Trial. *Nutrients* **2022**, *14*.
32. Haub MD, Wells AM, Tarnopolsky MA, Campbell WW: Effect of protein source on resistive-training-induced changes in body composition and muscle size in older men. *Am J Clin Nutr* **2002**, *76*:511-517.
33. Haub MD, Wells AM, Campbell WW: Beef and soy-based food supplements differentially affect serum lipoprotein-lipid profiles because of changes in carbohydrate intake and novel nutrient intake ratios in older men who resistive-train. *Metabolism* **2005**, *54*:769-774.
34. He LN, Li DM: Observation on the Clinical Effect of Dietary Nutrition Intervention Combined with Anti-resistance Training in Elderly Male Patients with Sarcopenia. *Smart Healthcare* **2022**, *8*:44-47.
35. Holm L, Olesen JL, Matsumoto K, Doi T, Mizuno M, Alsted TJ, Mackey AL, Schwarz P, Kjaer M: Protein-containing nutrient supplementation following strength training enhances the effect on muscle mass, strength, and bone formation in postmenopausal women. *J Appl Physiol (1985)* **2008**, *105*:274-281.
36. Holwerda AM, Overkamp M, Paulussen KJM, Smeets JSJ, van Kranenburg J, Backx EMP, Gijzen AP, Goessens JPB, Verdijk LB, van Loon LJC: Protein Supplementation after Exercise and before Sleep Does Not Further Augment Muscle Mass and Strength Gains during Resistance Exercise Training in Active Older Men. *J Nutr* **2018**, *148*:1723-1732.
37. Kang Y, Kim N, Choi YJ, Lee Y, Yun J, Park SJ, Park HS, Chung YS, Park YK: Leucine-Enriched Protein Supplementation Increases Lean Body Mass in Healthy Korean Adults Aged 50 Years and Older: A Randomized, Double-Blind, Placebo-Controlled Trial. *Nutrients* **2020**, *12*.
38. Karelis AD, Messier V, Suppère C, Briand P, Rabasa-Lhoret R: Effect of cysteine-rich whey protein (immunocal(R)) supplementation in combination with resistance training on muscle strength and lean body mass in non-frail elderly subjects: a randomized, double-blind controlled study. *J Nutr Health Aging* **2015**, *19*:531-536.
39. Kemmler W, Kohl M, Fröhlich M, Jakob F, Engelke K, von Stengel S, Schoene D: Effects of High-Intensity Resistance Training on Osteopenia and Sarcopenia Parameters in Older Men with Osteosarcopenia-One-Year Results of the Randomized Controlled Franconian Osteopenia and Sarcopenia Trial (FrOST). *J Bone Miner Res* **2020**, *35*:1634-1644.
40. Kemmler W, Kohl M, Jakob F, Engelke K, von Stengel S: Effects of High Intensity Dynamic Resistance Exercise and Whey Protein Supplements on Osteosarcopenia in Older Men with Low Bone and Muscle Mass. Final Results of the Randomized Controlled FrOST Study. *Nutrients* **2020**, *12*.
41. Krause M, Crognale D, Cogan KE, Contarelli S, Egan B, Newsholme P, De Vito G: The effects of a combined bodyweight-based and elastic bands resistance training, with or without protein supplementation, on muscle mass, signaling and heat shock response in healthy older people. *Exp Gerontol* **2019**, *115*:104-113.
42. Kukuljan S, Nowson CA, Bass SL, Sanders K, Nicholson GC, Seibel MJ, Salmon J, Daly RM: Effects of a multi-component exercise program and calcium-vitamin-D3-fortified milk on bone

mineral density in older men: a randomised controlled trial. *Osteoporos Int* **2009**, *20*:1241-1251.

43. Kukuljan S, Nowson CA, Sanders K, Daly RM: Effects of resistance exercise and fortified milk on skeletal muscle mass, muscle size, and functional performance in middle-aged and older men: an 18-mo randomized controlled trial. *J Appl Physiol (1985)* **2009**, *107*:1864-1873.
44. Kwon J, Yoshida Y, Yoshida H, Kim H, Suzuki T, Lee Y: Effects of a combined physical training and nutrition intervention on physical performance and health-related quality of life in prefrail older women living in the community: a randomized controlled trial. *J Am Med Dir Assoc* **2015**, *16*:263.e261-268.
45. Lamb DA, Moore JH, Smith MA, Vann CG, Osburn SC, Ruple BA, Fox CD, Smith KS, Altonji OM, Power ZM, et al: The effects of resistance training with or without peanut protein supplementation on skeletal muscle and strength adaptations in older individuals. *J Int Soc Sports Nutr* **2020**, *17*:66.
46. Leenders M, Verdijk LB, Van der Hoeven L, Van Kranenburg J, Nilwik R, Wodzig WK, Senden JM, Keizer HA, Van Loon LJ: Protein supplementation during resistance-type exercise training in the elderly. *Med Sci Sports Exerc* **2013**, *45*:542-552.
47. Liao CD, Liao YH, Liou TH, Hsieh CY, Kuo YC, Chen HC: Effects of Protein-Rich Nutritional Composition Supplementation on Sarcopenia Indices and Physical Activity during Resistance Exercise Training in Older Women with Knee Osteoarthritis. *Nutrients* **2021**, *13*:2487.
48. Maesta N, Nahas EA, Nahas-Neto J, Orsatti FL, Fernandes CE, Traiman P, Burini RC: Effects of soy protein and resistance exercise on body composition and blood lipids in postmenopausal women. *Maturitas* **2007**, *56*:350-358.
49. McKenna CF, Salvador AF, Hughes RL, Scaroni SE, Alamilla RA, Askow AT, Paluska SA, Dilger AC, Holscher HD, De Lisio M: Higher protein intake during resistance training does not potentiate strength, but modulates gut microbiota, in middle-aged adults: a randomized control trial. *Am J Physiology-Endocrinology and Metabolism* **2021**, *320*:E900-E913.
50. Mertz KH, Reitelseder S, Bechshoeft R, Bulow J, Højfeldt G, Jensen M, Schacht SR, Lind MV, Rasmussen MA, Mikkelsen UR, et al: The effect of daily protein supplementation, with or without resistance training for 1 year, on muscle size, strength, and function in healthy older adults: A randomized controlled trial. *Am J Clin Nutr* **2021**, *113*:790-800.
51. Miller EG, Nowson CA, Dunstan DW, Kerr DA, Menzies D, Daly RM: Effects of whey protein plus vitamin D supplementation combined with progressive resistance training on glycaemic control, body composition, muscle function and cardiometabolic risk factors in middle-aged and older overweight/obese adults with type 2 diabetes: A 24-week randomized controlled trial. *Diabetes Obes Metab* **2021**, *23*:938-949.
52. Mitchell CJ, D'Souza RF, Mitchell SM, Figueiredo VC, Miller BF, Hamilton KL, Peelor FF, 3rd, Coronet M, Pileggi CA, Durainayagam B, et al: Impact of dairy protein during limb immobilization and recovery on muscle size and protein synthesis; a randomized controlled trial. *J Appl Physiol (1985)* **2018**, *124*:717-728.
53. Molnar A, Jonasne Sztruhar I, Csontos AA, Ferencz C, Varbiro S, Szekacs B: Special nutrition intervention is required for muscle protective efficacy of physical exercise in elderly people at highest risk of sarcopenia. *Physiol Int* **2016**, *103*:368-376.
54. Mori H, Tokuda Y: Effect of whey protein supplementation after resistance exercise on the muscle mass and physical function of healthy older women: A randomized controlled trial.

*Geriatr Gerontol Int* **2018**, 18:1398-1404.

55. Mori H, Tokuda Y: De-Training Effects Following Leucine-Enriched Whey Protein Supplementation and Resistance Training in Older Adults with Sarcopenia: A Randomized Controlled Trial with 24 Weeks of Follow-Up. *J Nutr Health Aging* **2022**, 26:994-1002.
56. Nabuco HCG, Tomeleri CM, Sugihara Junior P, Fernandes RR, Cavalcante EF, Antunes M, Ribeiro AS, Teixeira DC, Silva AM, Sardinha LB, Cyrino ES: Effects of Whey Protein Supplementation Pre- or Post-Resistance Training on Muscle Mass, Muscular Strength, and Functional Capacity in Pre-Conditioned Older Women: A Randomized Clinical Trial. *Nutrients* **2018**, 10.
57. Nabuco HCG, Tomeleri CM, Sugihara Junior P, Fernandes RR, Cavalcante EF, Venturini D, Barbosa DS, Silva AM, Sardinha LB, Cyrino ES: Effects of pre- or post-exercise whey protein supplementation on body fat and metabolic and inflammatory profile in pre-conditioned older women: A randomized, double-blind, placebo-controlled trial. *Nutr Metab Cardiovasc Dis* **2019**, 29:290-300.
58. Nabuco HCG, Tomeleri CM, Fernandes RR, Sugihara Junior P, Cavalcante EF, Cunha PM, Antunes M, Nunes JP, Venturini D, Barbosa DS, et al: Effect of whey protein supplementation combined with resistance training on body composition, muscular strength, functional capacity, and plasma-metabolism biomarkers in older women with sarcopenic obesity: A randomized, double-blind, placebo-controlled trial. *Clin Nutr ESPEN* **2019**, 32:88-95.
59. Nabuco HCG, Tomeleri CM, Fernandes RR, Sugihara Junior P, Cavalcante EF, Venturini D, Barbosa DS, Silva AM, Sardinha LB, Cyrino ES: Effects of Protein Intake Beyond Habitual Intakes Associated With Resistance Training on Metabolic Syndrome-Related Parameters, Isokinetic Strength, and Body Composition in Older Women. *J Aging Phys Act* **2019**, 27:545–552.
60. Nilsson MI, Mikhail A, Lan L, Di Carlo A, Hamilton B, Barnard K, Hettinga BP, Hatcher E, Tarnopolsky MG, Nederveen JP, et al: A Five-Ingredient Nutritional Supplement and Home-Based Resistance Exercise Improve Lean Mass and Strength in Free-Living Elderly. *Nutrients* **2020**, 12.
61. Oesen S, Halper B, Hofmann M, Jandrasits W, Franzke B, Strasser EM, Graf A, Tschan H, Bachl N, Quittan M, et al: Effects of elastic band resistance training and nutritional supplementation on physical performance of institutionalised elderly - A randomized controlled trial. *Exp Gerontol* **2015**, 72:99-108.
62. Orsatti FL, Maestá N, de Oliveira EP, Nahas Neto J, Burini RC, Nunes PRP, Souza AP, Martins FM, Nahas EP: Adding Soy Protein to Milk Enhances the Effect of Resistance Training on Muscle Strength in Postmenopausal Women. *J Diet Suppl* **2018**, 15:140-152.
63. Roschel H, Hayashi AP, Fernandes AL, Jambassi-Filho JC, Hevia-Larraín V, de Capitani M, Santana DA, Gonçalves LS, de Sá-Pinto AL, Lima FR, et al: Supplement-based nutritional strategies to tackle frailty: A multifactorial, double-blind, randomized placebo-controlled trial. *Clin Nutr* **2021**, 40:4849-4858.
64. Seino S, Sumi K, Narita M, Yokoyama Y, Ashida K, Kitamura A, Shinkai S: Effects of Low-Dose Dairy Protein Plus Micronutrient Supplementation during Resistance Exercise on Muscle Mass and Physical Performance in Older Adults: A Randomized, Controlled Trial. *J Nutr Health Aging* **2018**, 22:59-67.
65. Shahar S, Kamaruddin NS, Badrasawi M, Sakian NI, Abd Manaf Z, Yassin Z, Joseph L: Effectiveness of exercise and protein supplementation intervention on body composition, functional fitness, and oxidative stress among elderly Malays with sarcopenia. *Clin Interv Aging* **2013**, 8:1365-1375.



66. Shenoy S, Bedi R, Sandhu JS: Effect of soy isolate protein and resistance exercises on muscle performance and bone health of osteopenic/osteoporotic post-menopausal women. *J Women Aging* **2013**, 25:183-198.
67. Soares ALS, Machado-Lima A, Brech GC, Greve JMD, Dos Santos JR, Inojossa TR, Rogero MM, Salles JEN, Santarem-Sobrinho JM, Davis CL, Alonso AC: The Influence of Whey Protein on Muscle Strength, Glycemic Control and Functional Tasks in Older Adults with Type 2 Diabetes Mellitus in a Resistance Exercise Program: Randomized and Triple Blind Clinical Trial. *Int J Environ Res Public Health* **2023**, 20.
68. Sugihara Junior P, Ribeiro AS, Nabuco HCG, Fernandes RR, Tomeleri CM, Cunha PM, Venturini D, Barbosa DS, Schoenfeld BJ, Cyrino ES: Effects of Whey Protein Supplementation Associated With Resistance Training on Muscular Strength, Hypertrophy, and Muscle Quality in Preconditioned Older Women. *Int J Sport Nutr Exerc Metab* **2018**, 28:528-535.
69. Tang W, Yan X, Fan P, Xu D, Li Y: Analysis of the Clinical Effect of Dietary Nutrition Intervention Combined with Resistance Training on the Cognitive Function of Elderly Male Patients with Sarcopenia. *Progr in Mod Biomed* **2020**, 20:2698-2701.
70. Thomson RL, Brinkworth GD, Noakes M, Buckley JD: Muscle strength gains during resistance exercise training are attenuated with soy compared with dairy or usual protein intake in older adults: A randomized controlled trial. *Clin Nutr* **2016**, 35:27-33.
71. Tieland M, Dirks ML, van der Zwaluw N, Verdijk LB, van de Rest O, de Groot LC, van Loon LJ: Protein supplementation increases muscle mass gain during prolonged resistance-type exercise training in frail elderly people: a randomized, double-blind, placebo-controlled trial. *J Am Med Dir Assoc* **2012**, 13:713-719.
72. Dirks ML, Tieland M, Verdijk LB, Losen M, Nilwik R, Mensink M, de Groot LCPGM, van Loon LJC: Protein Supplementation Augments Muscle Fiber Hypertrophy but Does Not Modulate Satellite Cell Content During Prolonged Resistance-Type Exercise Training in Frail Elderly. *J Am Med Dir Assoc* **2017**, 18:608-615.
73. Trevisan MC, Souza JM, Marucci Mde F: Influence of soy protein intake and weight training on the resting energy expenditure of postmenopausal women. *Rev Assoc Med Bras (1992)* **2010**, 56:572-578.
74. Unterberger S, Aschauer R, Zöhrer PA, Draxler A, Franzke B, Strasser EM, Wagner KH, Wessner B: Effects of an increased habitual dietary protein intake followed by resistance training on fitness, muscle quality and body composition of seniors: A randomised controlled trial. *Clin Nutr* **2022**, 41:1034-1045.
75. Verdijk LB, Jonkers RAM, Gleeson BG, Beelen M, Meijer K, Savelberg HHCM, Wodzig KWHW, Dendale P, Van Loon LJC: Protein supplementation before and after exercise does not further augment skeletal muscle hypertrophy after resistance training in elderly men. *American Journal of Clinical Nutrition* **2009**, 89:608-616.
76. Verreijen AM, Verlaan S, Engberink MF, Swinkels S, de Vogel-van den Bosch J, Weijs PJ: A high whey protein-, leucine-, and vitamin D-enriched supplement preserves muscle mass during intentional weight loss in obese older adults: A double-blind randomized controlled trial. *Am J Clin Nutr* **2015**, 101:279-286.
77. Vijayakumaran RK, Daly RM, Tan VPS: "We Want More"-Perspectives of Sarcopenic Older Women on the Feasibility of High-Intensity Progressive Resistance Exercises and a Whey-Protein Nutrition Intervention. *Front Nutr* **2023**, 10:1176523.

78. Vikberg S, Sörlén N, Brandén L, Johansson J, Nordström A, Hult A, Nordström P: Effects of Resistance Training on Functional Strength and Muscle Mass in 70-Year-Old Individuals With Pre-sarcopenia: A Randomized Controlled Trial. *J Am Med Dir Assoc* **2019**, 20:28-34.
79. Villanueva MG, He J, Schroeder ET: Periodized resistance training with and without supplementation improve body composition and performance in older men. *Eur J Appl Physiol* **2014**, 114:891-905.
80. Weisgarber KD, Candow DG, Farthing JP: Whey protein and high-volume resistance training in postmenopausal women. *J Nutr Health Aging* **2015**, 19:511-517.
81. Yamada M, Kimura Y, Ishiyama D, Nishio N, Otake Y, Tanaka T, Ohji S, Koyama S, Sato A, Suzuki M, et al: Synergistic effect of bodyweight resistance exercise and protein supplementation on skeletal muscle in sarcopenic or dynapenic older adults. *Geriatr Gerontol Int* **2019**.
82. Zdzieblik D, Jendricke P, Oesser S, Gollhofer A, König D: The Influence of Specific Bioactive Collagen Peptides on Body Composition and Muscle Strength in Middle-Aged, Untrained Men: A Randomized Controlled Trial. *Int J Environ Res Public Health* **2021**, 18.
83. Zhao T, Gao HL, Guo NZ, Chea ZM, Wu XY, He DL, Wei LQ, Shen XC, Lv WY: Effect of health education and whey protein supplementation combined with resistance exercise on the intervention of middle — aged and elderly people with sarcopenia. *J Clin Exp Med* **2022**, 12:90-94.
84. Zhu LY, Chan R, Kwok T, Cheng KC, Ha A, Woo J: Effects of exercise and nutrition supplementation in community-dwelling older Chinese people with sarcopenia: a randomized controlled trial. *Age Ageing* **2019**, 48:220-228.
85. Maltais ML, Ladouceur JP, Dionne IJ: The Effect of Resistance Training and Different Sources of Postexercise Protein Supplementation on Muscle Mass and Physical Capacity in Sarcopenic Elderly Men. *J Strength Cond Res* **2016**, 30:1680-1687.

Table S12: Judgments in each domain of GRADE ranking system for muscle mass outcome

| Treatment<br>(Common<br>comparator:<br>RC) | Involved<br>studies (n) | Participants<br>(n) | Study limitation                                                             |        |       |                     | Inconsistency (incoherence)   |                     |                     |            | Indirection (transitivity) |       |                               |     |            | Imprecision         |            | Publication bias                           |          | Certainty<br>of<br>evidence <sup>a</sup> |
|--------------------------------------------|-------------------------|---------------------|------------------------------------------------------------------------------|--------|-------|---------------------|-------------------------------|---------------------|---------------------|------------|----------------------------|-------|-------------------------------|-----|------------|---------------------|------------|--------------------------------------------|----------|------------------------------------------|
|                                            |                         |                     | Contribution of risks of<br>bias of direct estimates to<br>network estimates |        |       | Judgment            | Treatment effect, SMD (95%CI) |                     |                     | Judgment   | P                          | I     | C                             | O   | Judgment   | Network estimate    | Judgment   | Begg–<br>Mazumdar rank<br>correlation test | Judgment |                                          |
|                                            |                         |                     | High                                                                         | Mod    | Low   |                     | Direct estimate               | Indirect estimate   | Network estimate    |            |                            |       |                               |     |            |                     |            |                                            |          |                                          |
| Casein+RT                                  | 2                       | 46                  | 46.17%                                                                       | 53.40% | 0.44% | Serious limitations |                               | 0.87 (-0.13, 1.87)  | 0.87 (-0.13, 1.87)  | No serious | Older<br>people            | PS+RT | RC, PLA, active<br>comparator | LBM | No serious | 0.87 (-0.13, 1.87)  | Serious    | <i>p</i> < 0.01                            | Serious  | ⊕⊕⊕⊕                                     |
| Meat+RT                                    | 3                       | 131                 | 46.45%                                                                       | 53.29% | 0.27% | Serious limitations |                               | 1.23 (0.41, 2.04)   | 1.23 (0.41, 2.04)   | No serious | Older<br>people            | PS+RT | RC, PLA, active<br>comparator | LBM | No serious | 1.23 (0.41, 2.04)   | No serious | <i>p</i> < 0.01                            | Serious  | ⊕⊕⊕⊕                                     |
| MP+RT                                      | 16                      | 490                 | 27.61%                                                                       | 72.33% | 0.05% | Serious limitations | 1.31 (0.41, 2.22)             | 1.22 (0.77, 1.68)   | 1.24 (0.83, 1.65)   | No serious | Older<br>people            | PS+RT | RC, PLA, active<br>comparator | LBM | No serious | 1.24 (0.83, 1.65)   | No serious | <i>p</i> < 0.01                            | Serious  | ⊕⊕⊕⊕                                     |
| Peanut+RT                                  | 1                       | 20                  | 45.08%                                                                       | 54.78% | 0.14% | Serious limitations |                               | 0.95 (-0.14, 2.05)  | 0.95 (-0.14, 2.05)  | No serious | Older<br>people            | PS+RT | RC, PLA, active<br>comparator | LBM | No serious | 0.95 (-0.14, 2.05)  | Serious    | <i>p</i> < 0.01                            | Serious  | ⊕⊕⊕⊕                                     |
| SP+RT                                      | 11                      | 207                 | 9.26%                                                                        | 88.56% | 2.20% | Serious limitations | 1.06 (0.49, 1.63)             | 1.05 (0.40, 1.70)   | 1.06 (0.63, 1.49)   | No serious | Older<br>people            | PS+RT | RC, PLA, active<br>comparator | LBM | No serious | 1.06 (0.63, 1.49)   | No serious | <i>p</i> < 0.01                            | Serious  | ⊕⊕⊕⊕                                     |
| WP+RT                                      | 40                      | 991                 | 7.15%                                                                        | 91.88% | 0.97% | Serious limitations | 1.36 (0.90, 1.83)             | 1.21 (0.74, 1.68)   | 1.29 (0.96, 1.62)   | No serious | Older<br>people            | PS+RT | RC, PLA, active<br>comparator | LBM | No serious | 1.29 (0.96, 1.62)   | No serious | <i>p</i> < 0.01                            | Serious  | ⊕⊕⊕⊕                                     |
| Meat                                       | 1                       | 10                  | 43.18%                                                                       | 56.49% | 0.32% | Serious limitations |                               | -0.38 (-1.95, 1.19) | -0.38 (-1.95, 1.19) | No serious | Older<br>people            | PS    | RC, PLA, active<br>comparator | LBM | No serious | -0.38 (-1.95, 1.19) | Serious    | <i>p</i> < 0.01                            | Serious  | ⊕⊕⊕⊕                                     |
| MP                                         | 4                       | 99                  | 32.00%                                                                       | 67.88% | 0.12% | Serious limitations | 0.31 (-0.62, 1.24)            | 0.58 (-0.30, 1.74)  | 0.45 (-0.19, 1.09)  | No serious | Older<br>people            | PS    | RC, PLA, active<br>comparator | LBM | No serious | 0.45 (-0.19, 1.09)  | Serious    | <i>p</i> < 0.01                            | Serious  | ⊕⊕⊕⊕                                     |
| SP                                         | 6                       | 90                  | 9.69%                                                                        | 89.89% | 0.42% | Serious limitations | 0.19 (-0.49, 0.87)            | -0.17 (-1.11, 0.78) | 0.07 (-0.48, 0.62)  | No serious | Older<br>people            | PS    | RC, PLA, active<br>comparator | LBM | No serious | 0.07 (-0.48, 0.62)  | Serious    | <i>p</i> < 0.01                            | Serious  | ⊕⊕⊕⊕                                     |
| WP                                         | 10                      | 203                 | 12.29%                                                                       | 87.39% | 0.35% | Serious limitations | 0.31 (-0.18, 0.81)            | 0.46 (-0.33, 1.26)  | 0.36 (-0.07, 0.78)  | No serious | Older<br>people            | PS    | RC, PLA, active<br>comparator | LBM | No serious | 0.36 (-0.07, 0.78)  | Serious    | <i>p</i> < 0.01                            | Serious  | ⊕⊕⊕⊕                                     |
| RT                                         | 56                      | 1399                | 9.64%                                                                        | 90.20% | 0.18% | Serious limitations | 0.79 (0.42, 1.15)             | 0.51 (-0.06, 1.09)  | 0.71 (0.40, 1.02)   | No serious | Older<br>people            | RT    | RC, PLA, active<br>comparator | LBM | No serious | 0.71 (0.40, 1.02)   | No serious | <i>p</i> < 0.01                            | Serious  | ⊕⊕⊕⊕                                     |

<sup>a</sup>Certainty of evidence is graded as follows: High: ⊕╕╕╕; Moderate: ⊕╕╕╕; Low: ⊕╕╕╕; Very low: ⊕╕╕╕.  
CI, confidence interval; GRADE, Grading of Recommendations, Assessment, Development and Evaluations; LBM, lean body mass; MP, milk protein; PLA, placebo supplementation; PS, protein supplementation; RT, resistance training; SMD, standardized mean difference; SP, soy protein; WP, whey protein RC, regular care

Table S13: Judgments in each domain of GRADE framework for handgrip strength outcome

| Treatment<br>(Common<br>comparator:<br>RC) | Involved<br>studies (n) | Participants<br>(n) | Study limitation                                                             |        |        |                           | Inconsistency (incoherence) |                               |                     |            | Indirection (transitivity) |       |                               |    |            | Imprecision         |                  | Publication bias |                                            | Certainty<br>of<br>evidence <sup>a</sup> |      |
|--------------------------------------------|-------------------------|---------------------|------------------------------------------------------------------------------|--------|--------|---------------------------|-----------------------------|-------------------------------|---------------------|------------|----------------------------|-------|-------------------------------|----|------------|---------------------|------------------|------------------|--------------------------------------------|------------------------------------------|------|
|                                            |                         |                     | Contribution of risks of<br>bias of direct estimates to<br>network estimates |        |        |                           | Rate                        | Treatment effect, SMD (95%CI) |                     |            | Rate                       | P     | I                             | C  | O          | Rate                | Network estimate | Rate             | Begg–<br>Mazumdar rank<br>correlation test |                                          | Rate |
|                                            |                         |                     |                                                                              |        |        |                           |                             |                               |                     |            |                            |       |                               |    |            |                     |                  |                  |                                            |                                          |      |
|                                            |                         |                     | High                                                                         | Mod    | Low    | Direct estimate           | Indirect estimate           | Network estimate              |                     |            |                            |       |                               |    |            |                     |                  |                  |                                            |                                          |      |
| Casein+RT                                  | 2                       | 48                  | 86.51%                                                                       | 10.82% | 2.66%  | Serious limitations       | 2.98 (0.99, 4.97)           | -0.13 (-1.90, 1.64)           | 1.24 (-0.08, 2.56)  | Serious    | Older<br>people            | PS+RT | RC, PLA, active<br>comparator | HG | No serious | 1.24 (-0.08, 2.56)  | Serious          | <i>p</i> = 0.14  | Undetected                                 | ⊕⊖⊖⊖                                     |      |
| Meat+RT                                    | 1                       | 21                  | 11.00%                                                                       | 86.44% | 2.58%  | Serious limitations       | -0.88 (-2.82, 1.05)         | -0.80 (-4.45, 2.85)           | -0.87 (-2.57, 0.84) | No serious | Older<br>people            | PS+RT | RC, PLA, active<br>comparator | HG | No serious | -0.87 (-2.57, 0.84) | Serious          | <i>p</i> = 0.14  | Undetected                                 | ⊕⊕⊖⊖                                     |      |
| MP+RT                                      | 9                       | 368                 | 34.14%                                                                       | 60.42% | 5.43%  | Serious limitations       | 0.22 (-1.68, 2.13)          | 1.48 (0.64, 2.32)             | 1.27 (0.50, 2.04)   | No serious | Older<br>people            | PS+RT | RC, PLA, active<br>comparator | HG | No serious | 1.27 (0.50, 2.04)   | No serious       | <i>p</i> = 0.14  | Undetected                                 | ⊕⊕⊕⊖                                     |      |
| SP+RT                                      | 4                       | 99                  | 20.46%                                                                       | 24.56% | 54.99% | No serious<br>limitations | 1.51 (0.11, 2.90)           | 1.31 (0.60, 2.56)             | 1.40 (0.47, 2.33)   | No serious | Older<br>people            | PS+RT | RC, PLA, active<br>comparator | HG | No serious | 1.40 (0.47, 2.33)   | No serious       | <i>p</i> = 0.14  | Undetected                                 | ⊕⊕⊕⊕                                     |      |
| WP+RT                                      | 19                      | 596                 | 65.33%                                                                       | 29.84% | 4.82%  | Serious limitations       | 1.53 (0.88, 2.19)           | 1.30 (0.34, 2.26)             | 1.46 (0.92, 2.00)   | No serious | Older<br>people            | PS+RT | RC, PLA, active<br>comparator | HG | No serious | 1.46 (0.92, 2.00)   | No serious       | <i>p</i> = 0.14  | Undetected                                 | ⊕⊕⊕⊖                                     |      |
| SP                                         | 1                       | 15                  | 12.52%                                                                       | 16.60% | 70.87% | No serious<br>limitations | 0.90 (-1.08, 2.88)          | -1.17 (-4.24, 1.91)           | 0.29 (-1.37, 1.96)  | No serious | Older<br>people            | PS    | RC, PLA, active<br>comparator | HG | No serious | 0.29 (-1.37, 1.96)  | Serious          | <i>p</i> = 0.14  | Undetected                                 | ⊕⊕⊕⊖                                     |      |
| WP                                         | 6                       | 121                 | 83.35%                                                                       | 13.55% | 3.11%  | Serious limitations       | 0.12 (-0.77, 1.01)          | 1.19 (-0.09, 2.48)            | 0.47 (-0.26, 1.20)  | No serious | Older<br>people            | PS    | RC, PLA, active<br>comparator | HG | No serious | 0.47 (-0.26, 1.20)  | Serious          | <i>p</i> = 0.14  | Undetected                                 | ⊕⊕⊖⊖                                     |      |
| RT                                         | 25                      | 737                 | 33.37%                                                                       | 58.84% | 7.77%  | Serious limitations       | 0.56 (-0.13, 1.26)          | 1.65 (0.78, 2.52)             | 0.99 (0.44, 1.53)   | No serious | Older<br>people            | RT    | RC, PLA, active<br>comparator | HG | No serious | 0.99 (0.44, 1.53)   | No serious       | <i>p</i> = 0.14  | Undetected                                 | ⊕⊕⊕⊖                                     |      |

<sup>a</sup>Certainty of evidence is graded as follows: High: ⊕⊕⊕⊕; Moderate: ⊕⊕⊕⊖; Low: ⊕⊕⊖⊖; Very low: ⊕⊖⊖⊖.  
CI, confidence interval; GRADE, Grading of Recommendations, Assessment, Development and Evaluations; HG, handgrip strength; MP, milk protein; PLA, placebo supplementation; PS, protein supplementation; RT, resistance training; SMD, standardized mean difference; SP, soy protein; WP, whey protein RC, regular care

Table S14: Judgments in each domain of GRADE ranking system for leg strength outcome

| Treatment<br>(Common<br>comparator:<br>RC) | Involved<br>studies (n) | Participants<br>(n) | Study limitation                                                             |        |       |                        | Inconsistency (incoherence)     |                     |                     |            | Indirection (transitivity) |       |                               |                 |            | Imprecision         |            | Publication bias                          |                       | Certainty<br>of<br>evidence <sup>a</sup> |
|--------------------------------------------|-------------------------|---------------------|------------------------------------------------------------------------------|--------|-------|------------------------|---------------------------------|---------------------|---------------------|------------|----------------------------|-------|-------------------------------|-----------------|------------|---------------------|------------|-------------------------------------------|-----------------------|------------------------------------------|
|                                            |                         |                     | Contribution of risks of bias<br>of direct estimates to<br>network estimates |        |       | Judgment               | Treatment effect<br>SMD (95%CI) |                     |                     | Judgment   | P                          | I     | C                             | O               | Judgment   | Network<br>estimate | Judgment   | Begg–Mazumdar<br>rank correlation<br>test | Judgment              |                                          |
|                                            |                         |                     | High                                                                         | Mod    | Low   |                        | Direct estimate                 | Indirect estimate   | Network estimate    |            |                            |       |                               |                 |            |                     |            |                                           |                       |                                          |
| Casein+RT                                  | 1                       | 33                  | 39.88%                                                                       | 59.28% | 0.86% | Serious<br>limitations |                                 | 1.08 (-0.17; 2.32)  | 1.08 (-0.17; 2.32)  | No serious | Older<br>people            | PS+RT | RC, PLA, active<br>comparator | Leg<br>strength | No serious | 1.08 (-0.17; 2.32)  | Serious    | <i>p</i> < 0.01                           | Strongly<br>suspected | ⊕⊕⊕⊖                                     |
| Meat+RT                                    | 3                       | 130                 | 45.89%                                                                       | 53.83% | 0.26% | Serious<br>limitations |                                 | 1.27 (0.49; 2.05)   | 1.27 (0.49; 2.05)   | No serious | Older<br>people            | PS+RT | RC, PLA, active<br>comparator | Leg<br>strength | No serious | 1.27 (0.49; 2.05)   | No serious | <i>p</i> < 0.01                           | Strongly<br>suspected | ⊕⊕⊕⊖                                     |
| MP+RT                                      | 11                      | 309                 | 21.89%                                                                       | 77.91% | 0.20% | Serious<br>limitations | 0.69 (-0.47; 1.85)              | 1.45 (0.94, 1.97)   | 1.33 (0.86; 1.80)   | No serious | Older<br>people            | PS+RT | RC, PLA, active<br>comparator | Leg<br>strength | No serious | 1.33 (0.86; 1.80)   | No serious | <i>p</i> < 0.01                           | Strongly<br>suspected | ⊕⊕⊕⊖                                     |
| SP+RT                                      | 10                      | 204                 | 6.60%                                                                        | 91.12% | 2.27% | Serious<br>limitations | 1.73 (1.14; 2.32)               | 0.80 (0.13, 1.47)   | 1.32 (0.88; 1.77)   | Serious    | Older<br>people            | PS+RT | RC, PLA, active<br>comparator | Leg<br>strength | No serious | 1.32 (0.88; 1.77)   | No serious | <i>p</i> < 0.01                           | Strongly<br>suspected | ⊕⊕⊕⊖                                     |
| WP+RT                                      | 29                      | 754                 | 6.39%                                                                        | 92.35% | 1.27% | Serious<br>limitations | 1.30 (0.73; 1.87)               | 1.50 (0.99, 2.01)   | 1.41 (1.03; 1.79)   | No serious | Older<br>people            | PS+RT | RC, PLA, active<br>comparator | Leg<br>strength | No serious | 1.41 (1.03; 1.79)   | No serious | <i>p</i> < 0.01                           | Strongly<br>suspected | ⊕⊕⊕⊖                                     |
| Meat                                       | 1                       | 10                  | 40.29%                                                                       | 59.35% | 0.38% | Serious<br>limitations |                                 | -0.35 (-1.88; 1.18) | -0.35 (-1.88; 1.18) | No serious | Older<br>people            | PS    | RC, PLA, active<br>comparator | Leg<br>strength | No serious | -0.35 (-1.88; 1.18) | Serious    | <i>p</i> < 0.01                           | Strongly<br>suspected | ⊕⊕⊕⊖                                     |
| MP                                         | 3                       | 88                  | 23.23%                                                                       | 76.68% | 0.09% | Serious<br>limitations | -0.05 (-0.91; 0.82)             | 0.94 (-0.22, 2.09)  | 0.31 (-0.38; 1.00)  | No serious | Older<br>people            | PS    | RC, PLA, active<br>comparator | Leg<br>strength | No serious | 0.31 (-0.38; 1.00)  | Serious    | <i>p</i> < 0.01                           | Strongly<br>suspected | ⊕⊕⊕⊖                                     |
| SP                                         | 4                       | 70                  | 2.72%                                                                        | 96.81% | 0.50% | Serious<br>limitations | 0.41 (-0.32; 1.14)              | -1.31 (-2.68, 0.07) | 0.03 (-0.61; 0.68)  | Serious    | Older<br>people            | PS    | RC, PLA, active<br>comparator | Leg<br>strength | No serious | 0.03 (-0.61; 0.68)  | Serious    | <i>p</i> < 0.01                           | Strongly<br>suspected | ⊕⊕⊕⊖                                     |
| WP                                         | 5                       | 127                 | 12.93%                                                                       | 86.61% | 0.46% | Serious<br>limitations | 0.20 (-0.46; 0.85)              | 0.07 (-0.80, 0.94)  | 0.15 (-0.37; 0.67)  | No serious | Older<br>people            | PS    | RC, PLA, active<br>comparator | Leg<br>strength | No serious | 0.15 (-0.37; 0.67)  | Serious    | <i>p</i> < 0.01                           | Strongly<br>suspected | ⊕⊕⊕⊖                                     |
| RT                                         | 40                      | 1040                | 7.66%                                                                        | 92.06% | 0.25% | Serious<br>limitations | 0.94 (0.53; 1.36)               | 1.06 (0.41, 1.70)   | 0.98 (0.63; 1.33)   | No serious | Older<br>people            | RT    | RC, PLA, active<br>comparator | Leg<br>strength | No serious | 0.98 (0.63; 1.33)   | No serious | <i>p</i> < 0.01                           | Strongly<br>suspected | ⊕⊕⊕⊖                                     |

<sup>a</sup>Certainty of evidence is graded as follows: High: ⊕⊕⊕⊕; Moderate: ⊕⊕⊕⊖; Low: ⊕⊕⊖⊖; Very low: ⊕⊖⊖⊖.

CI, confidence interval; GRADE, Grading of Recommendations, Assessment, Development and Evaluations; LBM, lean body mass; MP, milk protein; PLA, placebo supplementation; PS, protein supplementation; RT, resistance training; SMD, standardized mean difference; SP, soy protein; WP, whey protein RC, regular care

Table S15: Judgments in each domain of GRADE ranking system for walking speed outcome

| Treatment<br>(Common<br>comparator:<br>RC) | Involved<br>studies (n) | Participants<br>(n) | Study limitation                                                             |        |       |                        | Inconsistency (incoherence)     |                     |                     |            | Indirection (transitivity) |       |                               |                  |            | Imprecision         |            | Publication bias                          |            | Certainty<br>of<br>evidence <sup>a</sup> |
|--------------------------------------------|-------------------------|---------------------|------------------------------------------------------------------------------|--------|-------|------------------------|---------------------------------|---------------------|---------------------|------------|----------------------------|-------|-------------------------------|------------------|------------|---------------------|------------|-------------------------------------------|------------|------------------------------------------|
|                                            |                         |                     | Contribution of risks of bias<br>of direct estimates to<br>network estimates |        |       | Judgment               | Treatment effect<br>SMD (95%CI) |                     |                     | Judgment   | P                          | I     | C                             | O                | Judgment   | Network<br>estimate | Judgment   | Begg–Mazumdar<br>rank correlation<br>test | Judgment   |                                          |
|                                            |                         |                     | High                                                                         | Mod    | Low   |                        | Direct estimate                 | Indirect estimate   | Network estimate    |            |                            |       |                               |                  |            |                     |            |                                           |            |                                          |
| Meat+RT                                    | 2                       | 101                 | 41.24%                                                                       | 58.76% | 0.00% | Serious<br>limitations | 0.04 (-1.15, 1.22)              | 0.97 (-0.08, 2.02)  | 0.56 (-0.23, 1.35)  | No serious | Older<br>people            | PS+RT | RC, PLA, active<br>comparator | Walking<br>speed | No serious | 0.56 (-0.23, 1.35)  | Serious    | <i>p</i> = 0.14                           | Undetected | ⊕⊕⊖⊖                                     |
| MP+RT                                      | 10                      | 350                 | 31.47%                                                                       | 68.53% | 0.00% | Serious<br>limitations | 0.19 (-0.94, 1.32)              | 0.60 (0.09, 1.11)   | 0.53 (0.07, 1.00)   | No serious | Older<br>people            | PS+RT | RC, PLA, active<br>comparator | Walking<br>speed | No serious | 0.53 (0.07, 1.00)   | No serious | <i>p</i> = 0.14                           | Undetected | ⊕⊕⊕⊖                                     |
| SP+RT                                      | 3                       | 87                  | 18.87%                                                                       | 81.13% | 0.00% | Serious<br>limitations | 0.55 (-0.28, 1.37)              | 0.65 (-0.30, 1.60)  | 0.59 (-0.03, 1.21)  | No serious | Older<br>people            | PS+RT | RC, PLA, active<br>comparator | Walking<br>speed | No serious | 0.59 (-0.03, 1.21)  | Serious    | <i>p</i> = 0.14                           | Undetected | ⊕⊕⊖⊖                                     |
| WP+RT                                      | 21                      | 601                 | 25.39%                                                                       | 74.60% | 0.00% | Serious<br>limitations | 0.84 (0.43, 1.25)               | 0.50 (-0.11, 1.10)  | 0.73 (0.39, 1.07)   | No serious | Older<br>people            | PS+RT | RC, PLA, active<br>comparator | Walking<br>speed | No serious | 0.73 (0.39, 1.07)   | No serious | <i>p</i> = 0.14                           | Undetected | ⊕⊕⊕⊖                                     |
| MP                                         | 2                       | 70                  | 64.36%                                                                       | 35.66% | 0.00% | Serious<br>limitations | -0.28 (-1.41, 0.85)             | -0.16 (-1.28, 0.96) | -0.22 (-1.02, 0.57) | No serious | Older<br>people            | PS    | RC, PLA, active<br>comparator | Walking<br>speed | No serious | -0.22 (-1.02, 0.57) | Serious    | <i>p</i> = 0.14                           | Undetected | ⊕⊕⊖⊖                                     |
| SP                                         | 3                       | 24                  | 70.25%                                                                       | 29.77% | 0.00% | Serious<br>limitations | 0.47 (-0.72, 1.66)              | 0.08 (-1.82, 1.97)  | 0.36 (-0.65, 1.37)  | No serious | Older<br>people            | PS    | RC, PLA, active<br>comparator | Walking<br>speed | No serious | 0.36 (-0.65, 1.37)  | Serious    | <i>p</i> = 0.14                           | Undetected | ⊕⊕⊖⊖                                     |
| WP                                         | 9                       | 189                 | 17.46%                                                                       | 82.55% | 0.00% | Serious<br>limitations | 0.76 (0.30, 1.22)               | -0.21 (-1.05, 0.62) | 0.53 (0.13, 0.94)   | Serious    | Older<br>people            | PS    | RC, PLA, active<br>comparator | Walking<br>speed | No serious | 0.53 (0.13, 0.94)   | No serious | <i>p</i> = 0.14                           | Undetected | ⊕⊕⊖⊖                                     |
| RT                                         | 29                      | 872                 | 26.45%                                                                       | 73.56% | 0.00% | Serious<br>limitations | 0.59 (0.22, 0.95)               | 0.28 (-0.39, 0.95)  | 0.52 (0.19, 0.84)   | No serious | Older<br>people            | RT    | RC, PLA, active<br>comparator | Walking<br>speed | No serious | 0.52 (0.19, 0.84)   | No serious | <i>p</i> = 0.14                           | Undetected | ⊕⊕⊕⊖                                     |

<sup>a</sup>Certainty of evidence is graded as follows: High: ⊕⊕⊕⊕; Moderate: ⊕⊕⊕⊖; Low: ⊕⊕⊖⊖; Very low: ⊕⊖⊖⊖.  
CI, confidence interval; GRADE, Grading of Recommendations, Assessment, Development and Evaluations; LBM, lean body mass; MP, milk protein; PLA, placebo supplementation; PS, protein supplementation; RT, resistance training; SMD, standardized mean difference; SP, soy protein; WP, whey protein RC, regular care

Table S16: Judgments in each domain of GRADE ranking system for chair rise outcome

| Treatment<br>(Common<br>comparator:<br>RC) | Involved<br>studies (n) | Participants<br>(n) | Study limitation                                                             |        |        |                           | Inconsistency (incoherence)     |                    |                    |            | Indirection (transitivity) |       |                               |               |            | Imprecision         |            | Publication bias                          |            | Certainty<br>of<br>evidence <sup>a</sup> |
|--------------------------------------------|-------------------------|---------------------|------------------------------------------------------------------------------|--------|--------|---------------------------|---------------------------------|--------------------|--------------------|------------|----------------------------|-------|-------------------------------|---------------|------------|---------------------|------------|-------------------------------------------|------------|------------------------------------------|
|                                            |                         |                     | Contribution of risks of bias<br>of direct estimates to<br>network estimates |        |        | Judgment                  | Treatment effect<br>SMD (95%CI) |                    |                    | Judgment   | P                          | I     | C                             | O             | Judgment   | Network<br>estimate | Judgment   | Begg–Mazumdar<br>rank correlation<br>test | Judgment   |                                          |
|                                            |                         |                     | High                                                                         | Mod    | Low    |                           | Direct estimate                 | Indirect estimate  | Network estimate   |            |                            |       |                               |               |            |                     |            |                                           |            |                                          |
| Meat+RT                                    | 1                       | 43                  | 20.68%                                                                       | 74.68% | 4.66%  | Serious<br>limitations    |                                 | 0.34 (-0.29, 0.97) | 0.34 (-0.29, 0.97) | No serious | Older<br>people            | PS+RT | RC, PLA, active<br>comparator | Chair<br>rise | No serious | 0.34 (-0.29, 0.97)  | Serious    | <i>p</i> = 0.72                           | Undetected | ⊕⊕⊖⊖                                     |
| MP+RT                                      | 10                      | 307                 | 39.35%                                                                       | 56.54% | 4.12%  | Serious<br>limitations    | 0.40 (-0.23, 1.03)              | 0.68 (0.33, 1.04)  | 0.62 (0.31, 0.92)  | No serious | Older<br>people            | PS+RT | RC, PLA, active<br>comparator | Chair<br>rise | No serious | 0.62 (0.31, 0.92)   | No serious | <i>p</i> = 0.72                           | Undetected | ⊕⊕⊕⊖                                     |
| SP+RT                                      | 2                       | 58                  | 18.69%                                                                       | 19.10% | 62.21% | No serious<br>limitations | 0.92 (0.31, 1.54)               | 0.82 (0.20, 1.45)  | 0.87 (0.44, 1.31)  | No serious | Older<br>people            | PS+RT | RC, PLA, active<br>comparator | Chair<br>rise | No serious | 0.87 (0.44, 1.31)   | No serious | <i>p</i> = 0.72                           | Undetected | ⊕⊕⊕⊕                                     |
| WP+RT                                      | 16                      | 488                 | 49.42%                                                                       | 44.70% | 5.88%  | Serious<br>limitations    | 0.98 (0.64, 1.32)               | 0.61 (0.20, 1.03)  | 0.84 (0.57, 1.10)  | No serious | Older<br>people            | PS+RT | RC, PLA, active<br>comparator | Chair<br>rise | No serious | 0.84 (0.57, 1.10)   | No serious | <i>p</i> = 0.72                           | Undetected | ⊕⊕⊕⊖                                     |
| MP                                         | 2                       | 25                  | 57.59%                                                                       | 39.29% | 3.10%  | Serious<br>limitations    |                                 | 0.31 (-0.44, 1.05) | 0.31 (-0.44, 1.05) | No serious | Older<br>people            | PS    | RC, PLA, active<br>comparator | Chair<br>rise | No serious | 0.31 (-0.44, 1.05)  | Serious    | <i>p</i> = 0.72                           | Undetected | ⊕⊕⊖⊖                                     |
| WP                                         | 4                       | 70                  | 81.51%                                                                       | 15.63% | 2.86%  | Serious<br>limitations    | 0.02 (-0.36, 0.41)              | 0.75 (-0.13, 1.63) | 0.14 (-0.21, 0.49) | No serious | Older<br>people            | PS    | RC, PLA, active<br>comparator | Chair<br>rise | No serious | 0.14 (-0.21, 0.49)  | Serious    | <i>p</i> = 0.72                           | Undetected | ⊕⊕⊖⊖                                     |
| RT                                         | 24                      | 737                 | 30.55%                                                                       | 62.56% | 6.89%  | Serious<br>limitations    | 0.82 (0.53, 1.11)               | 0.35 (-0.12, 0.83) | 0.69 (0.44, 0.94)  | No serious | Older<br>people            | RT    | RC, PLA, active<br>comparator | Chair<br>rise | No serious | 0.69 (0.44, 0.94)   | No serious | <i>p</i> = 0.72                           | Undetected | ⊕⊕⊕⊖                                     |

<sup>a</sup>Certainty of evidence is graded as follows: High: ⊕⊕⊕⊕; Moderate: ⊕⊕⊕⊖; Low: ⊕⊕⊖⊖; Very low: ⊕⊖⊖⊖.  
CI, confidence interval; GRADE, Grading of Recommendations, Assessment, Development and Evaluations; LBM, lean body mass; MP, milk protein; PLA, placebo supplementation; PS, protein supplementation; RT, resistance training; SMD, standardized mean difference; SP, soy protein; WP, whey protein RC, regular care

Table S17: Judgments in each domain of GRADE ranking system for timed up-and-go outcome

| Treatment<br>(Common<br>comparator:<br>RC) | Involved<br>studies (n) | Participants<br>(n) | Study limitation                                                             |        |        |                        | Inconsistency (incoherence)     |                     |                     |            | Indirection (transitivity) |       |                               |     |            | Imprecision         |          | Publication bias                          |            | Certainty<br>of<br>evidence <sup>a</sup> |
|--------------------------------------------|-------------------------|---------------------|------------------------------------------------------------------------------|--------|--------|------------------------|---------------------------------|---------------------|---------------------|------------|----------------------------|-------|-------------------------------|-----|------------|---------------------|----------|-------------------------------------------|------------|------------------------------------------|
|                                            |                         |                     | Contribution of risks of bias<br>of direct estimates to<br>network estimates |        |        | Judgment               | Treatment effect<br>SMD (95%CI) |                     |                     | Judgment   | P                          | I     | C                             | O   | Judgment   | Network<br>estimate | Judgment | Begg–Mazumdar<br>rank correlation<br>test | Judgment   |                                          |
|                                            |                         |                     | High                                                                         | Mod    | Low    |                        | Direct estimate                 | Indirect estimate   | Network estimate    |            |                            |       |                               |     |            |                     |          |                                           |            |                                          |
| Meat+RT                                    | 2                       | 120                 | 66.66%                                                                       | 33.33% | 0.00%  | Serious<br>limitations |                                 | 0.15 (-0.74, 1.03)  | 0.15 (-0.74, 1.03)  | No serious | Older<br>people            | PS+RT | RC, PLA, active<br>comparator | TUG | No serious | 0.15 (-0.74, 1.03)  | Serious  | <i>p</i> = 0.17                           | Undetected | ⊕⊕⊖⊖                                     |
| MP+RT                                      | 2                       | 47                  | 100.00%                                                                      | 0.00%  | 0.00%  | Serious<br>limitations | 0.33 (-0.16, 0.82)              |                     | 0.33 (-0.16, 0.82)  | No serious | Older<br>people            | PS+RT | RC, PLA, active<br>comparator | TUG | No serious | 0.33 (-0.16, 0.82)  | Serious  | <i>p</i> = 0.17                           | Undetected | ⊕⊕⊖⊖                                     |
| SP+RT                                      | 1                       | 22                  | 29.32%                                                                       | 41.35% | 29.32% | Serious<br>limitations |                                 | -0.30 (-1.30, 0.70) | -0.30 (-1.30, 0.70) | No serious | Older<br>people            | PS+RT | RC, PLA, active<br>comparator | TUG | No serious | -0.30 (-1.30, 0.70) | Serious  | <i>p</i> = 0.17                           | Undetected | ⊕⊕⊖⊖                                     |
| WP+RT                                      | 4                       | 244                 | 33.08%                                                                       | 65.39% | 1.52%  | Serious<br>limitations |                                 | 0.15 (-0.72, 1.02)  | 0.15 (-0.72, 1.02)  | No serious | Older<br>people            | PS+RT | RC, PLA, active<br>comparator | TUG | No serious | 0.15 (-0.72, 1.02)  | Serious  | <i>p</i> = 0.17                           | Undetected | ⊕⊕⊖⊖                                     |
| RT                                         | 7                       | 360                 | 50.00%                                                                       | 50.00% | 0.00%  | Serious<br>limitations |                                 | 0.12 (-0.73, 0.97)  | 0.12 (-0.73, 0.97)  | No serious | Older<br>people            | RT    | RC, PLA, active<br>comparator | TUG | No serious | 0.12 (-0.73, 0.97)  | Serious  | <i>p</i> = 0.17                           | Undetected | ⊕⊕⊖⊖                                     |

<sup>a</sup>Certainty of evidence is graded as follows: High: ⊕╕╕╕; Moderate: ⊕╕╕⊖; Low: ⊕╕⊖⊖; Very low: ⊕⊖⊖⊖.  
CI, confidence interval; GRADE, Grading of Recommendations, Assessment, Development and Evaluations; LBM, lean body mass; MP, milk protein; PLA, placebo supplementation; PS, protein supplementation; RT, resistance training; SMD, standardized mean difference; SP, soy protein; TUG, timed up and go; WP, whey protein RC, regular care



Table S18: Judgments in each domain of GRADE ranking system for global mobility (SPPB) outcome

| Treatment<br>(Common<br>comparator:<br>RC) | Involved<br>studies (n) | Participants<br>(n) | Study limitation                                                             |        |       |                        | Inconsistency (incoherence)     |                   |                  |                    | Indirection (transitivity) |                 |                 |                               |                               | Imprecision         |                    | Publication bias                          |                 | Certainty<br>of<br>evidence <sup>a</sup> |            |      |
|--------------------------------------------|-------------------------|---------------------|------------------------------------------------------------------------------|--------|-------|------------------------|---------------------------------|-------------------|------------------|--------------------|----------------------------|-----------------|-----------------|-------------------------------|-------------------------------|---------------------|--------------------|-------------------------------------------|-----------------|------------------------------------------|------------|------|
|                                            |                         |                     | Contribution of risks of bias<br>of direct estimates to<br>network estimates |        |       | Judgment               | Treatment effect<br>SMD (95%CI) |                   |                  | Judgment           | P                          | I               | C               | O                             | Judgment                      | Network<br>estimate | Judgment           | Begg–Mazumdar<br>rank correlation<br>test | Judgment        |                                          |            |      |
|                                            |                         |                     | High                                                                         | Mod    | Low   |                        | Direct estimate                 | Indirect estimate | Network estimate |                    |                            |                 |                 |                               |                               |                     |                    |                                           |                 |                                          |            |      |
| Casein+RT                                  | 1                       | 28                  | 100.00%                                                                      | 0.00%  | 0.00% | Serious<br>limitations | 0.90 (-0.26, 2.06)              |                   |                  | 0.90 (-0.26, 2.06) | No serious                 | Older<br>people | PS+RT           | RC, PLA, active<br>comparator | SPPB                          | No serious          | 0.90 (-0.26, 2.06) | Serious                                   | <i>p</i> = 0.38 | Undetected                               | ⊕⊕⊖⊖       |      |
| MP+RT                                      | 5                       | 151                 | 69.51%                                                                       | 30.49% | 0.00% | Serious<br>limitations | 0.33 (-0.80, 1.46)              |                   |                  | 1.46 (0.47, 2.45)  | 0.97 (0.22, 1.71)          | No serious      | Older<br>people | PS+RT                         | RC, PLA, active<br>comparator | SPPB                | No serious         | 0.97 (0.22, 1.71)                         | No serious      | <i>p</i> = 0.38                          | Undetected | ⊕⊕⊕⊖ |
| WP+RT                                      | 7                       | 222                 | 83.29%                                                                       | 16.70% | 0.00% | Serious<br>limitations | 1.79 (1.09, 2.48)               |                   |                  | 022 (-1.12, 1.56)  | 1.45 (0.84, 2.07)          | Serious         | Older<br>people | PS+RT                         | RC, PLA, active<br>comparator | SPPB                | No serious         | 1.45 (0.84, 2.07)                         | No serious      | <i>p</i> = 0.38                          | Undetected | ⊕⊕⊖⊖ |
| WP                                         | 3                       | 15                  | 26.44%                                                                       | 73.57% | 0.00% | Serious<br>limitations | 0.63 (-0.64, 1.89)              |                   |                  | 2.94 (0.75, 5.14)  | 1.21 (0.11, 2.30)          | No serious      | Older<br>people | PS                            | RC, PLA, active<br>comparator | SPPB                | No serious         | 1.21 (0.11, 2.30)                         | No serious      | <i>p</i> = 0.38                          | Undetected | ⊕⊕⊕⊖ |
| RT                                         | 9                       | 209                 | 64.04%                                                                       | 35.95% | 0.00% | Serious<br>limitations | 0.30 (-0.95, 1.55)              |                   |                  | 1.53 (0.72, 2.33)  | 1.17 (0.49, 1.84)          | No serious      | Older<br>people | RT                            | RC, PLA, active<br>comparator | SPPB                | No serious         | 1.17 (0.49, 1.84)                         | No serious      | <i>p</i> = 0.38                          | Undetected | ⊕⊕⊕⊖ |

<sup>a</sup>Certainty of evidence is graded as follows: High: ⊕⊕⊕⊕; Moderate: ⊕⊕⊕⊖; Low: ⊕⊕⊖⊖; Very low: ⊕⊖⊖⊖.  
CI, confidence interval; GRADE, Grading of Recommendations, Assessment, Development and Evaluations; LBM, lean body mass; MP, milk protein; PLA, placebo supplementation; PS, protein supplementation; RT, resistance training; SMD, standardized mean difference; SP, soy protein; SPPB, Short Physical Performance Battery; WP, whey protein RC, regular care
